# Supplementary material for: Conformation-tunable ATP-competitive kinase inhibitors
Source: Royal Society of Chemistry journal article supplement (doi:10.1039/d1cc06893h), 2022-01-01
Supplement: d1cc06893h1.pdf [file d1cc06893h1.pdf]

## **Conformation-tunable ATP-competitive kinase inhibitors**

Michael P. Agius, Kristin Ko, Taylor K. Johnson, Sameer Phadke, Matthew B. Soellner

### **Supporting Information**

- I** Compound table, pages 2–5
- II** General synthetic methods, page 3
- III** Synthetic protocols for novel compounds, pages 3–13
- IV** Analytical data for novel compounds, pages 14–26
- V** Selective proteolysis method, page 27
- VI** Compound table with proteolysis half-lives, pages 28–31
- VII** Selective proteolysis analytical data, pages 31–39
- VIII** Kinome profiling data, pages 40–99

## I. Compound table

| Compound | Structure                                                                           | Reference (or this paper)                             |
|----------|-------------------------------------------------------------------------------------|-------------------------------------------------------|
| 1        | 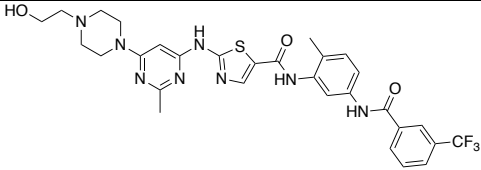   | <i>ACS Chem. Biol.</i> , 2019, <b>14</b> , 1556–1563. |
| 2        |    | <i>ACS Chem. Biol.</i> , 2019, <b>14</b> , 1556–1563. |
| 3        |    | This paper                                            |
| 4        |    | <i>Nat. Chem. Biol.</i> , 2008, <b>4</b> , 691–699.   |
| 5        |   | <i>Chem. Biol.</i> , 2008, <b>15</b> , 1015–1022.     |
| 6        |  | This paper                                            |
| 7        |  | This paper                                            |
| 8        |  | This paper                                            |
| 9        |  | This paper                                            |

|     |                                                                                     |                                                                 |
|-----|-------------------------------------------------------------------------------------|-----------------------------------------------------------------|
| 10  | 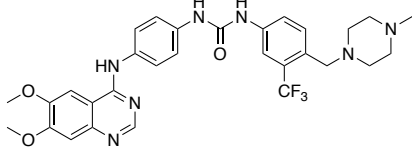   | <i>Bioorg. Med. Chem. Lett.</i> ,<br>2016, <b>24</b> , 179–190. |
| 11  |    | <i>Biochem.</i> , 2001, <b>40</b> , 7084–7091.                  |
| 12  |    | This paper                                                      |
| S13 |    | <i>ACS Med. Chem. Lett.</i> ,<br>2010, <b>1</b> , 331–335.      |
| S14 |    | <i>ACS Med. Chem. Lett.</i> ,<br>2010, <b>1</b> , 331–335.      |
| S15 |  | <i>Nat. Chem. Biol.</i> , 2008, <b>4</b> ,<br>691–699.          |
| S16 |  | This paper                                                      |
| S17 |  | PCT Int. Appl. 2010, WO<br>20100045542.                         |
| S18 |  | <i>Nature</i> , 2012, <b>486</b> , 80–84.                       |

|     |                                                                                     |                                                     |
|-----|-------------------------------------------------------------------------------------|-----------------------------------------------------|
| S19 | 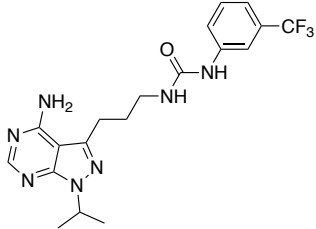   | This paper                                          |
| S20 |    | This paper                                          |
| S21 |    | <i>J. Med. Chem.</i> , 2012, <b>55</b> , 2416–2426. |
| S22 |   | This paper                                          |
| S23 |  | This paper                                          |
| S24 |  | This paper                                          |
| S25 |  | This paper                                          |

|     |                                                                                   |            |
|-----|-----------------------------------------------------------------------------------|------------|
| S26 | 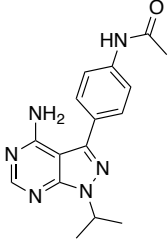 | This paper |
|-----|-----------------------------------------------------------------------------------|------------|

## II. General Synthetic Methods

Unless otherwise noted, all reagents were obtained via commercial sources and used without further purification.  $^1\text{H}$  NMR and  $^{13}\text{C}$  NMR spectra were measured with a Varian MR400 or Inova 500 spectrometer.

## III. Synthetic protocols for novel compounds

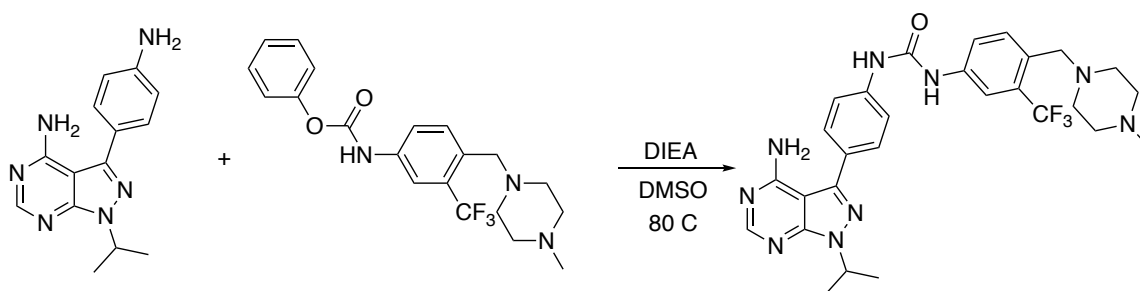

**Scheme S1.** Synthesis of Compound **3**

1-(4-(4-amino-1-isopropyl-1*H*-pyrazolo[3,4-*d*]pyrimidin-3-yl)phenyl)-3-(4-((4-methylpiperazin-1-yl)methyl)-3-(trifluoromethyl)phenyl)urea (**3**). In a 5 mL round bottom flask, 3-(4-aminophenyl)-1-isopropyl-1*H*-pyrazolo[3,4-*d*]pyrimidin-4-amine (25 mg, 0.09 mmol) and phenyl 4-((4-methylpiperazin-1-yl)methyl)-3-(trifluoromethyl)phenylcarbamate (35 mg, 0.09 mmol) was dissolved in 2 mL of DMSO. DIEA (31  $\mu\text{L}$ , 0.18 mmol) was added and the reaction was stirred at 80 C for 2 hours. The reaction was cooled to room temperature and immediately purified by reverse phase HPLC using a linear 30% - 90% acetonitrile in  $\text{H}_2\text{O}$  gradient to afford **3** as a white solid (10 mg, 0.02 mmol). Yield = 20%.  $^1\text{H}$  NMR (500 MHz,  $\text{DMSO-}d_6$ )  $\delta$  9.33 (s, 1H), 9.26 (s, 1H), 8.22 (s, 1H), 8.03 – 7.97 (m, 1H), 7.65 (d,  $J = 8.6$  Hz, 2H), 7.63 – 7.56 (m, 4H), 5.05 (p,  $J = 6.7$  Hz, 1H), 3.53 (s, 2H), 2.36 (s, 8H), 2.15 (s, 3H), 1.49 (d,  $J = 6.7$  Hz, 6H).  $^{13}\text{C}$  NMR (126 MHz,  $\text{DMSO}$ )  $\delta$  159.81, 159.53, 159.26, 158.99, 154.45, 153.02, 151.71, 149.77, 145.88, 141.13, 139.97, 132.25, 129.34, 125.59, 123.63, 121.97, 119.13, 115.58, 97.11, 56.88, 53.03, 49.71, 49.41, 42.53, 22.16. HRMS-ESI ( $m/z$ ):  $[\text{M} + \text{H}]^+$  calcd for  $\text{C}_{28}\text{H}_{33}\text{F}_3\text{N}_9\text{O}$ , 568.2755; found 567.2750.

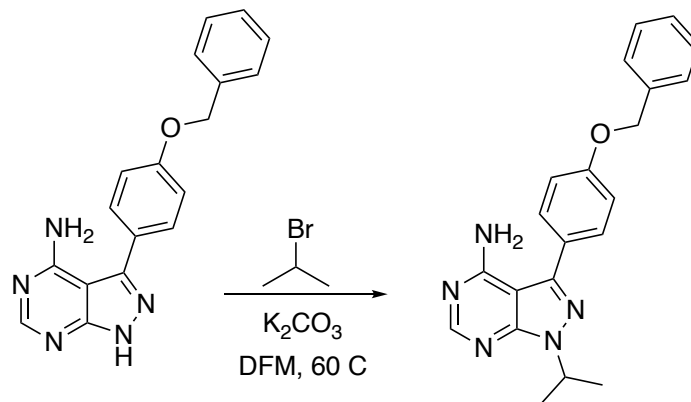

**Scheme S2.** Synthesis of Compound **6**

3-(4-(benzyloxy)phenyl)-1-isopropyl-1*H*-pyrazolo[3,4-*d*]pyrimidin-4-amine (**6**). To a 10 mL round bottom flask, compound 3-(4-(benzyloxy)phenyl)-1*H*-pyrazolo[3,4-*d*]pyrimidin-4-amine (9.5 mg, 0.03 mmol) and potassium carbonate (12 mg, 0.09 mmol) was dissolved in 5 mL of dry DMF. 2-bromopropane (3  $\mu$ L, 0.04 mmol) was added and the reaction was stirred at 60 C for 6 h. The reaction was cooled to room temperature and immediately purified using reverse phase HPLC using a linear 30% - 90% acetonitrile in H<sub>2</sub>O to afford **6** as a white solid (7.6 mg, 0.02 mmol). Yield = 71%. <sup>1</sup>H NMR (500 MHz, DMSO-*d*<sub>6</sub>):  $\delta$  8.22 (s, 1H), 7.59 (d, *J* = 8.7 Hz, 2H), 7.49 (d, *J* = 7.2 Hz, 2H), 7.41 (t, *J* = 7.6 Hz, 2H), 7.35 (t, *J* = 7.3 Hz, 1H), 7.28 (d, *J* = 8.7 Hz, 2H), 5.18 (s, 2H), 5.04 (p, *J* = 6.7 Hz, 1H), 1.47 (d, *J* = 6.7 Hz, 6H). <sup>13</sup>C NMR (500 MHz, DMSO-*d*<sub>6</sub>):  $\delta$  159.06, 158.56, 155.81, 153.64, 143.44, 137.34, 130.03, 128.92, 128.35, 128.20, 126.17, 115.82, 97.84, 69.78, 48.44, 22.24. HRMS-ESI (*m/z*): [*M* + *H*]<sup>+</sup> calcd for C<sub>21</sub>H<sub>22</sub>N<sub>5</sub>O, 360.1819; found 360.1831.

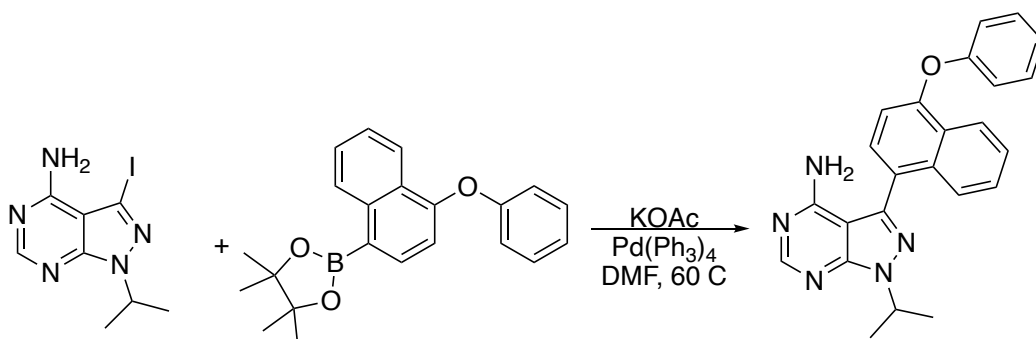

**Scheme S3.** Synthesis of Compound **7**

1-isopropyl-3-(4-phenoxy-naphthalen-1-yl)-1*H*-pyrazolo[3,4-*d*]pyrimidin-4-amine (**7**). In a 5 mL round bottom flask, 3-iodo-1-isopropyl-1*H*-pyrazolo[3,4-*d*]pyrimidin-4-amine (10 mg, 0.03 mmol), 4,4,5,5-tetramethyl-2-(4-phenoxy-naphthalen-1-yl)-1,3,2-dioxaborolane (10 mg, 0.03 mmol), potassium acetate (9 mg, 0.09 mmol), and palladium tetrakis (4 mg, 0.003 mmol) was dissolved in 5 mL of dry DMF. The reaction was heated to 60 C, stirred for 16, cooled to room temperature, and immediately purified by reverse phase HPLC using a linear 30% - 90% ACN in H<sub>2</sub>O gradient to afford **7** as a white solid (2 mg, 0.005 mmol), yield = 18%. <sup>1</sup>H NMR (500 MHz, DMSO-*d*<sub>6</sub>): <sup>13</sup>C NMR (500 MHz, DMSO-*d*<sub>6</sub>):  $\delta$  158.30, 156.04, 153.38, 153.33, 141.70, 133.45, 130.57, 129.12, 127.92, 126.97, 126.83, 126.22, 126.16, 124.06, 122.27, 118.98, 113.57, 48.62, 42.55, 40.88, 22.33. HRMS-ESI (*m/z*): [*M* + *H*]<sup>+</sup> calcd for C<sub>24</sub>H<sub>22</sub>N<sub>5</sub>O, 396.1819; found 396.1810.

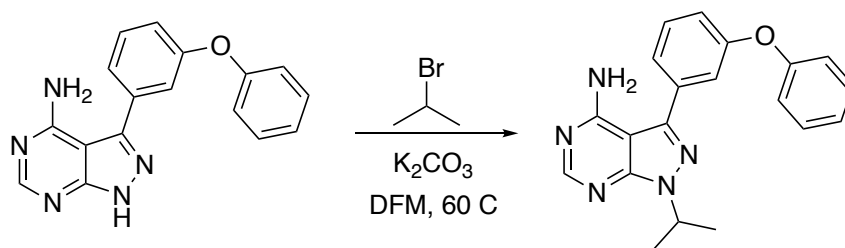

**Scheme S4.** Synthesis of Compound **8**

1-isopropyl-3-(3-phenoxyphenyl)-1*H*-pyrazolo[3,4-*d*]pyrimidin-4-amine (**8**). To a 10 mL round bottom flask, compound 3-(3-phenoxyphenyl)-1*H*-pyrazolo[3,4-*d*]pyrimidin-4-amine (10 mg, 0.03 mmol) and potassium carbonate (12 mg, 0.09 mmol) was dissolved in 5 mL of dry DMF. 2-bromopropane (3  $\mu$ L, 0.04 mmol) was added and the reaction was stirred at 60 C for 6 h. The reaction was cooled to room temperature and immediately purified using reverse phase HPLC using a linear 30% - 90% ACN in H<sub>2</sub>O to afford **8** as a white solid (4.7 mg, 0.013 mmol). Yield = 45%. <sup>1</sup>H NMR (500 MHz, Chloroform-*d*)  $\delta$  8.37 (s, 1H), 7.49 (t, *J* = 7.8 Hz, 1H), 7.44 (d, *J* = 7.6 Hz, 1H), 7.38 (t, *J* = 7.9 Hz, 2H), 7.34 (s, 1H), 7.16 (t, *J* = 7.4 Hz, 1H), 7.10 (t, *J* = 8.4 Hz, 3H), 5.58 (s, 2H), 5.19 (p, *J* = 6.7 Hz, 1H), 1.60 (d, *J* = 6.7 Hz, 6H). HRMS-ESI (*m/z*): [M + H]<sup>+</sup> calcd for C<sub>20</sub>H<sub>20</sub>N<sub>5</sub>O, 346.1662; found 346.1674.

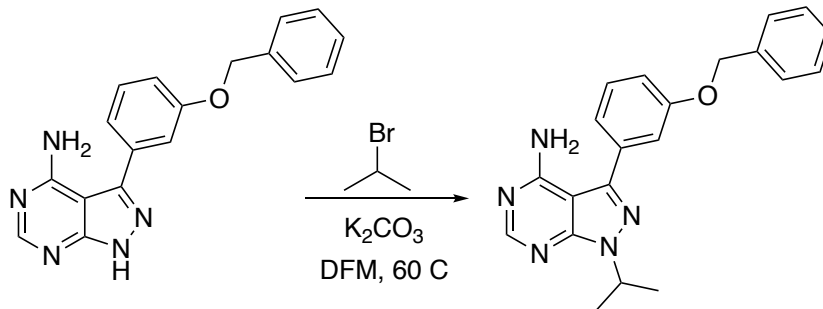

**Scheme S5.** Synthesis of Compound **9**

3-(3-(benzyloxy)phenyl)-1-isopropyl-1*H*-pyrazolo[3,4-*d*]pyrimidin-4-amine (**9**). To a 10 mL round bottom flask, compound 3-(3-(benzyloxy)phenyl)-1*H*-pyrazolo[3,4-*d*]pyrimidin-4-amine (9.5 mg, 0.03 mmol) and potassium carbonate (12 mg, 0.09 mmol) was dissolved in 5 mL of dry DMF. 2-bromopropane (3  $\mu$ L, 0.04 mmol) was added and the reaction was stirred at 60 C for 6 h. The reaction was cooled to room temperature and immediately purified using reverse phase HPLC using a linear 30% - 90% ACN in H<sub>2</sub>O to afford **9** as a white solid (5.3 mg, 0.015 mmol). Yield = 50%. <sup>1</sup>H NMR (500 MHz, Chloroform-*d*)  $\delta$  8.37 (s, 1H), 7.46 (t, *J* = 6.4 Hz, 3H), 7.42 (t, *J* = 7.6 Hz, 2H), 7.36 (t, *J* = 6.9 Hz, 1H), 7.32 – 7.28 (m, 2H), 7.11 (dd, *J* = 8.3, 2.5 Hz, 1H), 5.42 (s, 2H), 5.24 – 5.15 (m, 3H), 1.62 (d, *J* = 6.7 Hz, 6H). HRMS-ESI (*m/z*): [M + H]<sup>+</sup> calcd for C<sub>22</sub>H<sub>25</sub>N<sub>5</sub>O, 375.2054; found 375.2049.

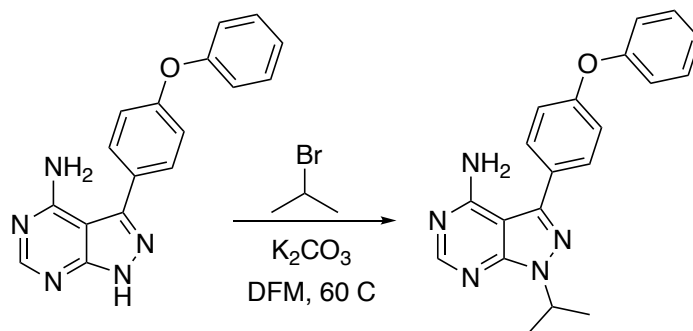

**Scheme S6.** Synthesis of Compound **12**

1-isopropyl-3-(4-phenoxyphenyl)-1*H*-pyrazolo[3,4-*d*]pyrimidin-4-amine (**12**). To a 10 mL round bottom flask, compound 3-(4-phenoxyphenyl)-1*H*-pyrazolo[3,4-*d*]pyrimidin-4-amine (10 mg, 0.03 mmol) and potassium carbonate (12 mg, 0.09 mmol) was dissolved in 5 mL of dry DMF. 2-bromopropane (3  $\mu$ L, 0.04 mmol) was added and the reaction was stirred at 60 C for 6 h. The reaction was cooled to room temperature and immediately purified using reverse phase HPLC using a linear 30% - 90% ACN in H<sub>2</sub>O to afford **12** as a white solid (7 mg, 0.02 mmol). Yield = 65%. <sup>1</sup>H NMR (500 MHz, DMSO-*d*<sub>6</sub>):  $\delta$  8.35 (s, 1H), 7.64 (d, *J* = 8.0 Hz, 2H), 7.36 (t, *J* = 7.7, 7.7 Hz, 2H), 7.14 (t, *J* = 8.5 Hz, 3H), 7.06 (d, *J* = 8.6 Hz, 2H), 5.58 (s, 3H), 5.16 (p, *J* = 6.7 Hz, 1H), 1.58 (d, *J* = 6.7 Hz, 6H). <sup>13</sup>C NMR (500 MHz, DMSO-*d*<sub>6</sub>):  $\delta$  162.35, 160.73, 159.59, 158.97. HRMS-ESI (*m/z*): [*M* + *H*]<sup>+</sup> calcd for C<sub>20</sub>H<sub>20</sub>N<sub>5</sub>O, 346.1662; found 346.1660.

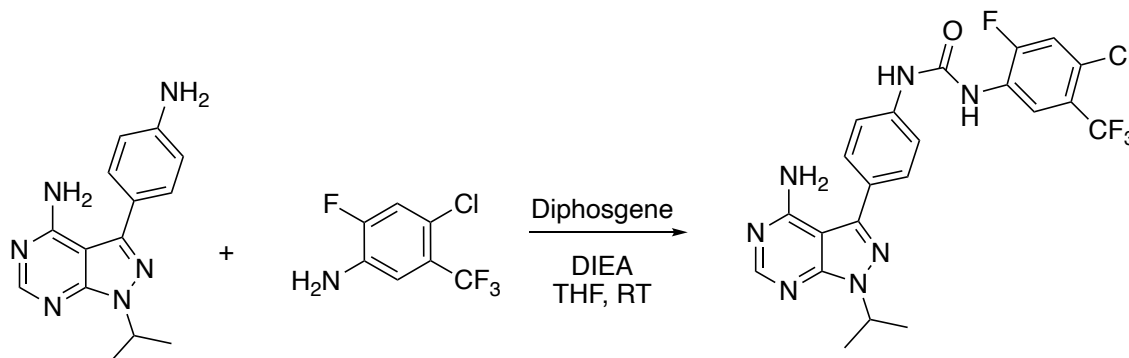

**Scheme S7.** Synthesis of Compound **S16**

1-(4-(4-amino-1-isopropyl-1*H*-pyrazolo[3,4-*d*]pyrimidin-3-yl)phenyl)-3-(4-chloro-2-fluoro-5-(trifluoromethyl)phenyl)urea (**S16**). To a 10 mL round bottom flask, 4-chloro-2-fluoro-5-(trifluoromethyl)aniline (19 mg, 0.09 mmol) was dissolved in 5 mL dry THF. Diposgene (22  $\mu$ L, 0.18 mmol) was added and the reaction was refluxed for 2 h, cooled to room temperature, and concentrated *in vacuo*. The residue was resuspended in 5 mL of dry THF in which 3-(4-aminophenyl)-1-isopropyl-1*H*-pyrazolo[3,4-*d*]pyrimidin-4-amine (25 mg, 0.09 mmol) and DIEA (31  $\mu$ L, 0.18 mmol) was added and the reaction was allowed to stir at room temperature for 4 hours. The reaction was concentrated *in vacuo* and the residue was purified using reverse phase HPLC using a linear 30% - 90% ACN in H<sub>2</sub>O to afford **S16** as a white solid (10.5 mg, 0.02 mmol). Yield = 23%. <sup>1</sup>H NMR (500 MHz, DMSO-*d*<sub>6</sub>): <sup>13</sup>C NMR (126 MHz, dmsO)  $\delta$  158.55, 155.81, 154.47, 153.71, 152.46, 152.32, 143.44, 139.66, 129.39, 127.96, 127.86, 127.69, 119.42, 119.23, 119.08, 97.84, 48.50, 22.24. HRMS-ESI (*m/z*): [*M* + *H*]<sup>+</sup> calcd for C<sub>22</sub>H<sub>19</sub>ClF<sub>4</sub>N<sub>7</sub>O, 508.1270;



found 508.1270.

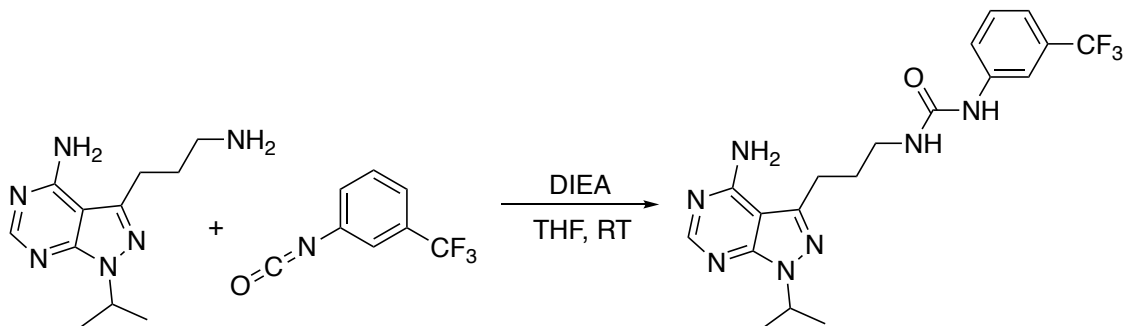

**Scheme S8.** Synthesis of Compound **S19**

1-(3-(4-amino-1-isopropyl-1H-pyrazolo[3,4-d]pyrimidin-3-yl)propyl)-3-(3-(trifluoromethyl)phenyl)urea (**S19**). To a 10 mL round bottom flask, 3-(3-aminopropyl)-1-isopropyl-1H-pyrazolo[3,4-d]pyrimidin-4-amine (21 mg, 0.09 mmol) was dissolved in 5 mL dry THF. 1-isocyanato-3-(trifluoromethyl)benzene (13  $\mu$ L, 0.09 mmol) and DIEA (31  $\mu$ L, 0.18 mmol) was added and the reaction was stirred at room temperature for 4 h and concentrated *in vacuo*. The residue was purified using reverse phase HPLC using a linear 30% - 90% ACN in H<sub>2</sub>O to afford **S19** as a white solid (15 mg, 0.04 mmol). Yield = 67%. <sup>1</sup>H NMR (500 MHz, dmso)  $\delta$  8.82 (s, 1H), 8.13 (d,  $J$  = 2.0 Hz, 1H), 7.94 (s, 1H), 7.48 (d,  $J$  = 8.3 Hz, 1H), 7.42 (t,  $J$  = 7.9, 7.9 Hz, 1H), 7.19 (d,  $J$  = 7.7 Hz, 1H), 6.35 (t, 1H), 4.91 (p,  $J$  = 12.5, 7.1, 7.1 Hz, 1H), 3.15 (q,  $J$  = 6.8, 6.8, 6.8 Hz, 2H), 3.00 – 2.94 (m, 2H), 1.78 (t,  $J$  = 7.6, 7.6 Hz, 2H), 1.39 (d,  $J$  = 6.7 Hz, 6H). HRMS-ESI ( $m/z$ ): [M + H]<sup>+</sup> calcd for C<sub>19</sub>H<sub>23</sub>F<sub>3</sub>N<sub>7</sub>O, 422.1911; found 422.1910.

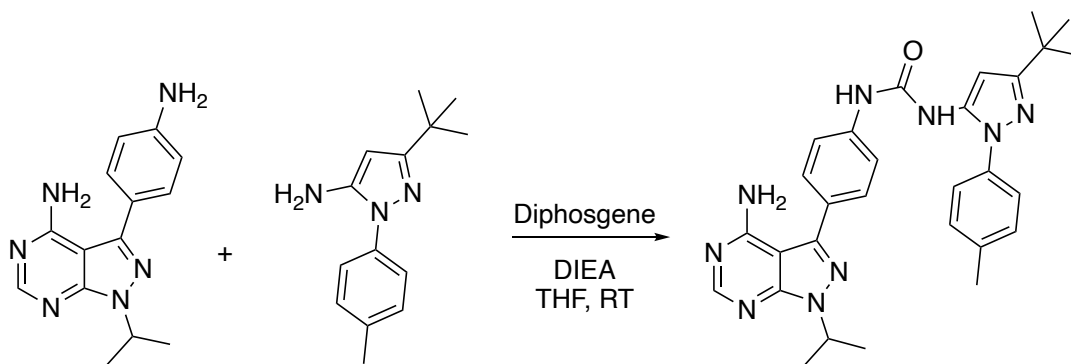

**Scheme S9.** Synthesis of Compound **S20**

1-(4-(4-amino-1-isopropyl-1H-pyrazolo[3,4-d]pyrimidin-3-yl)phenyl)-3-(3-(*tert*-butyl)-1-(*p*-tolyl)-1H-pyrazol-5-yl)urea (**S20**). To a 10 mL round bottom flask, 3-(*tert*-butyl)-1-(*p*-tolyl)-1H-pyrazol-5-amine (21 mg, 0.09 mmol) was dissolved in 5 mL dry THF. Diphosgene (22  $\mu$ L, 0.18 mmol) was added and the reaction was refluxed for 2 h, cooled to room temperature, and concentrated *in vacuo*. The residue was resuspended in 5 mL of dry THF in which 3-(4-aminophenyl)-1-isopropyl-1H-pyrazolo[3,4-d]pyrimidin-4-amine (25 mg, 0.09 mmol) and DIEA (31  $\mu$ L, 0.18 mmol) was added and the reaction was allowed to stir at room temperature for 4 hours. The reaction was concentrated *in vacuo* and the residue was purified using reverse phase HPLC using a linear 30% - 90% ACN in H<sub>2</sub>O to afford **S20** as a white solid (15 mg, 0.03 mmol).

Yield = 32%. <sup>1</sup>H NMR (400 MHz, Chloroform-*d*) δ 8.32 (s, 1H), 7.61 (d, *J* = 8.4 Hz, 2H), 7.48 (d, *J* = 8.5 Hz, 2H), 7.30 (d, *J* = 7.4 Hz, 2H), 7.19 – 7.07 (m, 2H), 6.57 (s, 1H), 6.38 (s, 1H), 5.44 (s, 2H), 5.15 (p, *J* = 13.4, 6.7 Hz, 1H), 2.37 (s, 3H), 1.57 (d, *J* = 6.8 Hz, 6H), 1.36 (s, 9H). HRMS-ESI (m/z): [M + H]<sup>+</sup> calcd for C<sub>29</sub>H<sub>34</sub>N<sub>9</sub>O, 524.2881; found 524.5888.

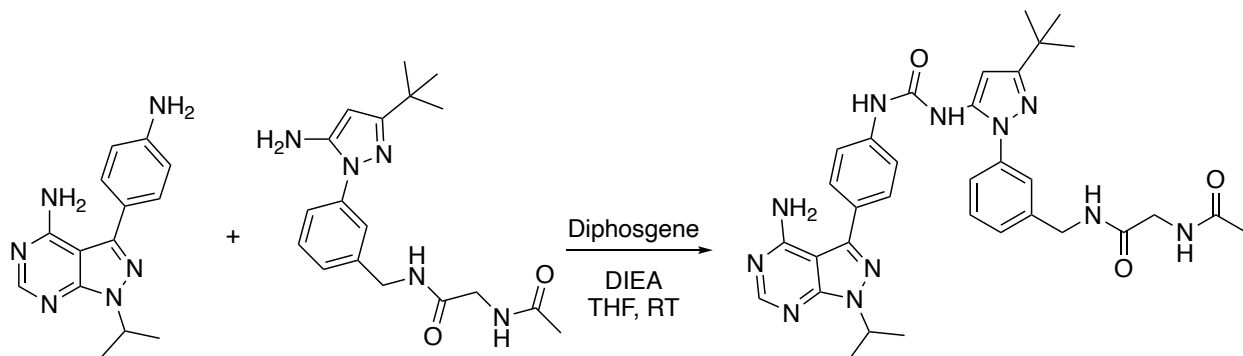

**Scheme S10.** Synthesis of Compound S22

2-acetamido-*N*-(3-(5-(3-(4-(4-amino-1-isopropyl-1*H*-pyrazolo[3,4-*d*]pyrimidin-3-yl)phenyl)ureido)-3-(*tert*-butyl)-1*H*-pyrazol-1-yl)benzyl)acetamide (**S22**). To a 10 mL round bottom flask, 2-acetamido-*N*-(3-(5-amino-3-(*tert*-butyl)-1*H*-pyrazol-1-yl)benzyl)acetamide (31 mg, 0.09 mmol) was dissolved in 5 mL dry THF. Diphosgene (22 μL, 0.18 mmol) was added and the reaction was refluxed for 2 h, cooled to room temperature, and concentrated *in vacuo*. The residue was resuspended in 5 mL of dry THF in which 3-(4-aminophenyl)-1-isopropyl-1*H*-pyrazolo[3,4-*d*]pyrimidin-4-amine (25 mg, 0.09 mmol) and DIEA (31 μL, 0.18 mmol) was added and the reaction was allowed to stir at room temperature for 4 hours. The reaction was concentrated *in vacuo* and the residue was purified using reverse phase HPLC using a linear 30% - 90% ACN in H<sub>2</sub>O to afford **S22** as a white solid (6 mg, 0.01 mmol). Yield = 11%. <sup>1</sup>H NMR (400 MHz, Chloroform-*d*) δ 8.68 (s, 1H), 8.31 (s, 1H), 7.69 (s, 1H), 7.55 (d, *J* = 8.3 Hz, 2H), 7.49 (d, *J* = 8.5 Hz, 2H), 7.43 – 7.30 (m, 3H), 7.26 (d, *J* = 6.8 Hz, 1H), 7.14 (d, *J* = 7.4 Hz, 1H), 6.74 (t, *J* = 5.6 Hz, 1H), 6.51 (s, 1H), 5.55 (s, 2H), 5.14 (p, *J* = 6.8 Hz, 1H), 4.36 (d, *J* = 6.0 Hz, 2H), 3.74 (d, *J* = 5.8 Hz, 2H), 1.96 (s, 3H), 1.56 (d, *J* = 6.7 Hz, 6H), 1.33 (s, 9H). <sup>13</sup>C NMR (126 MHz, dmso) δ 170.08, 169.50, 161.16, 158.46, 155.54, 153.43, 149.67, 147.41, 140.82, 129.50, 129.28, 124.99, 122.01, 121.47, 120.61, 114.51, 87.18, 48.27, 42.59, 42.38, 40.87, 30.65, 22.97, 22.25. HRMS-ESI (m/z): [M + H]<sup>+</sup> calcd for C<sub>33</sub>H<sub>40</sub>N<sub>11</sub>O<sub>3</sub>, 638.3310; found 638.3310.

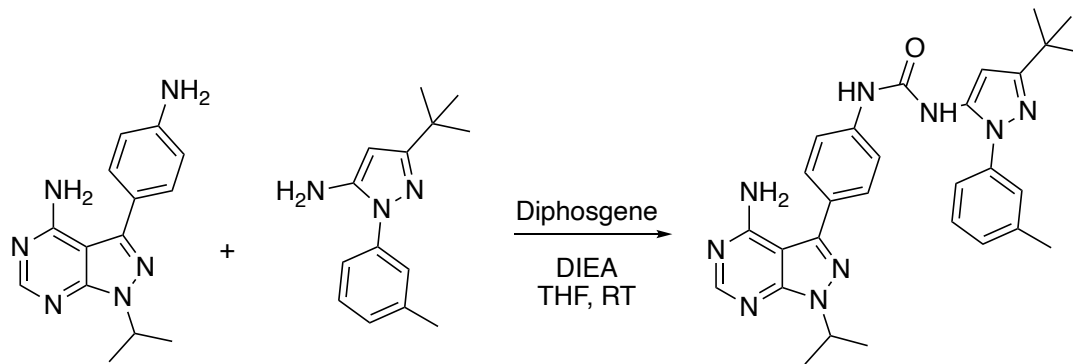

**Scheme S11.** Synthesis of Compound **S23**

1-(4-(4-amino-1-isopropyl-1*H*-pyrazolo[3,4-*d*]pyrimidin-3-yl)phenyl)-3-(3-(*tert*-butyl)-1-(*m*-tolyl)-1*H*-pyrazol-5-yl)urea (**S23**). To a 10 mL round bottom flask, 3-(*tert*-butyl)-1-(*m*-tolyl)-1*H*-pyrazol-5-amine (21 mg, 0.09 mmol) was dissolved in 5 mL dry THF. Diphosgene (22  $\mu$ L, 0.18 mmol) was added and the reaction was refluxed for 2 h, cooled to room temperature, and concentrated *in vacuo*. The residue was resuspended in 5 mL of dry THF in which 3-(4-aminophenyl)-1-isopropyl-1*H*-pyrazolo[3,4-*d*]pyrimidin-4-amine (25 mg, 0.09 mmol) and DIEA (31  $\mu$ L, 0.18 mmol) was added and the reaction was allowed to stir at room temperature for 4 hours. The reaction was concentrated *in vacuo* and the residue was purified using reverse phase HPLC using a linear 30% - 90% ACN in H<sub>2</sub>O to afford **S23** as a white solid (18 mg, 0.04 mmol). Yield = 40%. <sup>1</sup>H NMR (400 MHz, Chloroform-*d*)  $\delta$  8.27 (s, 1H), 7.58 (d, *J* = 8.4 Hz, 2H), 7.51 (s, 1H), 7.45 (d, *J* = 8.4 Hz, 2H), 7.28 (d, *J* = 8.1 Hz, 2H), 7.15 (d, *J* = 8.1 Hz, 2H), 6.91 (s, 1H), 6.38 (s, 1H), 5.56 (s, 2H), 5.13 (p, *J* = 13.4, 6.7 Hz, 1H), 2.29 (s, 3H), 1.56 (d, *J* = 6.7 Hz, 6H), 1.32 (s, 9H). HRMS-ESI (*m/z*): [*M* + *H*]<sup>+</sup> calcd for C<sub>29</sub>H<sub>34</sub>N<sub>9</sub>O, 524.2881; found 524.5883.

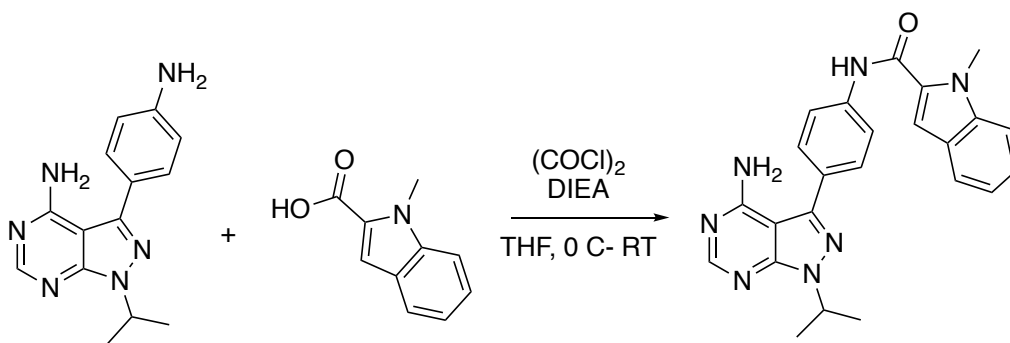

**Scheme S12.** Synthesis of Compound **S24**

*N*-(4-(4-amino-1-isopropyl-1*H*-pyrazolo[3,4-*d*]pyrimidin-3-yl)phenyl)-1-methyl-1*H*-indole-2-carboxamide (**S24**). To a 10 mL round bottom flask, 1-methyl-1*H*-indole-2-carboxylic acid (16 mg, 0.09 mmol) was dissolved in 5 mL dry THF. Oxalyl chloride (23  $\mu$ L, 0.27 mmol) was added and the reaction was refluxed for 2 h, cooled to room temperature, and concentrated *in vacuo*. The residue was resuspended in 5 mL of dry THF in which 3-(4-aminophenyl)-1-isopropyl-1*H*-pyrazolo[3,4-*d*]pyrimidin-4-amine (25 mg, 0.09 mmol) and DIEA (31  $\mu$ L, 0.18 mmol) was added and the reaction was allowed to stir at room temperature for 4 hours. The reaction was concentrated

*in vacuo* and the residue was purified using reverse phase HPLC using a linear 30% - 90% ACN in H<sub>2</sub>O to afford **S24** as a white solid (27 mg, 0.06 mmol). Yield = 70%. <sup>1</sup>H NMR (500 MHz, DMSO-*d*<sub>6</sub>) δ 10.52 (s, 1H), 8.24 (s, 1H), 7.99 (d, *J* = 8.7 Hz, 2H), 7.72 (d, *J* = 7.9 Hz, 1H), 7.66 (d, *J* = 8.7 Hz, 2H), 7.59 (d, *J* = 8.5 Hz, 1H), 7.37 (s, 1H), 7.33 (t, *J* = 8.2 Hz, 1H), 7.19 – 7.11 (m, 1H), 5.07 (p, *J* = 6.7 Hz, 1H), 4.04 (s, 3H), 1.50 (d, *J* = 6.7 Hz, 6H). <sup>13</sup>C NMR (126 MHz, DMSO) δ 160.99, 158.49, 155.75, 153.68, 143.51, 139.85, 139.20, 132.34, 129.10, 128.63, 125.88, 124.49, 122.22, 120.79, 111.07, 106.27, 97.86, 48.53, 42.53, 31.92, 22.26. HRMS-ESI (*m/z*): [M + H]<sup>+</sup> calcd for C<sub>24</sub>H<sub>24</sub>N<sub>7</sub>O, 426.3027; found 426.3035.

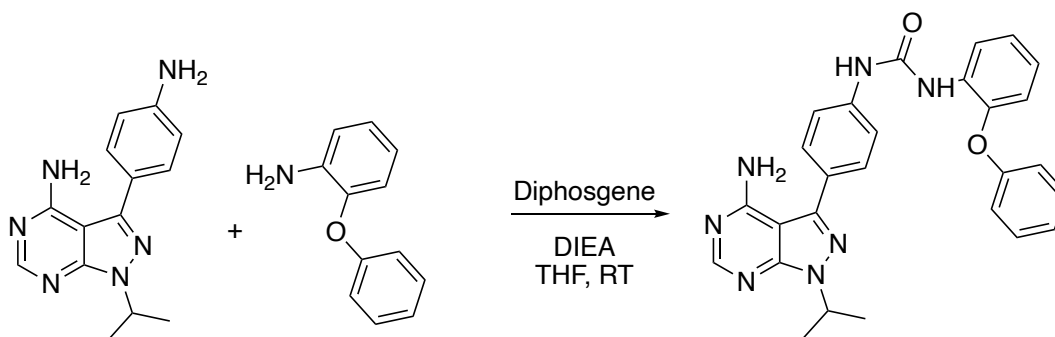

**Scheme S13.** Synthesis of Compound **S25**

1-(4-(4-amino-1-isopropyl-1*H*-pyrazolo[3,4-*d*]pyrimidin-3-yl)phenyl)-3-(2-phenoxyphenyl)urea (**S25**). To a 10 mL round bottom flask, 2-phenoxyaniline (17 mg, 0.09 mmol) was dissolved in 5 mL dry THF. Diphosgene (22 μL, 0.18 mmol) was added and the reaction was refluxed for 2 h, cooled to room temperature, and concentrated *in vacuo*. The residue was resuspended in 5 mL of dry THF in which 3-(4-aminophenyl)-1-isopropyl-1*H*-pyrazolo[3,4-*d*]pyrimidin-4-amine (25 mg, 0.09 mmol) and DIEA (31 μL, 0.18 mmol) was added and the reaction was allowed to stir at room temperature for 4 hours. The reaction was concentrated *in vacuo* and the residue was purified using reverse phase HPLC using a linear 30% - 90% ACN in H<sub>2</sub>O to afford **S25** as a white solid (13 mg, 0.03 mmol). Yield = 30%. <sup>1</sup>H NMR (500 MHz, DMSO-*d*<sub>6</sub>) δ 10.19 (s, 1H), 8.37 (s, 2H), 7.76 (d, *J* = 7.9 Hz, 2H), 7.57 (d, *J* = 7.7 Hz, 2H), 5.07 (p, *J* = 13.3, 6.5 Hz, 1H), 2.98 (s, 3H), 1.48 (d, *J* = 6.4 Hz, 6H). HRMS-ESI (*m/z*): [M + H]<sup>+</sup> calcd for C<sub>27</sub>H<sub>26</sub>N<sub>7</sub>O<sub>2</sub>, 480.2142; found 480.2139.

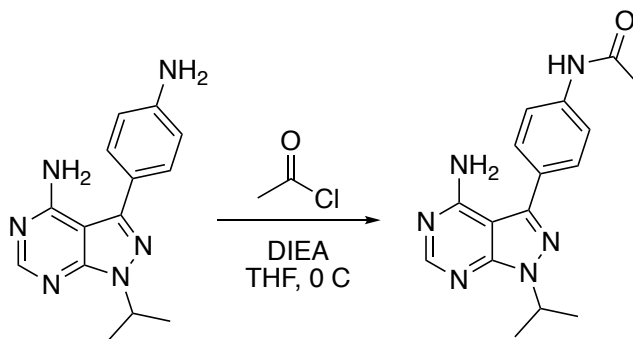

**Scheme S14.** Synthesis of Compound **S26**

(**S26**). To a 10 mL round bottom flask, 3-(4-aminophenyl)-1-isopropyl-1*H*-pyrazolo[3,4-*d*]pyrimidin-4-amine (25 mg, 0.09 mmol) was dissolved in 5 mL dry THF. Acetyl Chloride (7  $\mu$ L, 0.09 mmol) and DIEA (31  $\mu$ L, 0.18 mmol) was added, the reaction was stirred at 0 C for 4 h, and concentrated *in vacuo*. The residue was purified using reverse phase HPLC using a linear 30% - 90% ACN in H<sub>2</sub>O to afford **S26** as a white solid (22 mg, 0.07 mmol). Yield = 80%. <sup>1</sup>H NMR (500 MHz, DMSO-*d*<sub>6</sub>)  $\delta$  10.19 (s, 1H), 8.37 (s, 2H), 7.76 (d, *J* = 7.9 Hz, 2H), 7.57 (d, *J* = 7.7 Hz, 2H), 5.07 (p, *J* = 13.3, 6.5 Hz, 1H), 2.98 (s, 3H), 1.48 (d, *J* = 6.4 Hz, 6H) <sup>13</sup>C NMR (126 MHz, dmso)  $\delta$  169.03, 152.22, 145.18, 140.54, 129.67, 129.21, 126.99, 119.78, 97.31, 49.20, 42.55, 22.19. HRMS-ESI (*m/z*): [M + H]<sup>+</sup> calcd for C<sub>16</sub>H<sub>19</sub>N<sub>6</sub>O, 311.1615; found 311.1615.

#### IV. Analytical data for novel compounds

##### Compound 3:

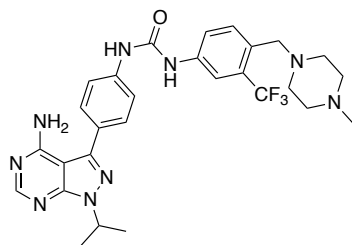

#### <sup>1</sup>H NMR

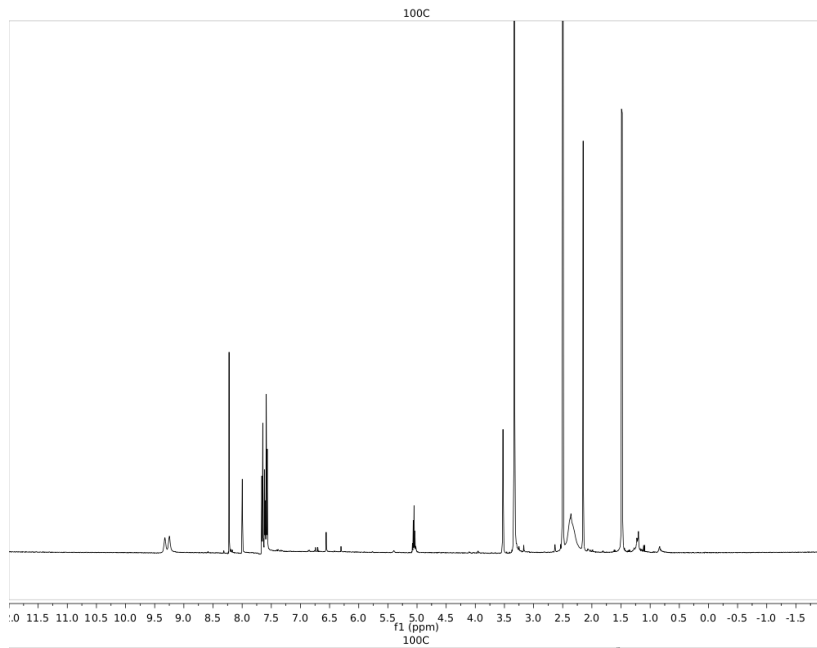

#### <sup>13</sup>C NMR

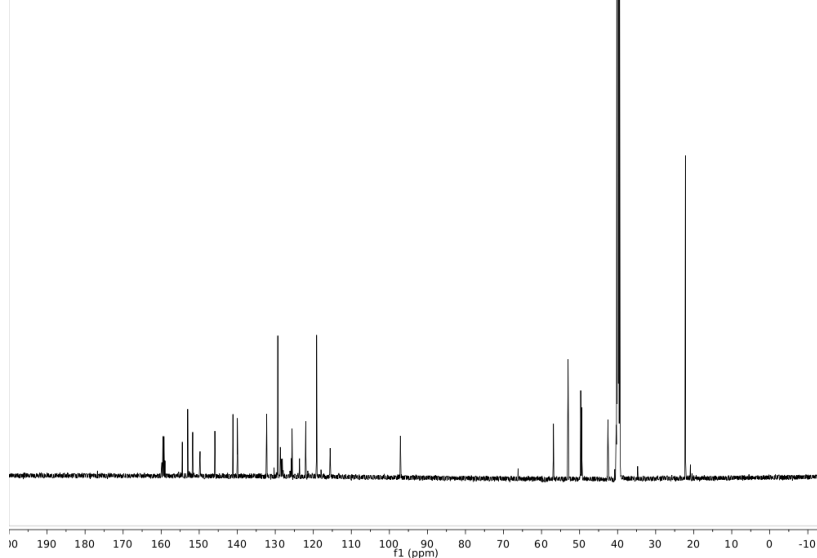

**Compound 6:**

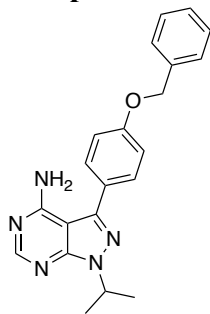

**<sup>1</sup>H NMR**

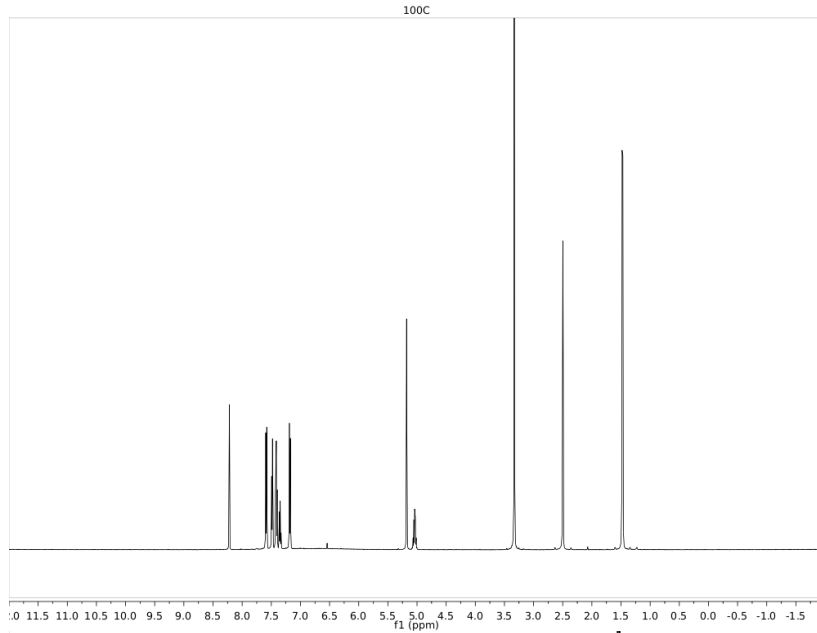

**<sup>13</sup>C NMR**

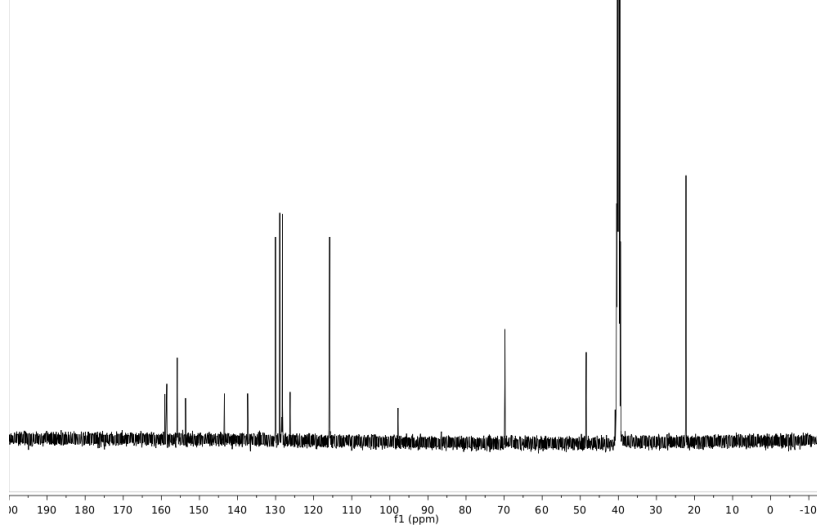

**Compound 7:**

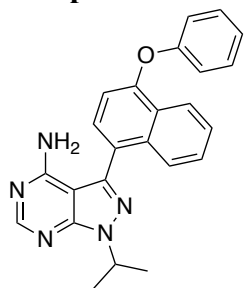

**<sup>1</sup>H NMR**

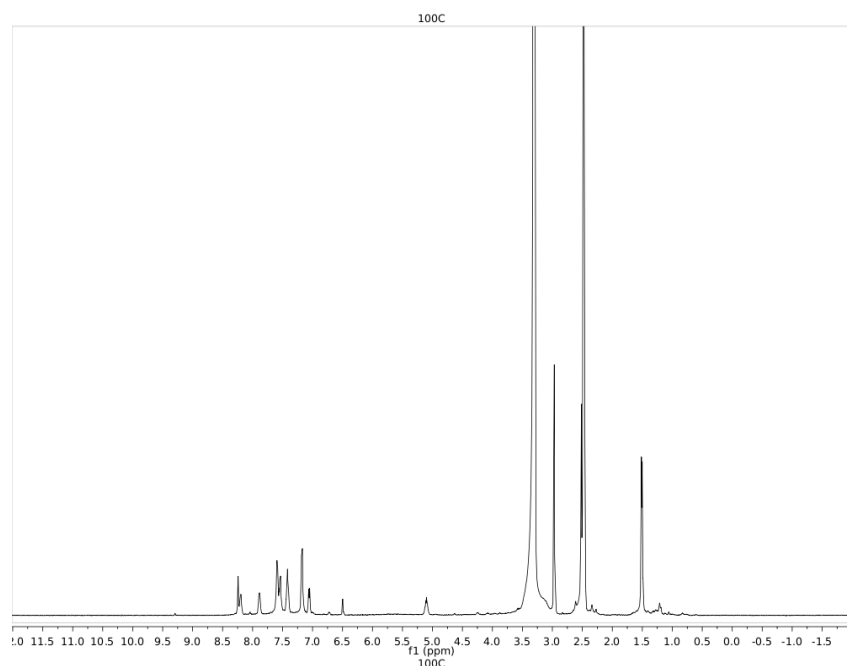

**<sup>13</sup>C NMR**

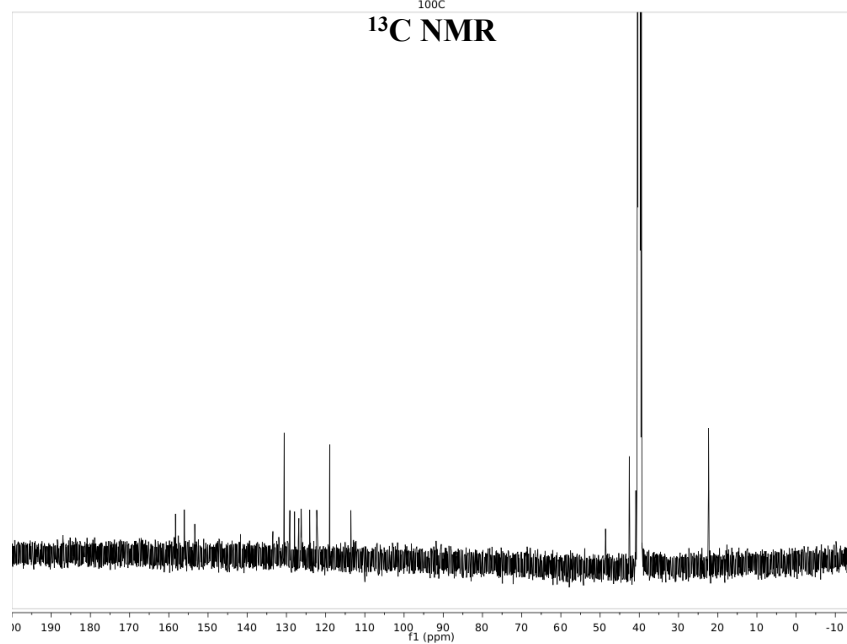



## Compound 8:

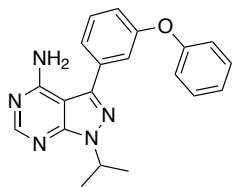

## <sup>1</sup>H NMR

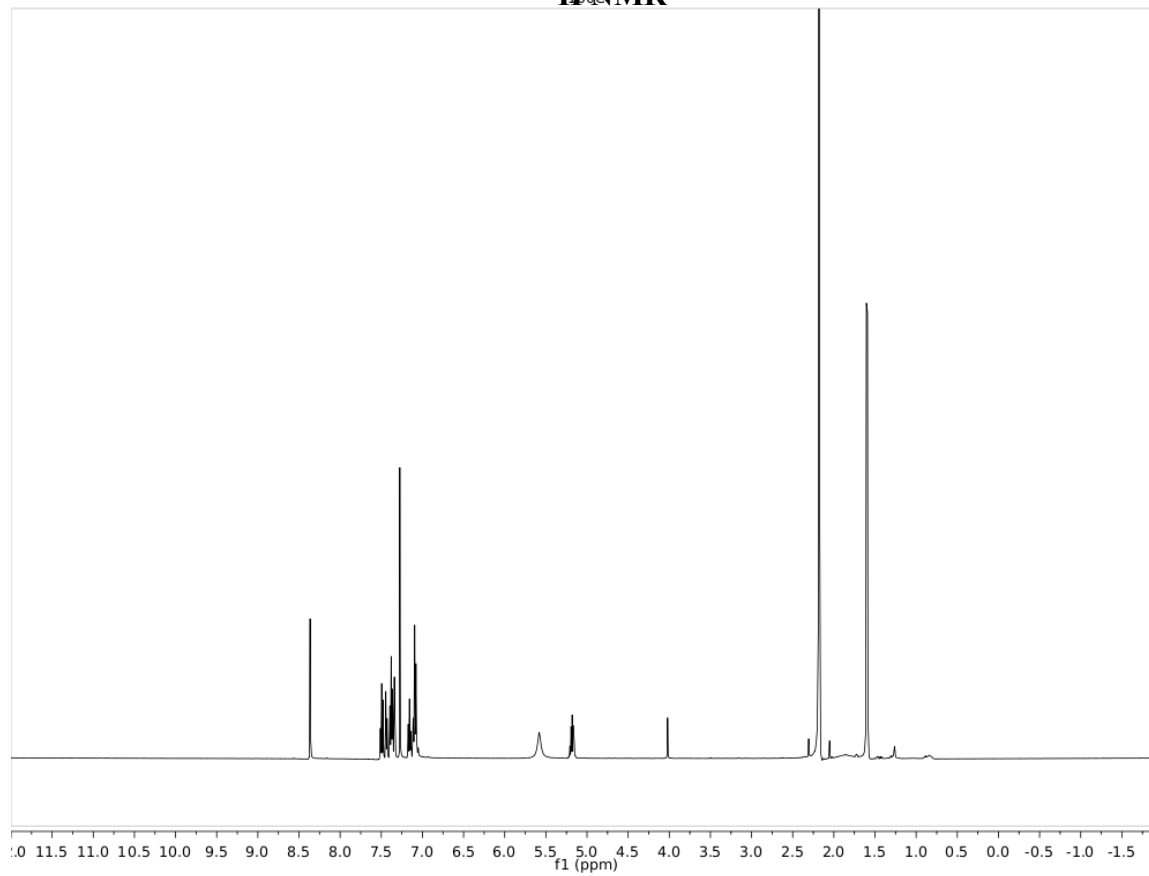

## HPLC:

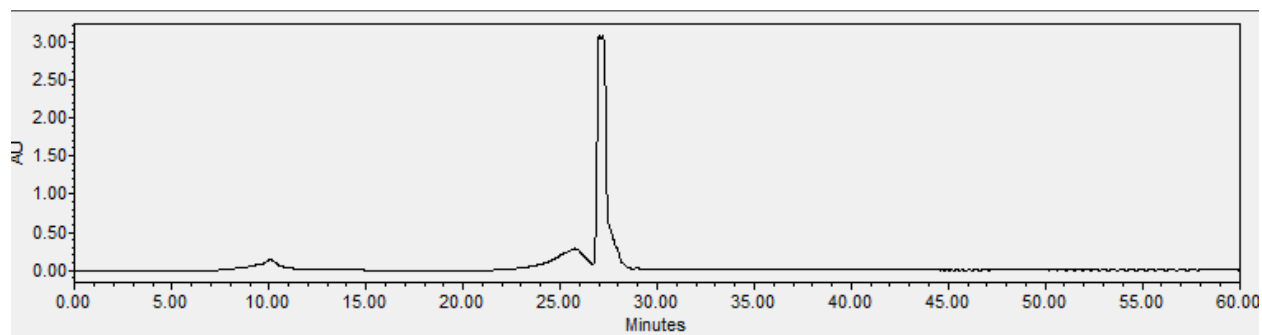

## Compound 9:

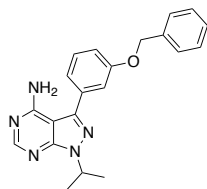

## <sup>1</sup>H NMR

100C

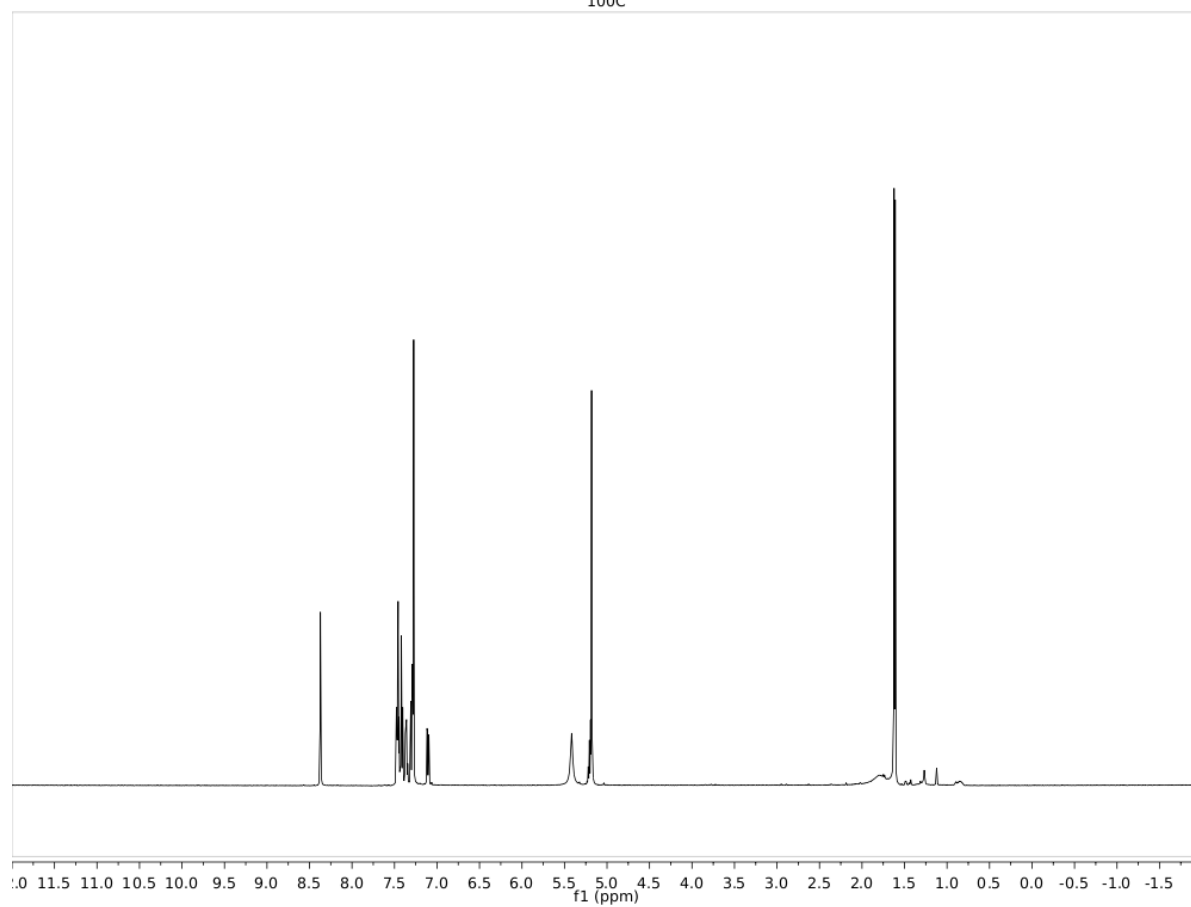

## HPLC:

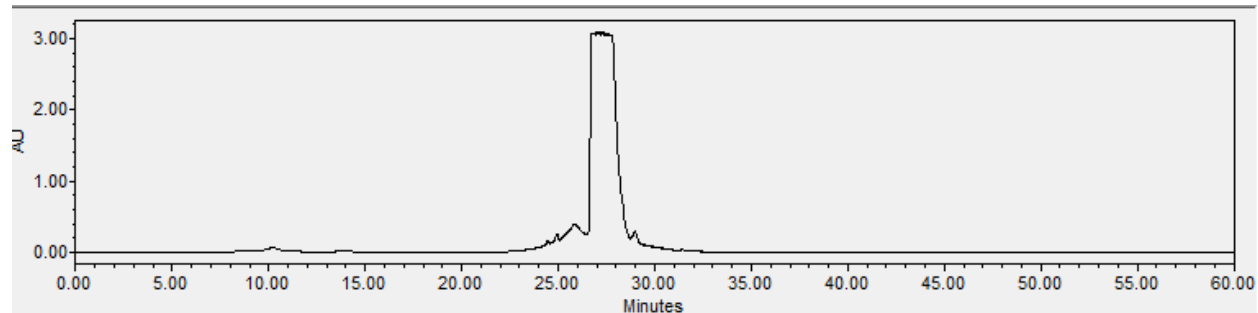

## Compound 12:

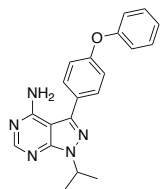

### <sup>1</sup>H NMR

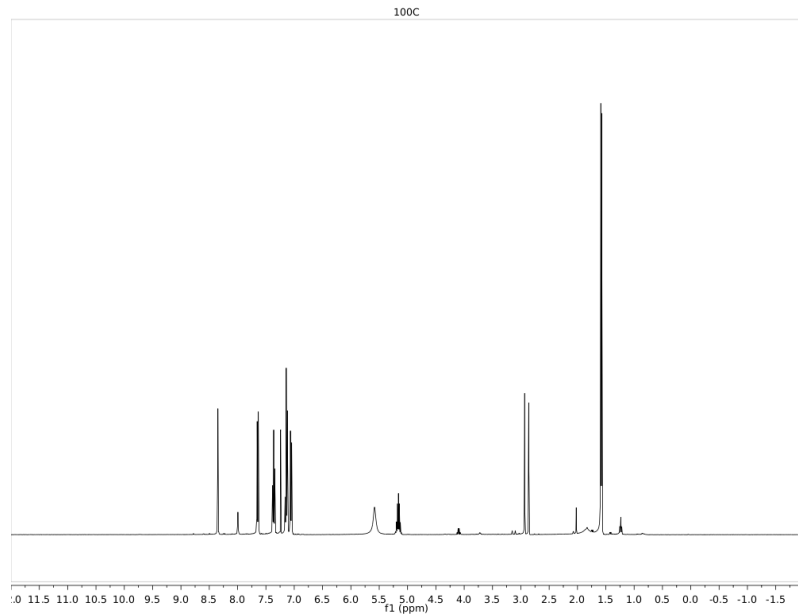

### <sup>13</sup>C NMR

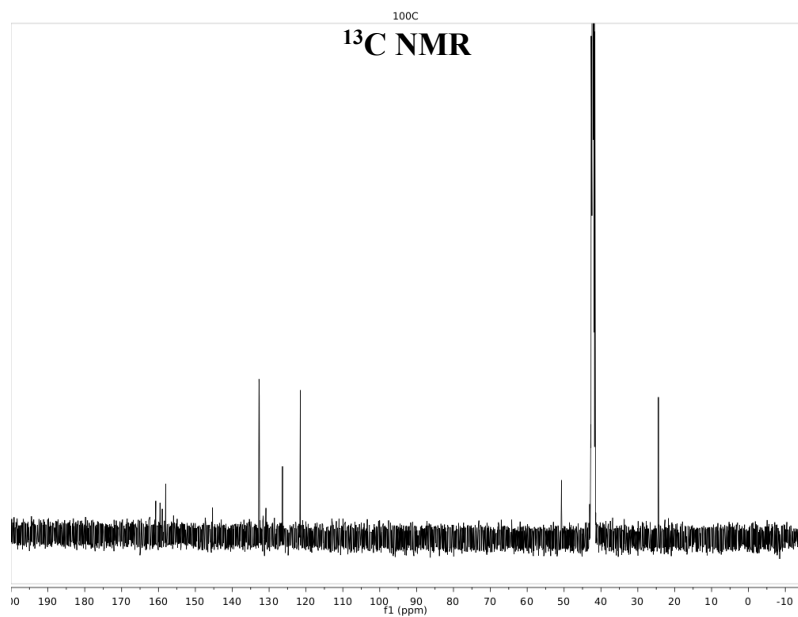

# Compound S16:

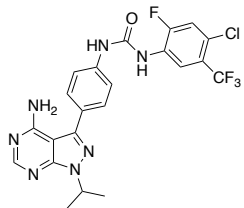

## <sup>1</sup>H NMR

100C

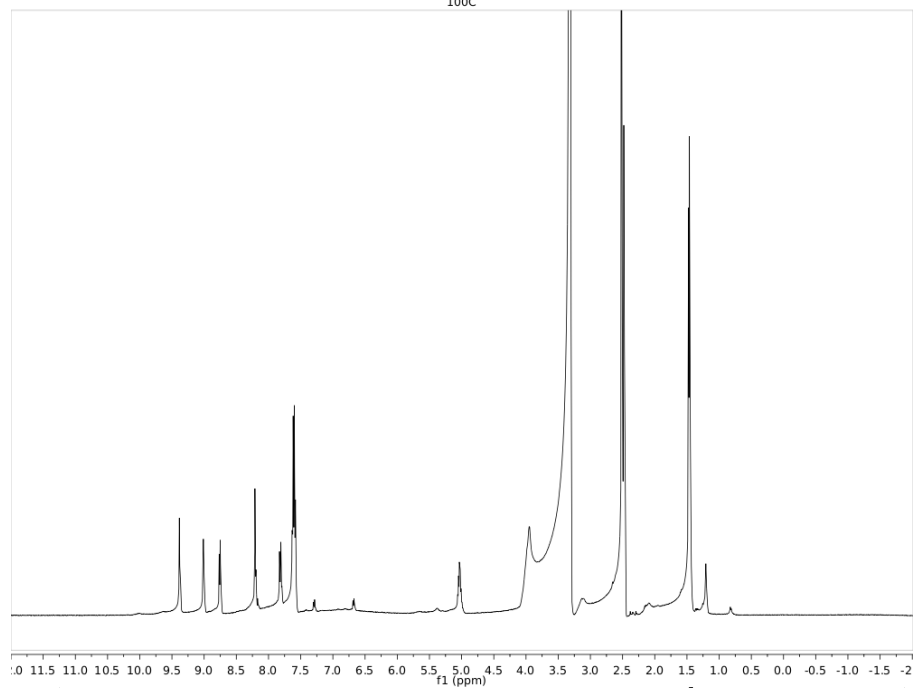

## <sup>13</sup>C NMR

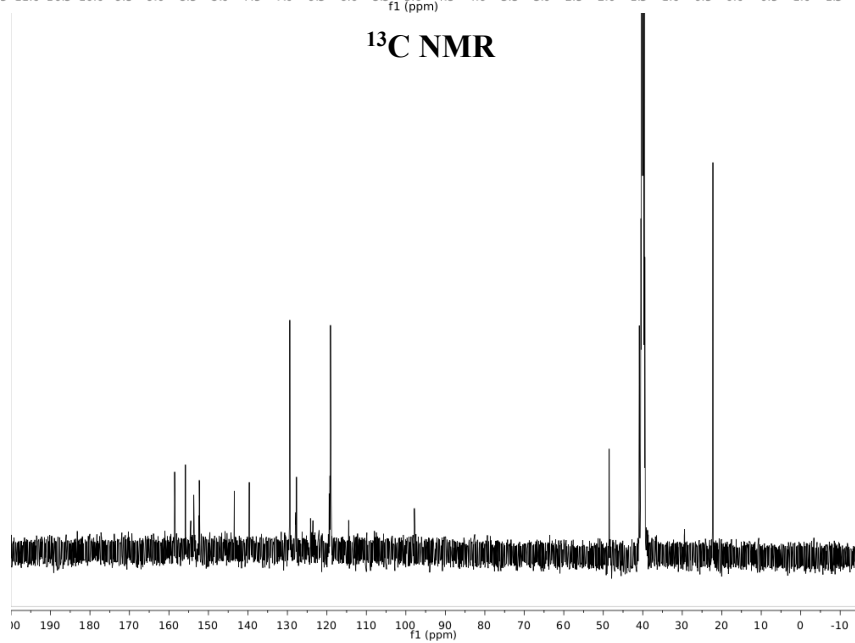

## Compound S19:

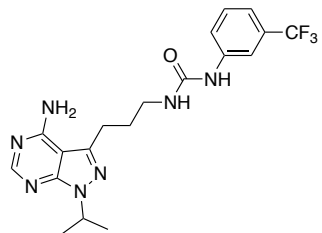

## <sup>1</sup>H NMR:

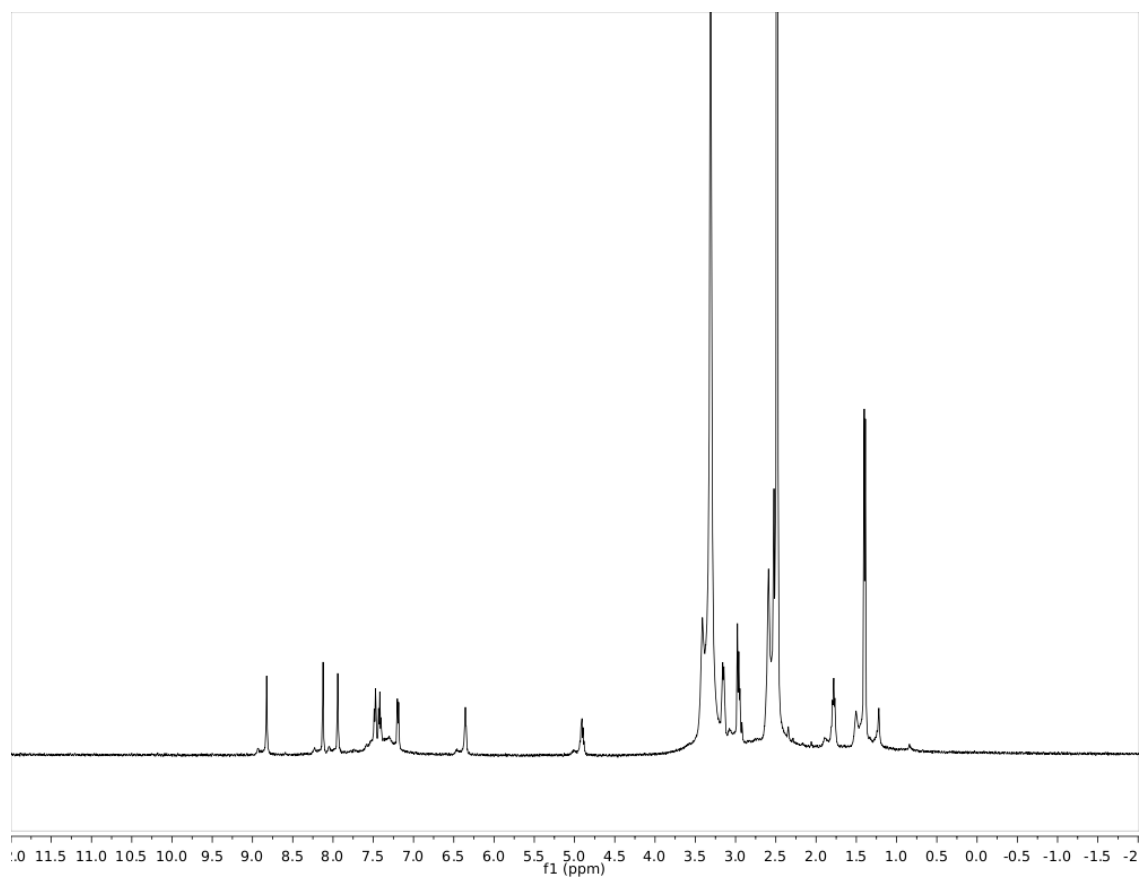

## HPLC:

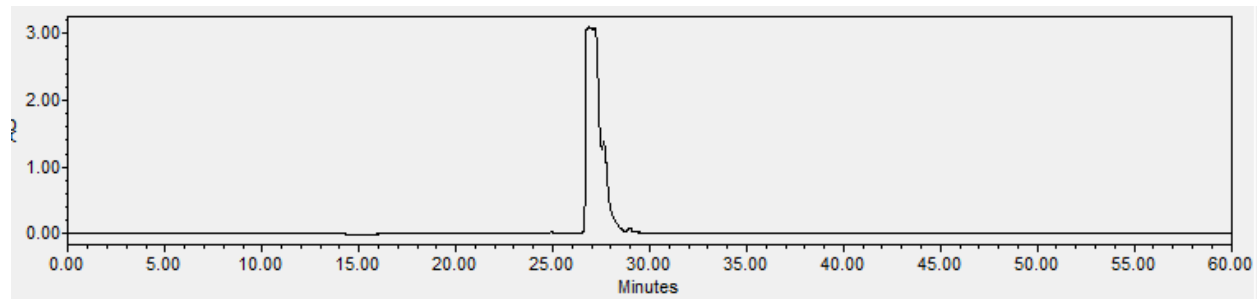

## Compound S20:

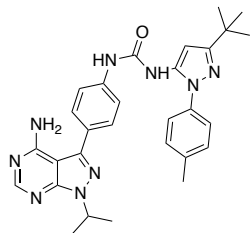

## <sup>1</sup>H NMR

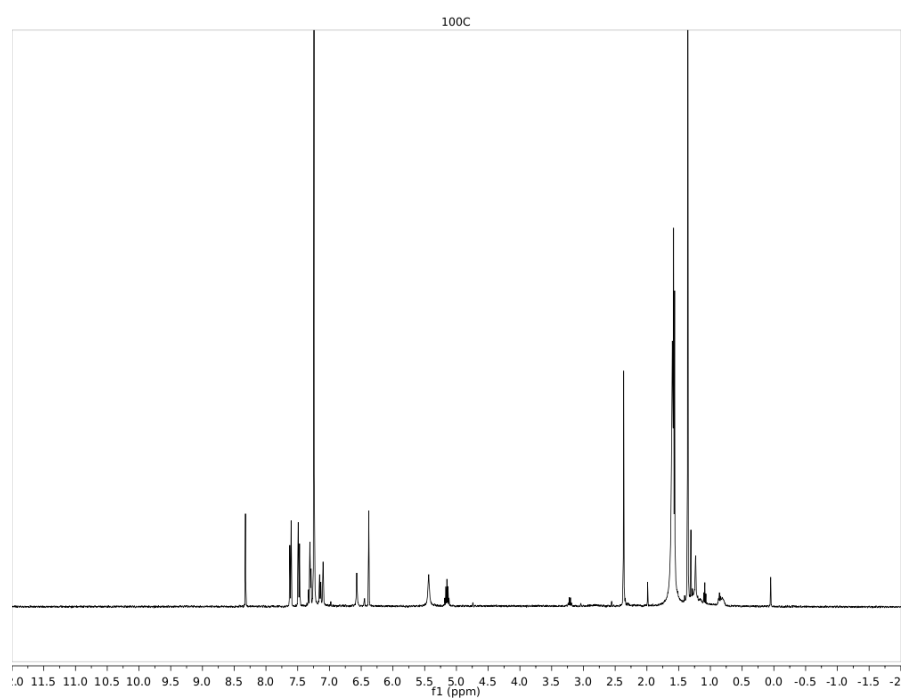

## HPLC:

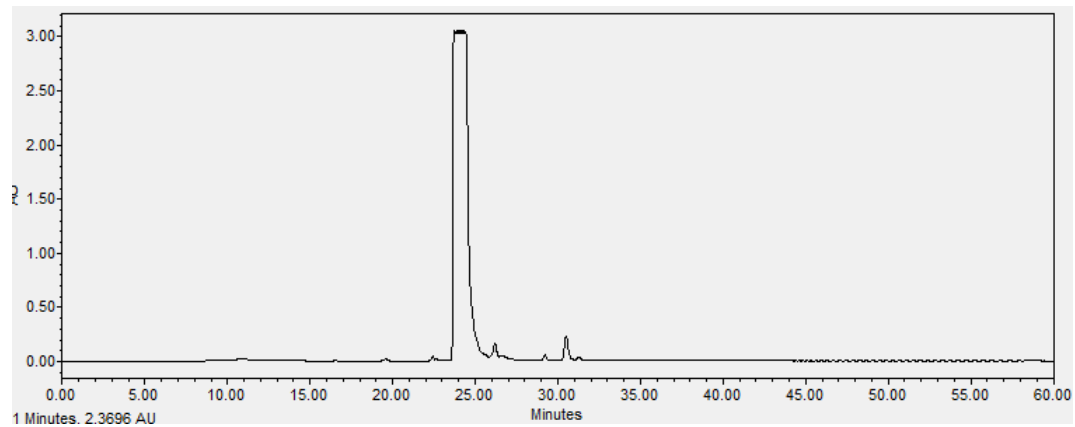

## Compound S22:

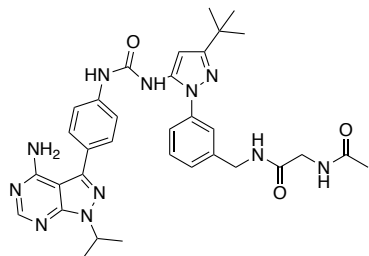

### <sup>1</sup>H NMR

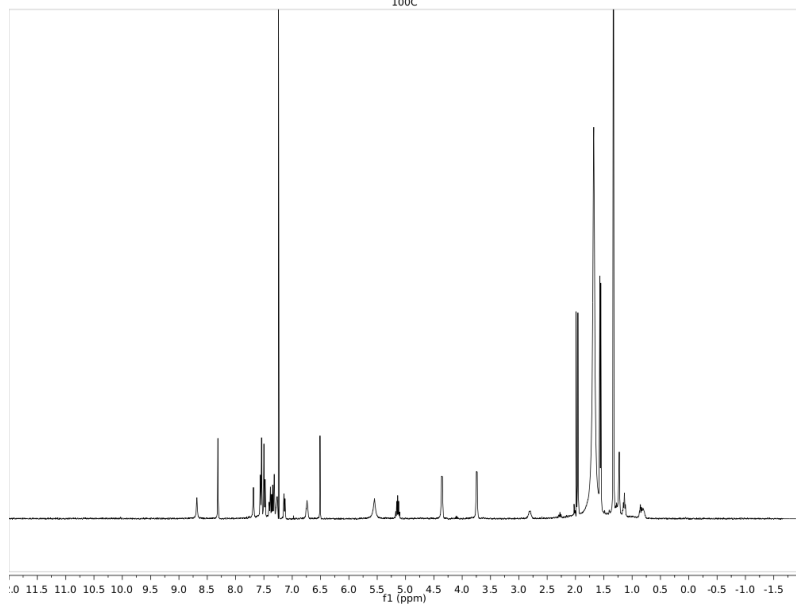

### <sup>13</sup>C NMR

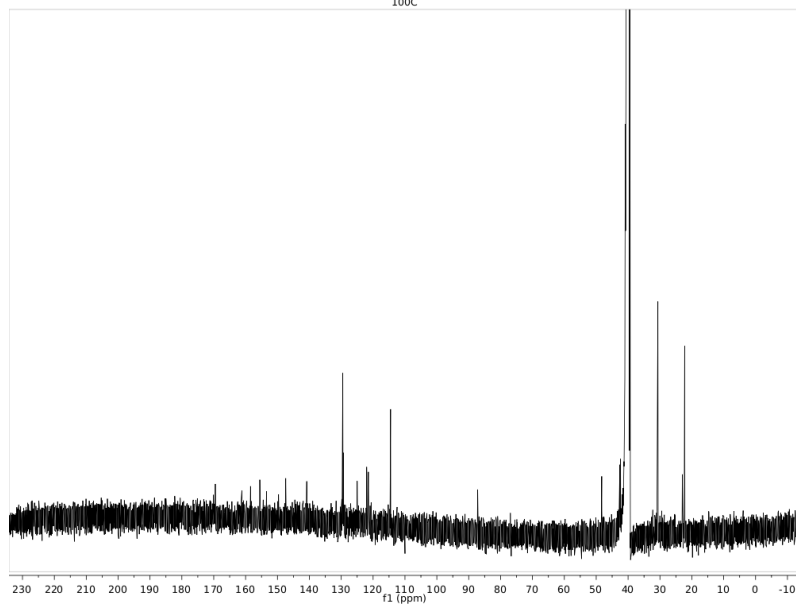

## Compound S23:

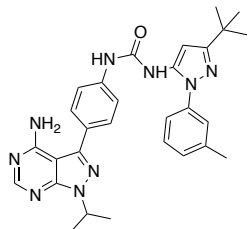

## <sup>1</sup>H NMR

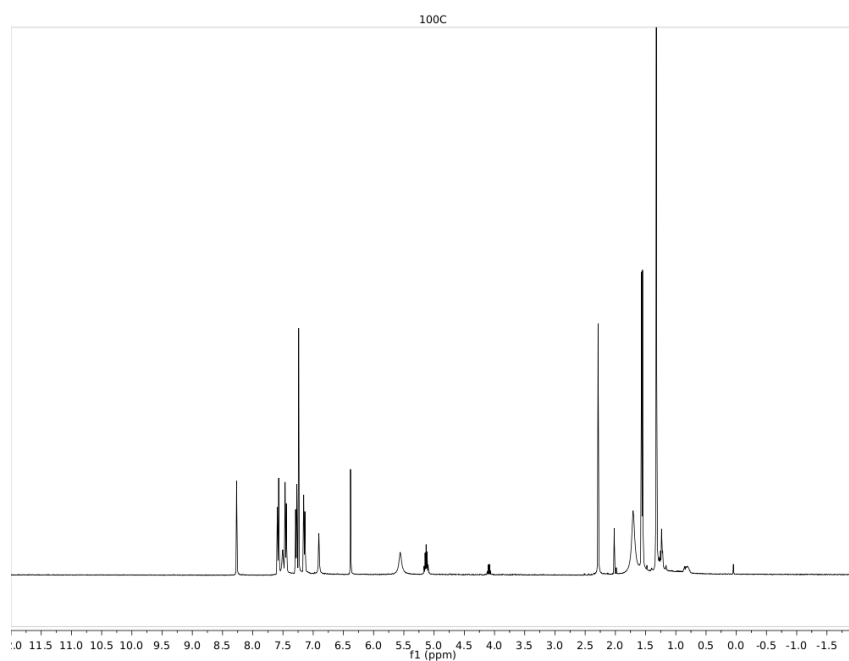

## HPLC:

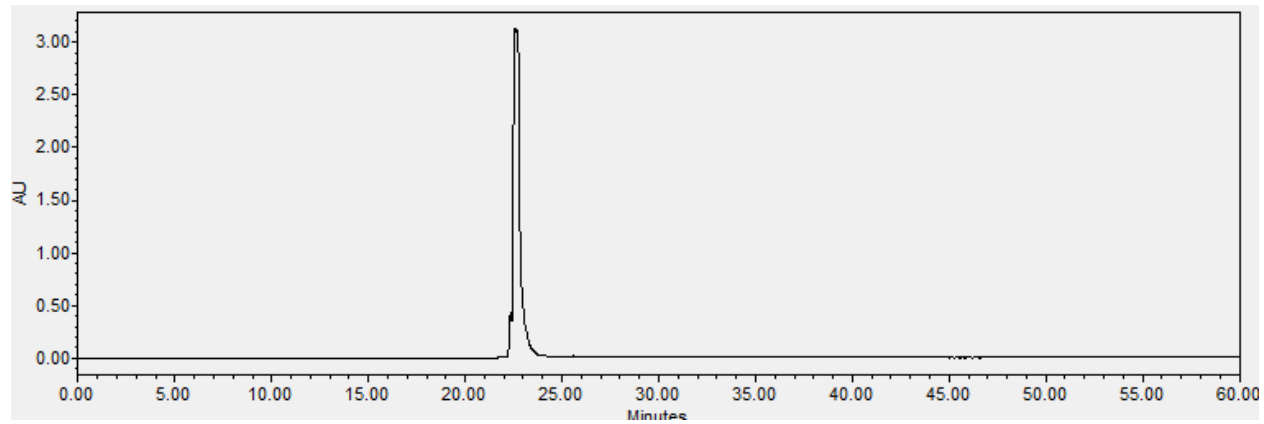



## Compound S24:

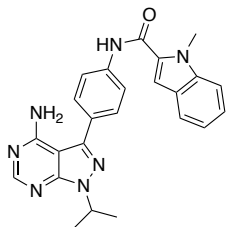

### <sup>1</sup>H NMR

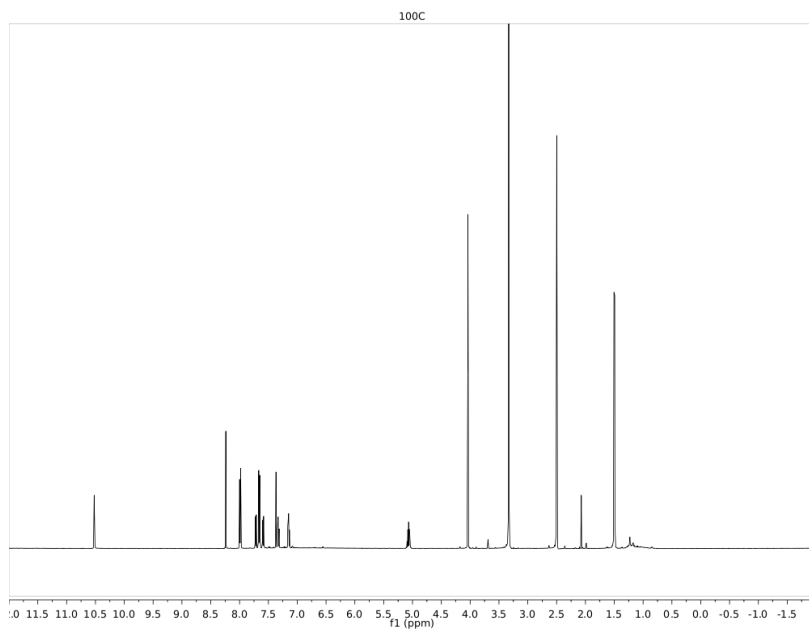

### <sup>13</sup>C NMR

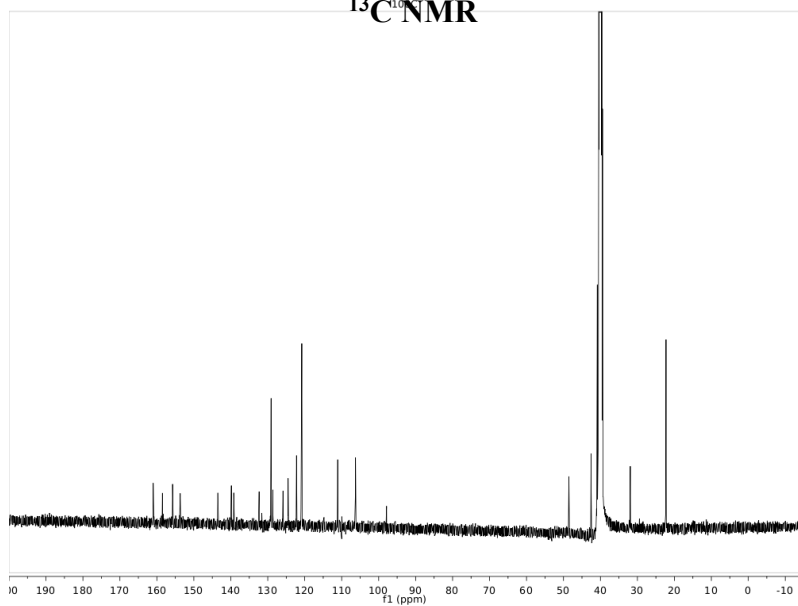

# Compound S26:

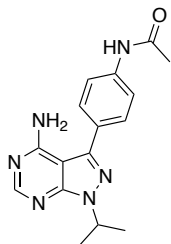

## <sup>1</sup>H NMR

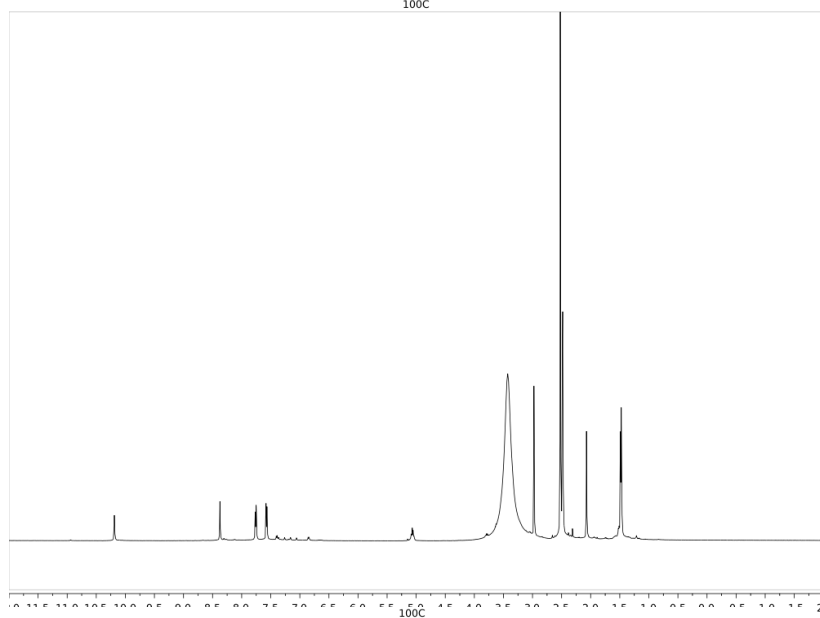

## <sup>13</sup>C NMR

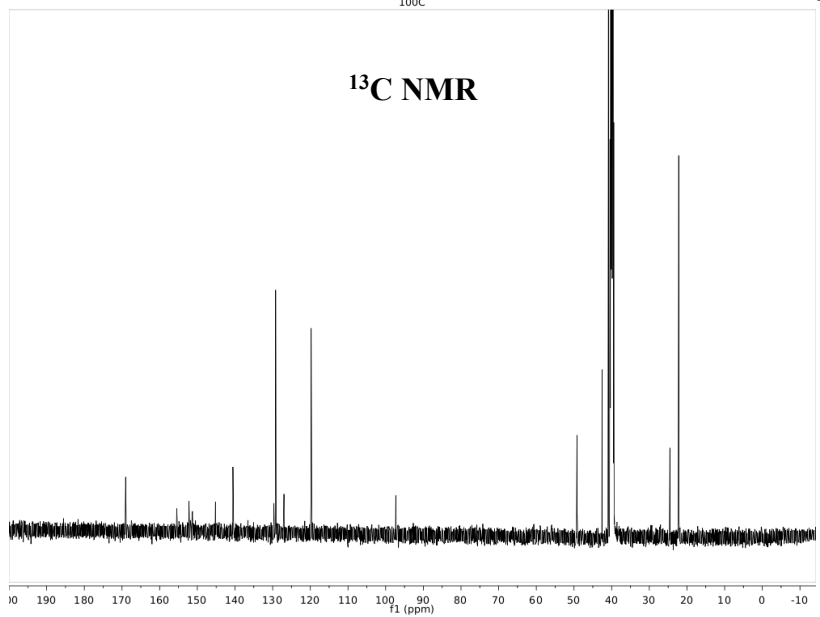

## V. Selective proteolysis method

### *Selective Proteolysis of c-Src General Method*

Limited proteolysis studies were performed as previously reported.<sup>1</sup> c-Src (three domain) was diluted in proteolysis buffer (50 mM Tris-HCl pH 8.0, 100 mM NaCl, 0.5 mM CaCl<sub>2</sub>) to yield a final protein concentration of 2 μM. 1 uL of a 10 mM DMSO stock of the inhibitor was added and incubated with c-Src for 15 mins at room temperature. Thermolysin (purchased from Promega, catalog number: V4001) from a 3.8 μM stock solution was added to the reaction mixture to a final concentration of 60 nM. 15 μL of the proteolysis reaction was added to 5 μL of 50 mM EDTA to quench proteolysis at various time points (0, 2, 5, 10, 30, 60, 90, 120, 180, and 240 mins) and stored at -20 °C. The quenched samples were analyzed by SDS-PAGE (12 % Bis-Tris gel in MES running buffer, staining with comassie blue). Band intensities were analyzed by ImageJ imaging software. Percent full-length protein remaining was plotted against time and fit to an exponential decay equation using GraphPad Prism 6 software to obtain half-lives of each protein. The Exponential Decay curve for each protein was fit using the equation  $Y=(Y_0 - \text{Plateau}) \cdot \exp(-K \cdot X) + \text{Plateau}$  X = time(mins) and Y = normalized band intensity.

### **Annotated example SDS-PAGE gel:**

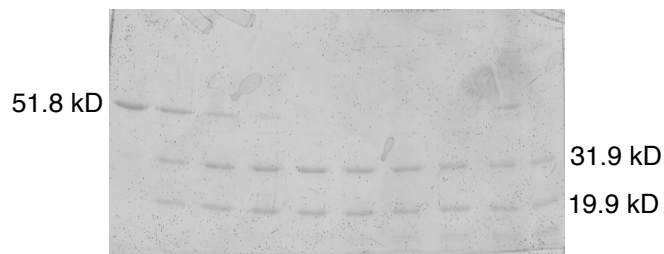

Half-lives are calculated using the full-length (51.8 kD) band intensity.

## VI. Compound table with proteolysis half-lives

| Compound | Structure                                                                           | Half-life (min) |
|----------|-------------------------------------------------------------------------------------|-----------------|
| Vehicle  | Dimethyl sulfoxide                                                                  | 33              |
| 1        | 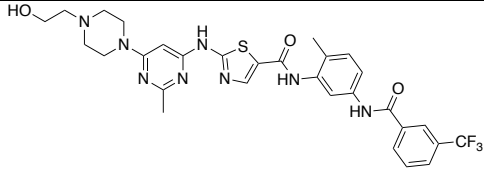   | 2.7             |
| 2        |    | 82              |
| 3        |    | 2.2             |
| 4        |   | 3.7             |
| 5        |  | 16              |
| 6        |  | 85              |
| 7        |  | 91              |

|     |                                                                                     |     |
|-----|-------------------------------------------------------------------------------------|-----|
| 8   | 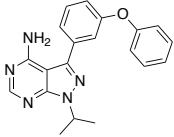   | 94  |
| 9   |    | 159 |
| 10  |    | 4.5 |
| 11  |    | 100 |
| 12  |   | 71  |
| S13 |  | 11  |
| S14 |  | 13  |
| S15 |  | 13  |
| S16 |  | 14  |

|     |                                                                                     |    |
|-----|-------------------------------------------------------------------------------------|----|
| S17 | 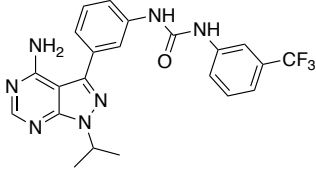   | 16 |
| S18 |    | 23 |
| S19 |    | 24 |
| S20 |   | 42 |
| S21 |  | 44 |
| S22 |  | 44 |

|     |                                                                                    |    |
|-----|------------------------------------------------------------------------------------|----|
| S23 | 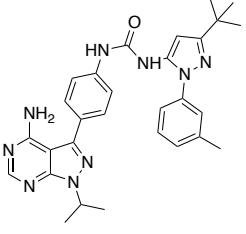  | 49 |
| S24 |   | 51 |
| S25 |   | 70 |
| S26 |  | 84 |

## VII. Selective proteolysis analytical data

**Compound 1** (60  $\mu\text{M}$ ) with 2  $\mu\text{M}$  c-Src & 60 nM Thermolysin  $T_{1/2} = 2.7$  mins

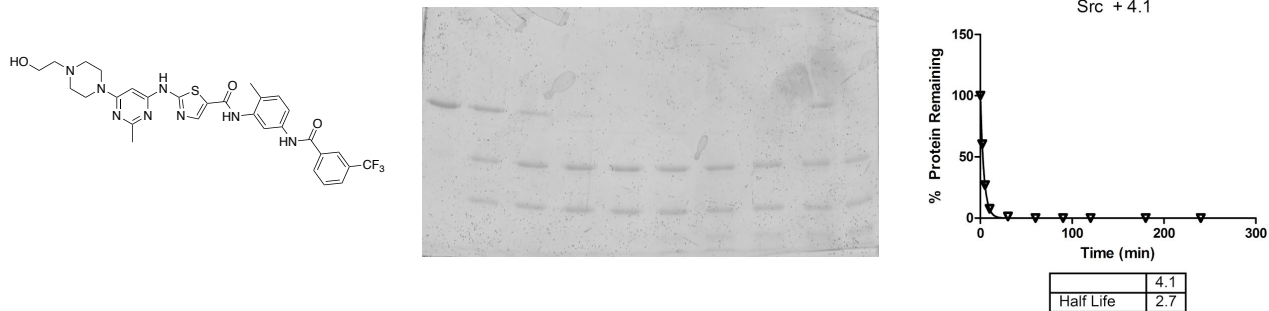

**Compound 2** (60  $\mu\text{M}$ ) with 2  $\mu\text{M}$  c-Src & 60 nM Thermolysin  $T_{1/2} = 82$  mins

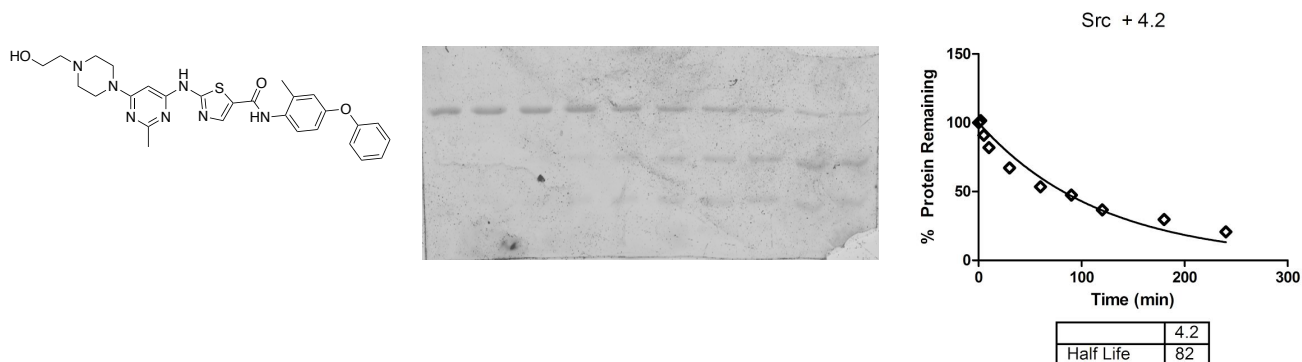

**Compound 3** (60  $\mu\text{M}$ ) with 2  $\mu\text{M}$  c-Src & 60 nM Thermolysin  $T_{1/2} = 2.2$  mins

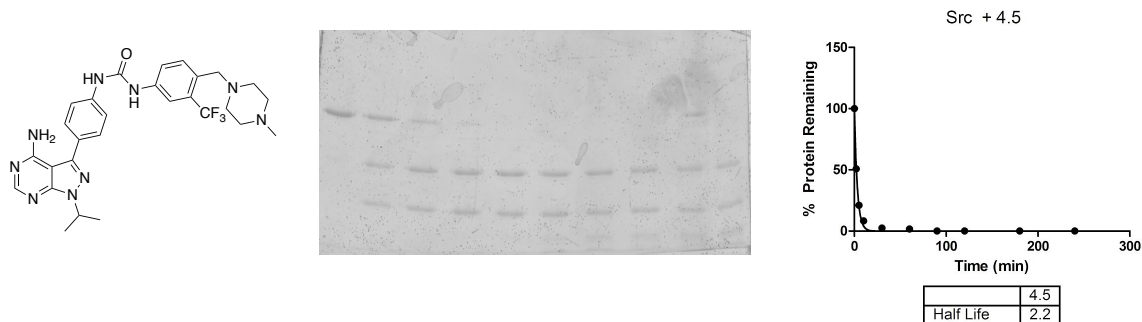



**Compound 4** (60  $\mu$ M) with 2  $\mu$ M c-Src & 60 nM Thermolysin  $T_{1/2} = 3.7$  mins

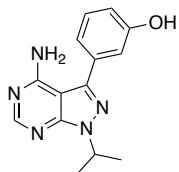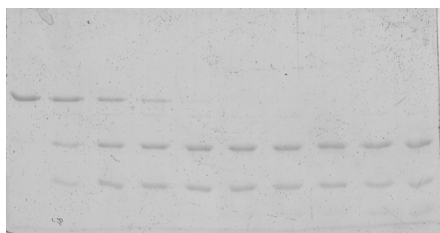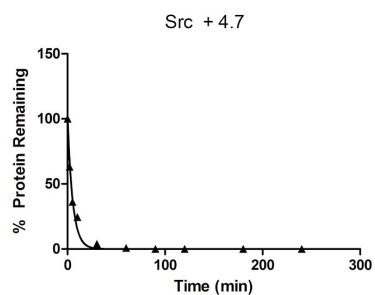

|           |     |
|-----------|-----|
|           | 4.7 |
| Half Life | 3.7 |

**Compound 5** (60  $\mu$ M) with 2  $\mu$ M c-Src & 60 nM Thermolysin  $T_{1/2} = 9.1$  mins

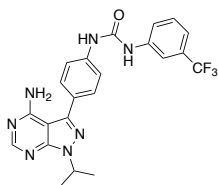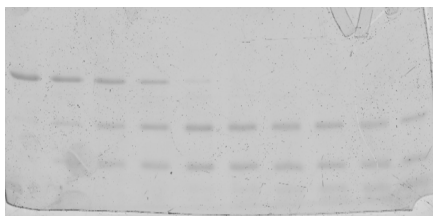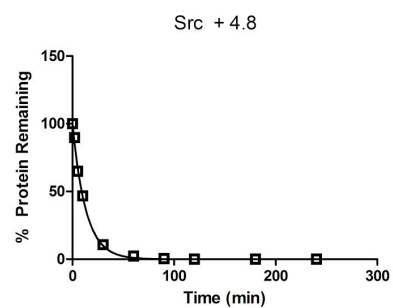

|           |     |
|-----------|-----|
|           | 4.8 |
| Half Life | 9.1 |

**Compound 6** (60  $\mu$ M) with 2  $\mu$ M c-Src & 60 nM Thermolysin  $T_{1/2} = 85$  mins

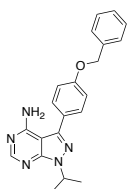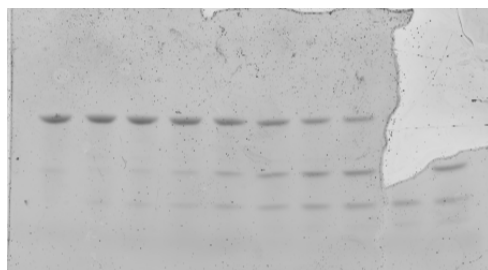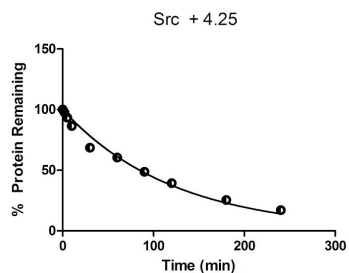

|           |      |
|-----------|------|
|           | 4.25 |
| Half Life | 85   |

**Compound 7** (60  $\mu$ M) with 2  $\mu$ M c-Src & 60 nM Thermolysin  $T_{1/2} = 91$  mins

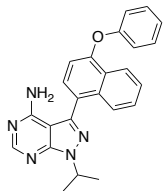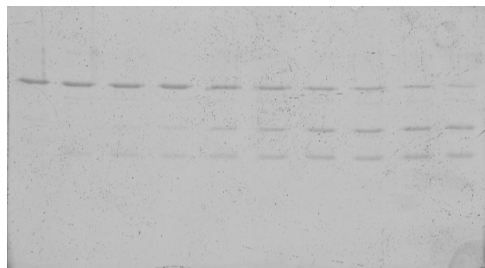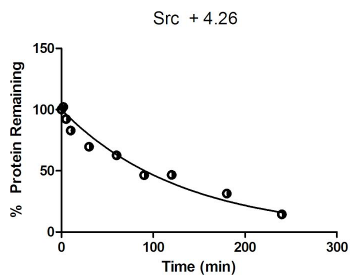

**Compound 8** (60  $\mu$ M) with 2  $\mu$ M c-Src & 60 nM Thermolysin  $T_{1/2} = 94$  mins

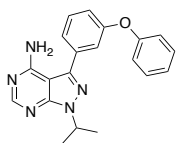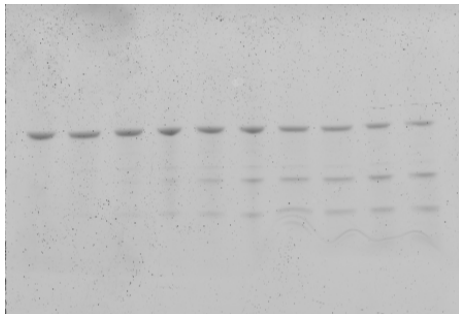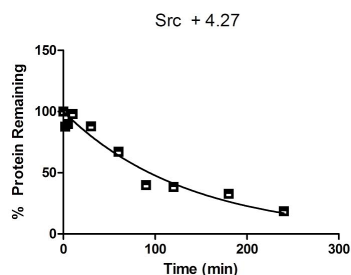

**Compound 9** (60 $\mu$ M) with 2  $\mu$ M c-Src & 60 nM Thermolysin  $T_{1/2} = 159$  mins

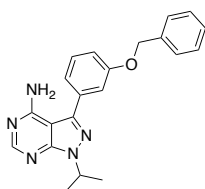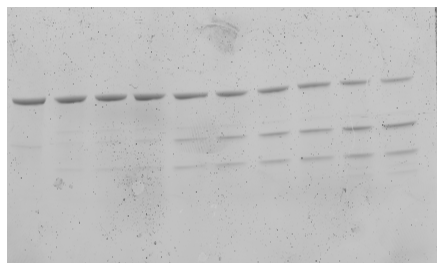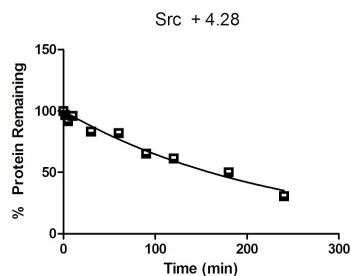

**Compound 10** (60  $\mu$ M) with 2  $\mu$ M c-Src & 60 nM Thermolysin  $T_{1/2} = 4.5$  mins

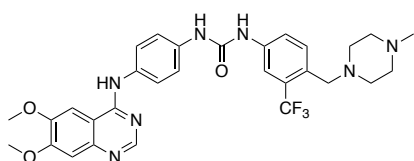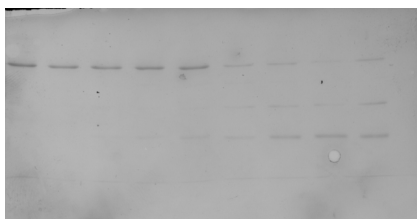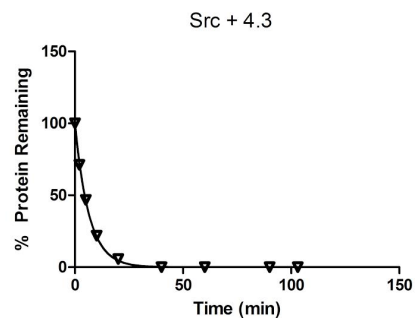

|           |       |
|-----------|-------|
| Half Life | 4.498 |
|-----------|-------|

**Compound 11** (60  $\mu$ M) with 2  $\mu$ M c-Src & 60 nM Thermolysin  $T_{1/2}$  = 100 mins

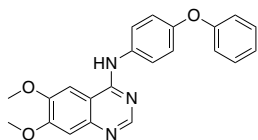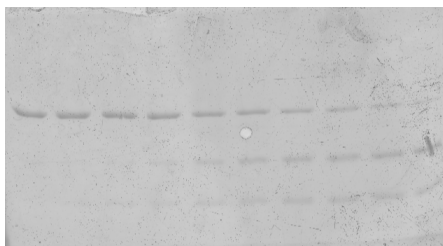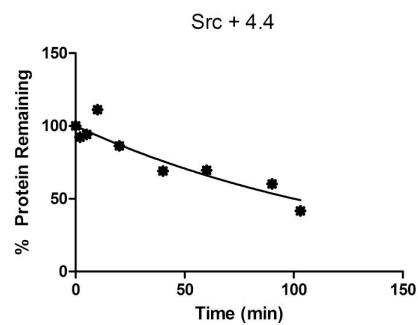

**Compound 12** (60  $\mu$ M) with 2  $\mu$ M c-Src & 60 nM Thermolysin  $T_{1/2}$  = 71 mins

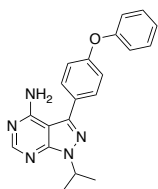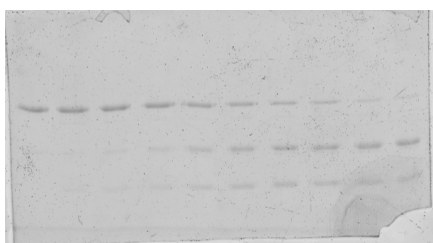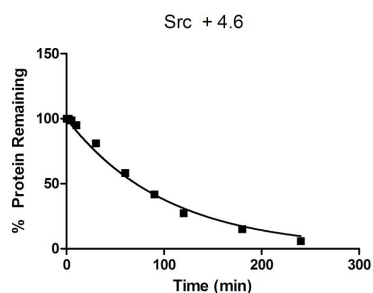

**Compound S13** (60  $\mu$ M) with 2  $\mu$ M c-Src & 60 nM Thermolysin  $T_{1/2}$  = 11 mins

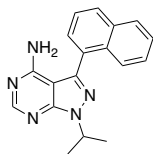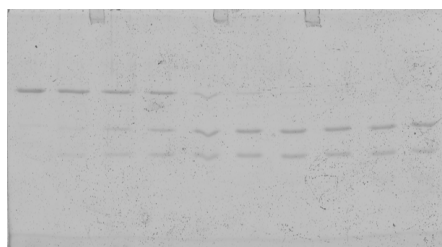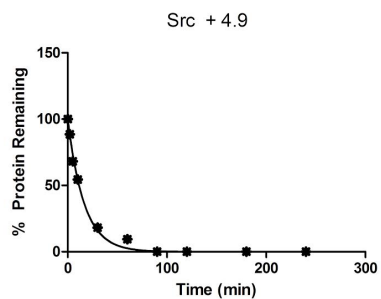

**Compound S14** (60  $\mu$ M) with 2  $\mu$ M c-Src & 60 nM Thermolysin  $T_{1/2}$  = 13 mins

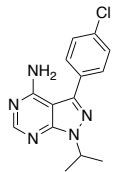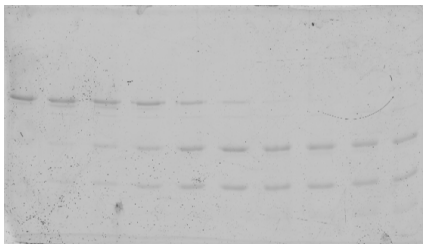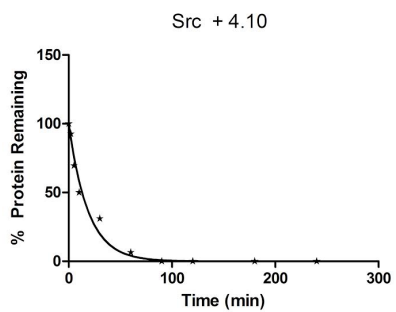

|           |      |
|-----------|------|
|           | 4.10 |
| Half Life | 13   |

**Compound S15** (60  $\mu$ M) with 2  $\mu$ M c-Src & 60 nM Thermolysin  $T_{1/2}$  = 13 mins

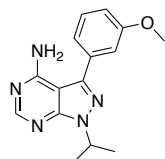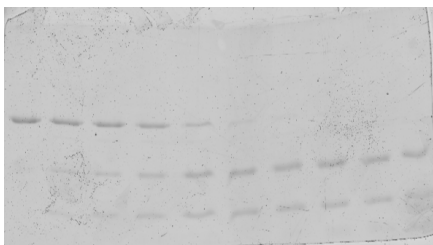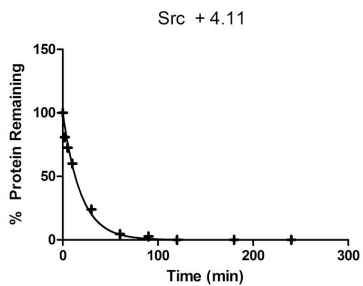

|           |      |
|-----------|------|
|           | 4.11 |
| Half Life | 13   |

**Compound S16** (60  $\mu$ M) with 2  $\mu$ M c-Src & 60 nM Thermolysin  $T_{1/2}$  = 14 mins

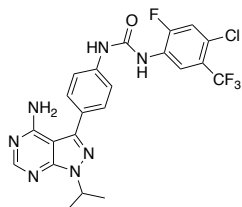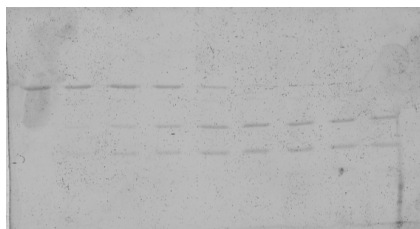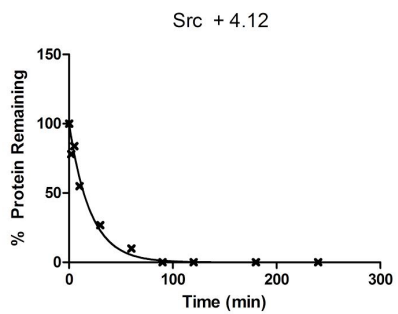

|           |      |
|-----------|------|
|           | 4.12 |
| Half Life | 14   |

**Compound S17** (60  $\mu$ M) with 2  $\mu$ M c-Src & 60 nM Thermolysin  $T_{1/2}$  = 16 mins

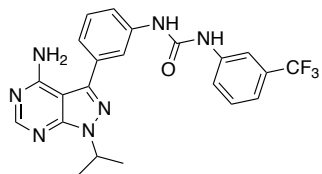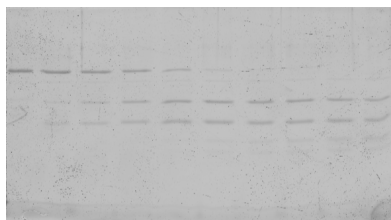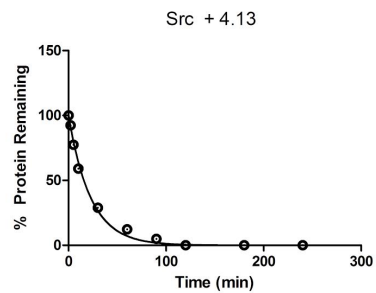

**Compound S18** (60  $\mu$ M) with 2  $\mu$ M c-Src & 60 nM Thermolysin  $T_{1/2}$  = 23 mins

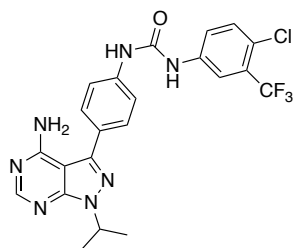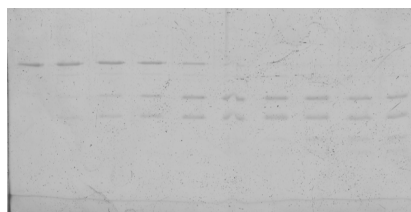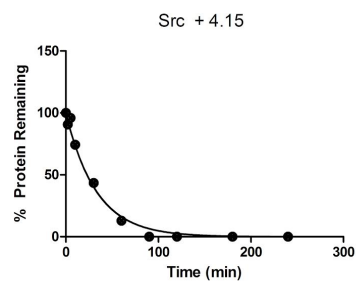

**Compound S19** (60  $\mu$ M) with 2  $\mu$ M c-Src & 60 nM Thermolysin  $T_{1/2}$  = 24 mins

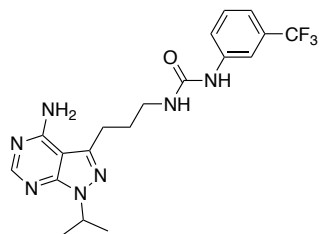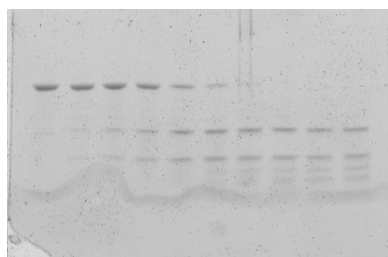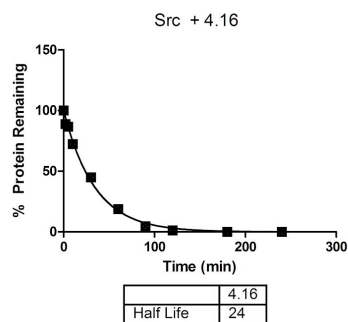

**Compound S20** (60  $\mu$ M) with 2  $\mu$ M c-Src & 60 nM Thermolysin  $T_{1/2}$  = 42 mins

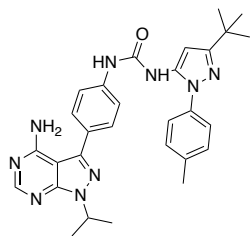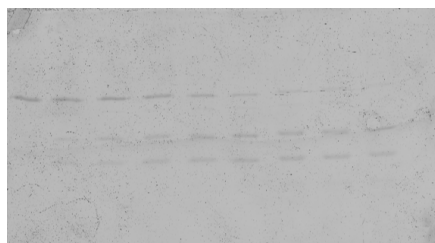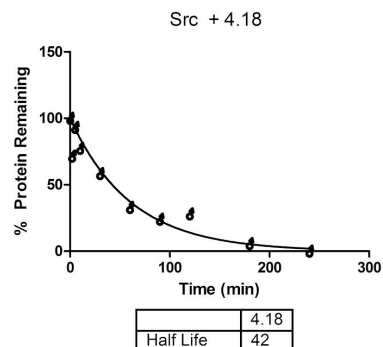

**Compound S21** (60  $\mu$ M) with 2  $\mu$ M c-Src & 60 nM Thermolysin  $T_{1/2} = 44$  mins

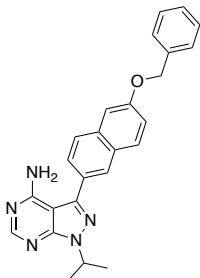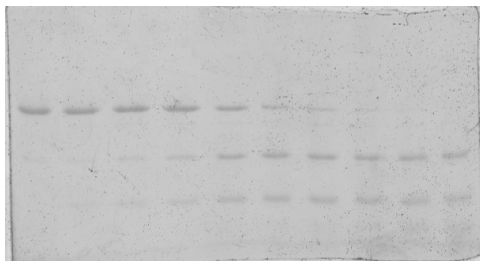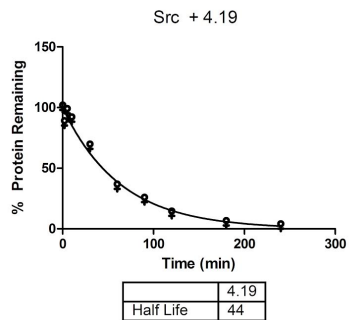

**Compound S22** (60  $\mu$ M) with 2  $\mu$ M c-Src & 60 nM Thermolysin  $T_{1/2} = 44$  mins

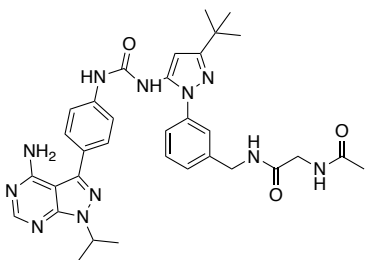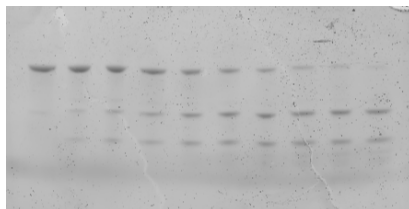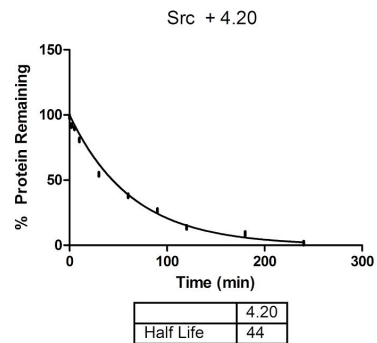

**Compound S23** (60  $\mu$ M) with 2  $\mu$ M c-Src & 60 nM Thermolysin  $T_{1/2} = 49$  mins

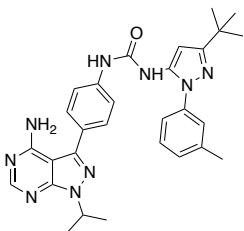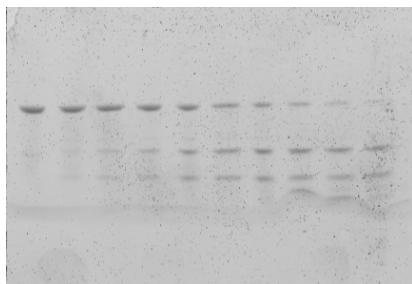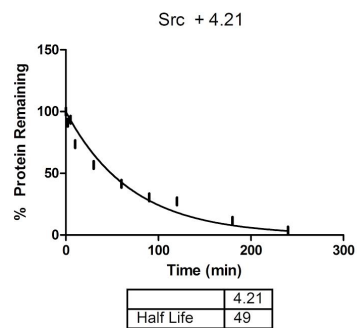

**Compound S24** (60  $\mu$ M) with 2  $\mu$ M c-Src & 60 nM Thermolysin  $T_{1/2} = 51$  mins

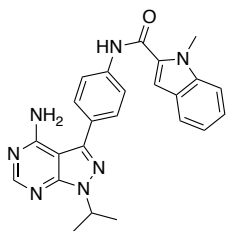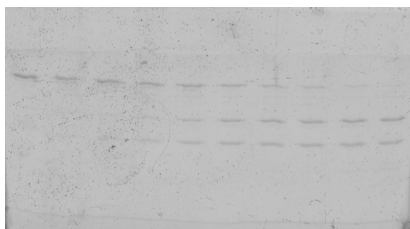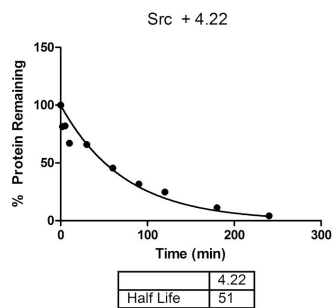

**Compound S25** (60  $\mu$ M) with 2  $\mu$ M c-Src & 60 nM Thermolysin  $T_{1/2} = 70$  mins

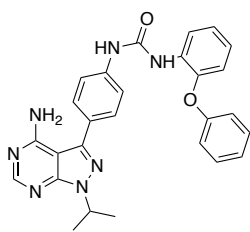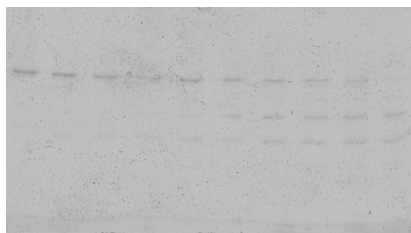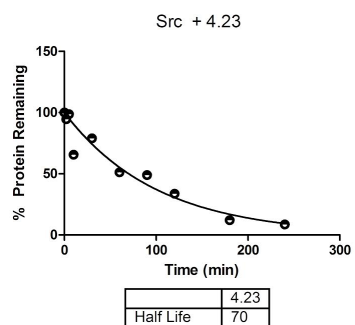

**Compound S26** (60  $\mu$ M) with 2  $\mu$ M c-Src & 60 nM Thermolysin  $T_{1/2} = 84$  mins

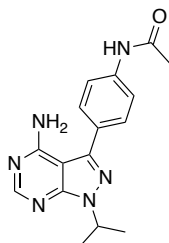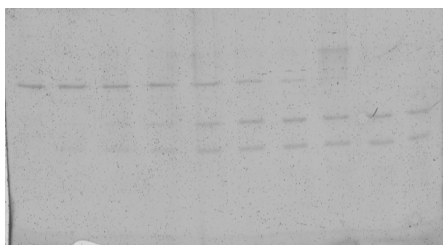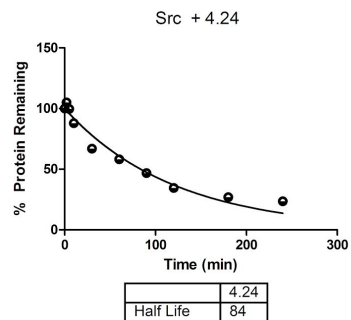

## VIII. Kinome profiling data

### Compound 3

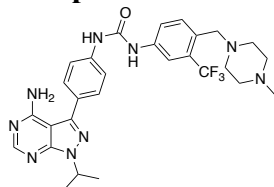

| DiscoverX Gene Symbol         | Entrez Gene Symbol | Percent Control | Compound |
|-------------------------------|--------------------|-----------------|----------|
| AAK1                          | AAK1               | 66              |          |
| ABL1(E255K)-phosphorylated    | ABL1               | 0.1             |          |
| ABL1(F317I)-nonphosphorylated | ABL1               | 1.6             |          |
| ABL1(F317I)-phosphorylated    | ABL1               | 2               |          |
| ABL1(F317L)-nonphosphorylated | ABL1               | 6.5             |          |
| ABL1(F317L)-phosphorylated    | ABL1               | 0.65            |          |
| ABL1(H396P)-nonphosphorylated | ABL1               | 0.15            |          |
| ABL1(H396P)-phosphorylated    | ABL1               | 0               |          |
| ABL1(M351T)-phosphorylated    | ABL1               | 0.35            |          |
| ABL1(Q252H)-nonphosphorylated | ABL1               | 1.1             |          |
| ABL1(Q252H)-phosphorylated    | ABL1               | 0.15            |          |
| ABL1(T315I)-nonphosphorylated | ABL1               | 0.3             |          |
| ABL1(T315I)-phosphorylated    | ABL1               | 0.2             |          |
| ABL1(Y253F)-phosphorylated    | ABL1               | 0.1             |          |
| ABL1-nonphosphorylated        | ABL1               | 0.2             |          |
| ABL1-phosphorylated           | ABL1               | 0.05            |          |
| ABL2                          | ABL2               | 0.05            |          |
| ACVR1                         | ACVR1              | 100             |          |
| ACVR1B                        | ACVR1B             | 75              |          |
| ACVR2A                        | ACVR2A             | 100             |          |
| ACVR2B                        | ACVR2B             | 80              |          |
| ACVRL1                        | ACVRL1             | 73              |          |
| ADCK3                         | CABC1              | 92              |          |
| ADCK4                         | ADCK4              | 82              |          |
| AKT1                          | AKT1               | 100             |          |
| AKT2                          | AKT2               | 62              |          |
| AKT3                          | AKT3               | 11              |          |
| ALK                           | ALK                | 0.85            |          |
| ALK(C1156Y)                   | ALK                | 1.9             |          |
| ALK(L1196M)                   | ALK                | 8.9             |          |
| AMPK-alpha1                   | PRKAA1             | 0.6             |          |



|             |        |      |
|-------------|--------|------|
| AMPK-alpha2 | PRKAA2 | 1.7  |
| ANKK1       | ANKK1  | 1.4  |
| ARK5        | NUAK1  | 56   |
| ASK1        | MAP3K5 | 95   |
| ASK2        | MAP3K6 | 20   |
| AURKA       | AURKA  | 3.7  |
| AURKB       | AURKB  | 2.2  |
| AURKC       | AURKC  | 12   |
| AXL         | AXL    | 2.4  |
| BIKE        | BMP2K  | 80   |
| BLK         | BLK    | 0    |
| BMPR1A      | BMPR1A | 91   |
| BMPR1B      | BMPR1B | 45   |
| BMPR2       | BMPR2  | 100  |
| BMX         | BMX    | 0    |
| BRAF        | BRAF   | 4.3  |
| BRAF(V600E) | BRAF   | 0.65 |
| BRK         | PTK6   | 69   |
| BRSK1       | BRSK1  | 100  |
| BRSK2       | BRSK2  | 100  |
| BTK         | BTK    | 0.75 |
| BUB1        | BUB1   | 95   |
| CAMK1       | CAMK1  | 11   |
| CAMK1B      | PNCK   | 0    |
| CAMK1D      | CAMK1D | 0.85 |
| CAMK1G      | CAMK1G | 30   |
| CAMK2A      | CAMK2A | 69   |
| CAMK2B      | CAMK2B | 45   |
| CAMK2D      | CAMK2D | 94   |
| CAMK2G      | CAMK2G | 72   |
| CAMK4       | CAMK4  | 23   |
| CAMKK1      | CAMKK1 | 7.3  |
| CAMKK2      | CAMKK2 | 2.7  |
| CASK        | CASK   | 91   |
| CDC2L1      | CDK11B | 52   |
| CDC2L2      | CDC2L2 | 42   |
| CDC2L5      | CDK13  | 0.25 |
| CDK11       | CDK19  | 5.5  |
| CDK2        | CDK2   | 0.3  |
| CDK3        | CDK3   | 0.05 |

|                     |          |      |
|---------------------|----------|------|
| CDK4                | CDK4     | 92   |
| CDK4-cyclinD1       | CDK4     | 73   |
| CDK4-cyclinD3       | CDK4     | 51   |
| CDK5                | CDK5     | 0.35 |
| CDK7                | CDK7     | 0.05 |
| CDK8                | CDK8     | 5.7  |
| CDK9                | CDK9     | 6.6  |
| CDKL1               | CDKL1    | 2.1  |
| CDKL2               | CDKL2    | 0    |
| CDKL3               | CDKL3    | 0.55 |
| CDKL5               | CDKL5    | 1.6  |
| CHEK1               | CHEK1    | 91   |
| CHEK2               | CHEK2    | 0    |
| CIT                 | CIT      | 2.9  |
| CLK1                | CLK1     | 0.5  |
| CLK2                | CLK2     | 2.9  |
| CLK3                | CLK3     | 18   |
| CLK4                | CLK4     | 0    |
| CSF1R               | CSF1R    | 0    |
| CSF1R-autoinhibited | CSF1R    | 64   |
| CSK                 | CSK      | 0.75 |
| CSNK1A1             | CSNK1A1  | 51   |
| CSNK1A1L            | CSNK1A1L | 98   |
| CSNK1D              | CSNK1D   | 43   |
| CSNK1E              | CSNK1E   | 34   |
| CSNK1G1             | CSNK1G1  | 79   |
| CSNK1G2             | CSNK1G2  | 100  |
| CSNK1G3             | CSNK1G3  | 97   |
| CSNK2A1             | CSNK2A1  | 77   |
| CSNK2A2             | CSNK2A2  | 100  |
| CTK                 | MATK     | 13   |
| DAPK1               | DAPK1    | 24   |
| DAPK2               | DAPK2    | 18   |
| DAPK3               | DAPK3    | 1.3  |
| DCAMKL1             | DCLK1    | 67   |
| DCAMKL2             | DCLK2    | 85   |
| DCAMKL3             | DCLK3    | 3.8  |
| DDR1                | DDR1     | 0    |
| DDR2                | DDR2     | 0    |
| DLK                 | MAP3K12  | 50   |

|                           |          |      |
|---------------------------|----------|------|
| DMPK                      | DMPK     | 55   |
| DMPK2                     | CDC42BPG | 41   |
| DRAK1                     | STK17A   | 99   |
| DRAK2                     | STK17B   | 76   |
| DYRK1A                    | DYRK1A   | 45   |
| DYRK1B                    | DYRK1B   | 42   |
| DYRK2                     | DYRK2    | 3.5  |
| EGFR                      | EGFR     | 2.8  |
| EGFR(E746-A750del)        | EGFR     | 5.5  |
| EGFR(G719C)               | EGFR     | 5.3  |
| EGFR(G719S)               | EGFR     | 6.5  |
| EGFR(L747-E749del, A750P) | EGFR     | 2.9  |
| EGFR(L747-S752del, P753S) | EGFR     | 2.3  |
| EGFR(L747-T751del,Sins)   | EGFR     | 1.6  |
| EGFR(L858R)               | EGFR     | 2    |
| EGFR(L858R,T790M)         | EGFR     | 1.4  |
| EGFR(L861Q)               | EGFR     | 1    |
| EGFR(S752-I759del)        | EGFR     | 0    |
| EGFR(T790M)               | EGFR     | 1.4  |
| EIF2AK1                   | EIF2AK1  | 65   |
| EPHA1                     | EPHA1    | 30   |
| EPHA2                     | EPHA2    | 1.4  |
| EPHA3                     | EPHA3    | 9.5  |
| EPHA4                     | EPHA4    | 1.8  |
| EPHA5                     | EPHA5    | 3.1  |
| EPHA6                     | EPHA6    | 3    |
| EPHA7                     | EPHA7    | 0.85 |
| EPHA8                     | EPHA8    | 0    |
| EPHB1                     | EPHB1    | 12   |
| EPHB2                     | EPHB2    | 0.8  |
| EPHB3                     | EPHB3    | 56   |
| EPHB4                     | EPHB4    | 45   |
| EPHB6                     | EPHB6    | 1.4  |
| ERBB2                     | ERBB2    | 5.3  |
| ERBB3                     | ERBB3    | 92   |
| ERBB4                     | ERBB4    | 12   |
| ERK1                      | MAPK3    | 98   |
| ERK2                      | MAPK1    | 100  |
| ERK3                      | MAPK6    | 56   |
| ERK4                      | MAPK4    | 97   |

|                       |         |      |
|-----------------------|---------|------|
| ERK5                  | MAPK7   | 78   |
| ERK8                  | MAPK15  | 2.7  |
| ERN1                  | ERN1    | 13   |
| FAK                   | PTK2    | 0.5  |
| FER                   | FER     | 0    |
| FES                   | FES     | 0.3  |
| FGFR1                 | FGFR1   | 0    |
| FGFR2                 | FGFR2   | 0.2  |
| FGFR3                 | FGFR3   | 0.25 |
| FGFR3(G697C)          | FGFR3   | 0    |
| FGFR4                 | FGFR4   | 0    |
| FGR                   | FGR     | 0.3  |
| FLT1                  | FLT1    | 1.5  |
| FLT3                  | FLT3    | 0.25 |
| FLT3(D835H)           | FLT3    | 0.8  |
| FLT3(D835V)           | FLT3    | 0.3  |
| FLT3(D835Y)           | FLT3    | 24   |
| FLT3(ITD)             | FLT3    | 0    |
| FLT3(ITD,D835V)       | FLT3    | 11   |
| FLT3(ITD,F691L)       | FLT3    | 0    |
| FLT3(K663Q)           | FLT3    | 0.25 |
| FLT3(N841I)           | FLT3    | 3.1  |
| FLT3(R834Q)           | FLT3    | 1.9  |
| FLT3-autoinhibited    | FLT3    | 28   |
| FLT4                  | FLT4    | 0    |
| FRK                   | FRK     | 0.1  |
| FYN                   | FYN     | 0.35 |
| GAK                   | GAK     | 31   |
| GCN2(Kin.Dom.2,S808G) | EIF2AK4 | 0    |
| GRK1                  | GRK1    | 93   |
| GRK2                  | ADRBK1  | 96   |
| GRK3                  | ADRBK2  | 65   |
| GRK4                  | GRK4    | 99   |
| GRK7                  | GRK7    | 20   |
| GSK3A                 | GSK3A   | 7.9  |
| GSK3B                 | GSK3B   | 46   |
| HASPIN                | GSG2    | 76   |
| HCK                   | HCK     | 0    |
| HIPK1                 | HIPK1   | 0.1  |
| HIPK2                 | HIPK2   | 0.1  |

|                              |        |      |
|------------------------------|--------|------|
| HIPK3                        | HIPK3  | 0.45 |
| HIPK4                        | HIPK4  | 0.1  |
| HPK1                         | MAP4K1 | 0.15 |
| HUNK                         | HUNK   | 91   |
| ICK                          | ICK    | 24   |
| IGF1R                        | IGF1R  | 3.2  |
| IKK-alpha                    | CHUK   | 0    |
| IKK-beta                     | IKBKB  | 0.05 |
| IKK-epsilon                  | IKBKE  | 21   |
| INSR                         | INSR   | 0.2  |
| INSRR                        | INSRR  | 0    |
| IRAK1                        | IRAK1  | 0    |
| IRAK3                        | IRAK3  | 34   |
| IRAK4                        | IRAK4  | 1.4  |
| ITK                          | ITK    | 0.2  |
| JAK1(JH1domain-catalytic)    | JAK1   | 1.1  |
| JAK1(JH2domain-pseudokinase) | JAK1   | 100  |
| JAK2(JH1domain-catalytic)    | JAK2   | 0.45 |
| JAK3(JH1domain-catalytic)    | JAK3   | 0    |
| JNK1                         | MAPK8  | 12   |
| JNK2                         | MAPK9  | 0.55 |
| JNK3                         | MAPK10 | 36   |
| KIT                          | KIT    | 0    |
| KIT(A829P)                   | KIT    | 4.2  |
| KIT(D816H)                   | KIT    | 2.2  |
| KIT(D816V)                   | KIT    | 0.7  |
| KIT(L576P)                   | KIT    | 0    |
| KIT(V559D)                   | KIT    | 0    |
| KIT(V559D,T670I)             | KIT    | 0.1  |
| KIT(V559D,V654A)             | KIT    | 0.4  |
| KIT-autoinhibited            | KIT    | 55   |
| LATS1                        | LATS1  | 1.6  |
| LATS2                        | LATS2  | 6.3  |
| LCK                          | LCK    | 0    |
| LIMK1                        | LIMK1  | 71   |
| LIMK2                        | LIMK2  | 55   |
| LKB1                         | STK11  | 100  |
| LOK                          | STK10  | 0    |
| LRRK2                        | LRRK2  | 12   |
| LRRK2(G2019S)                | LRRK2  | 25   |

|             |          |      |
|-------------|----------|------|
| LTK         | LTK      | 0    |
| LYN         | LYN      | 0    |
| LZK         | MAP3K13  | 69   |
| MAK         | MAK      | 1.2  |
| MAP3K1      | MAP3K1   | 17   |
| MAP3K15     | MAP3K15  | 8.8  |
| MAP3K2      | MAP3K2   | 0.4  |
| MAP3K3      | MAP3K3   | 0.5  |
| MAP3K4      | MAP3K4   | 15   |
| MAP4K2      | MAP4K2   | 0    |
| MAP4K3      | MAP4K3   | 0.55 |
| MAP4K4      | MAP4K4   | 1.9  |
| MAP4K5      | MAP4K5   | 0.25 |
| MAPKAPK2    | MAPKAPK2 | 100  |
| MAPKAPK5    | MAPKAPK5 | 92   |
| MARK1       | MARK1    | 30   |
| MARK2       | MARK2    | 27   |
| MARK3       | MARK3    | 12   |
| MARK4       | MARK4    | 75   |
| MAST1       | MAST1    | 85   |
| MEK1        | MAP2K1   | 44   |
| MEK2        | MAP2K2   | 39   |
| MEK3        | MAP2K3   | 22   |
| MEK4        | MAP2K4   | 4.5  |
| MEK5        | MAP2K5   | 0.3  |
| MEK6        | MAP2K6   | 45   |
| MELK        | MELK     | 0    |
| MERTK       | MERTK    | 0.7  |
| MET         | MET      | 30   |
| MET(M1250T) | MET      | 4.3  |
| MET(Y1235D) | MET      | 0    |
| MINK        | MINK1    | 2.1  |
| MKK7        | MAP2K7   | 4.3  |
| MKNK1       | MKNK1    | 0    |
| MKNK2       | MKNK2    | 0    |
| MLCK        | MYLK3    | 31   |
| MLK1        | MAP3K9   | 1    |
| MLK2        | MAP3K10  | 0    |
| MLK3        | MAP3K11  | 0.3  |
| MRCKA       | CDC42BPA | 93   |

|           |          |      |
|-----------|----------|------|
| MRCKB     | CDC42BPB | 80   |
| MST1      | STK4     | 0    |
| MST1R     | MST1R    | 8.5  |
| MST2      | STK3     | 5.9  |
| MST3      | STK24    | 3.2  |
| MST4      | MST4     | 1.3  |
| MTOR      | MTOR     | 69   |
| MUSK      | MUSK     | 2.2  |
| MYLK      | MYLK     | 69   |
| MYLK2     | MYLK2    | 3.4  |
| MYLK4     | MYLK4    | 81   |
| MYO3A     | MYO3A    | 0    |
| MYO3B     | MYO3B    | 0    |
| NDR1      | STK38    | 22   |
| NDR2      | STK38L   | 12   |
| NEK1      | NEK1     | 28   |
| NEK10     | NEK10    | 1.4  |
| NEK11     | NEK11    | 47   |
| NEK2      | NEK2     | 62   |
| NEK3      | NEK3     | 83   |
| NEK4      | NEK4     | 1.2  |
| NEK5      | NEK5     | 1.2  |
| NEK6      | NEK6     | 10   |
| NEK7      | NEK7     | 9.6  |
| NEK9      | NEK9     | 0    |
| NIK       | MAP3K14  | 69   |
| NIM1      | MGC42105 | 100  |
| NLK       | NLK      | 16   |
| OSR1      | OXS1     | 0.65 |
| p38-alpha | MAPK14   | 2.4  |
| p38-beta  | MAPK11   | 59   |
| p38-delta | MAPK13   | 0    |
| p38-gamma | MAPK12   | 2.9  |
| PAK1      | PAK1     | 37   |
| PAK2      | PAK2     | 73   |
| PAK3      | PAK3     | 5.2  |
| PAK4      | PAK4     | 84   |
| PAK6      | PAK6     | 75   |
| PAK7      | PAK7     | 87   |
| PCTK1     | CDK16    | 0.2  |

|                       |             |     |
|-----------------------|-------------|-----|
| PCTK2                 | CDK17       | 0   |
| PCTK3                 | CDK18       | 0   |
| PDGFRA                | PDGFRA      | 0.3 |
| PDGFRB                | PDGFRB      | 0   |
| PDPK1                 | PDPK1       | 4.3 |
| PFCDPK1(P.falciparum) | CDPK1       | 0.2 |
| PFPK5(P.falciparum)   | MAL13P1.279 | 98  |
| PFTAIRE2              | CDK15       | 0   |
| PFTK1                 | CDK14       | 0   |
| PHKG1                 | PHKG1       | 96  |
| PHKG2                 | PHKG2       | 58  |
| PIK3C2B               | PIK3C2B     | 100 |
| PIK3C2G               | PIK3C2G     | 99  |
| PIK3CA                | PIK3CA      | 100 |
| PIK3CA(C420R)         | PIK3CA      | 92  |
| PIK3CA(E542K)         | PIK3CA      | 85  |
| PIK3CA(E545A)         | PIK3CA      | 95  |
| PIK3CA(E545K)         | PIK3CA      | 62  |
| PIK3CA(H1047L)        | PIK3CA      | 93  |
| PIK3CA(H1047Y)        | PIK3CA      | 100 |
| PIK3CA(I800L)         | PIK3CA      | 67  |
| PIK3CA(M1043I)        | PIK3CA      | 100 |
| PIK3CA(Q546K)         | PIK3CA      | 96  |
| PIK3CB                | PIK3CB      | 93  |
| PIK3CD                | PIK3CD      | 95  |
| PIK3CG                | PIK3CG      | 100 |
| PIK4CB                | PI4KB       | 73  |
| PIKFYVE               | PIKFYVE     | 100 |
| PIM1                  | PIM1        | 86  |
| PIM2                  | PIM2        | 100 |
| PIM3                  | PIM3        | 93  |
| PIP5K1A               | PIP5K1A     | 92  |
| PIP5K1C               | PIP5K1C     | 100 |
| PIP5K2B               | PIP4K2B     | 100 |
| PIP5K2C               | PIP4K2C     | 90  |
| PKAC-alpha            | PRKACA      | 22  |
| PKAC-beta             | PRKACB      | 12  |
| PKMYT1                | PKMYT1      | 83  |
| PKN1                  | PKN1        | 61  |
| PKN2                  | PKN2        | 79  |



|                               |          |      |
|-------------------------------|----------|------|
| PKNB(M.tuberculosis)          | pknB     | 72   |
| PLK1                          | PLK1     | 100  |
| PLK2                          | PLK2     | 2.5  |
| PLK3                          | PLK3     | 1.9  |
| PLK4                          | PLK4     | 1.5  |
| PRKCD                         | PRKCD    | 5.1  |
| PRKCE                         | PRKCE    | 1.2  |
| PRKCH                         | PRKCH    | 8.1  |
| PRKCI                         | PRKCI    | 6.3  |
| PRKCQ                         | PRKCQ    | 7.8  |
| PRKD1                         | PRKD1    | 18   |
| PRKD2                         | PRKD2    | 1.4  |
| PRKD3                         | PRKD3    | 0    |
| PRKG1                         | PRKG1    | 60   |
| PRKG2                         | PRKG2    | 93   |
| PRKR                          | EIF2AK2  | 33   |
| PRKX                          | PRKX     | 16   |
| PRP4                          | PRPF4B   | 85   |
| PYK2                          | PTK2B    | 0.5  |
| QSK                           | KIAA0999 | 75   |
| RAF1                          | RAF1     | 5.4  |
| RET                           | RET      | 0    |
| RET(M918T)                    | RET      | 0    |
| RET(V804L)                    | RET      | 0    |
| RET(V804M)                    | RET      | 0    |
| RIOK1                         | RIOK1    | 90   |
| RIOK2                         | RIOK2    | 63   |
| RIOK3                         | RIOK3    | 95   |
| RIPK1                         | RIPK1    | 0.05 |
| RIPK2                         | RIPK2    | 8.6  |
| RIPK4                         | RIPK4    | 2.3  |
| RIPK5                         | DSTYK    | 2.6  |
| ROCK1                         | ROCK1    | 1.3  |
| ROCK2                         | ROCK2    | 0    |
| ROS1                          | ROS1     | 5.1  |
| RPS6KA4(Kin.Dom.1-N-terminal) | RPS6KA4  | 0    |
| RPS6KA4(Kin.Dom.2-C-terminal) | RPS6KA4  | 85   |
| RPS6KA5(Kin.Dom.1-N-terminal) | RPS6KA5  | 0.1  |
| RPS6KA5(Kin.Dom.2-C-terminal) | RPS6KA5  | 75   |
| RSK1(Kin.Dom.1-N-terminal)    | RPS6KA1  | 0    |

|                            |         |      |
|----------------------------|---------|------|
| RSK1(Kin.Dom.2-C-terminal) | RPS6KA1 | 50   |
| RSK2(Kin.Dom.1-N-terminal) | RPS6KA3 | 0.05 |
| RSK2(Kin.Dom.2-C-terminal) | RPS6KA3 | 100  |
| RSK3(Kin.Dom.1-N-terminal) | RPS6KA2 | 0.8  |
| RSK3(Kin.Dom.2-C-terminal) | RPS6KA2 | 75   |
| RSK4(Kin.Dom.1-N-terminal) | RPS6KA6 | 0.25 |
| RSK4(Kin.Dom.2-C-terminal) | RPS6KA6 | 57   |
| S6K1                       | RPS6KB1 | 0.1  |
| SBK1                       | SBK1    | 71   |
| SGK                        | SGK1    | 8.4  |
| SgK110                     | SgK110  | 100  |
| SGK2                       | SGK2    | 24   |
| SGK3                       | SGK3    | 1.8  |
| SIK                        | SIK1    | 1.5  |
| SIK2                       | SIK2    | 87   |
| SLK                        | SLK     | 0    |
| SNARK                      | NUAK2   | 38   |
| SNRK                       | SNRK    | 96   |
| SRC                        | SRC     | 0    |
| SRMS                       | SRMS    | 1.6  |
| SRPK1                      | SRPK1   | 98   |
| SRPK2                      | SRPK2   | 70   |
| SRPK3                      | SRPK3   | 100  |
| STK16                      | STK16   | 80   |
| STK33                      | STK33   | 0.1  |
| STK35                      | STK35   | 1.2  |
| STK36                      | STK36   | 20   |
| STK39                      | STK39   | 9.5  |
| SYK                        | SYK     | 0    |
| TAK1                       | MAP3K7  | 0    |
| TAOK1                      | TAOK1   | 0.45 |
| TAOK2                      | TAOK2   | 3.2  |
| TAOK3                      | TAOK3   | 0.3  |
| TBK1                       | TBK1    | 48   |
| TEC                        | TEC     | 29   |
| TESK1                      | TESK1   | 3.2  |
| TGFBR1                     | TGFBR1  | 75   |
| TGFBR2                     | TGFBR2  | 39   |
| TIE1                       | TIE1    | 0    |
| TIE2                       | TEK     | 0    |

|                              |         |      |
|------------------------------|---------|------|
| TLK1                         | TLK1    | 39   |
| TLK2                         | TLK2    | 43   |
| TNIK                         | TNIK    | 0.6  |
| TNK1                         | TNK1    | 0.35 |
| TNK2                         | TNK2    | 0.4  |
| TNNI3K                       | TNNI3K  | 3.8  |
| TRKA                         | NTRK1   | 0.05 |
| TRKB                         | NTRK2   | 0.2  |
| TRKC                         | NTRK3   | 0.05 |
| TRPM6                        | TRPM6   | 71   |
| TSSK1B                       | TSSK1B  | 70   |
| TSSK3                        | TSSK3   | 99   |
| TTK                          | TTK     | 5.3  |
| TXK                          | TXK     | 9.5  |
| TYK2(JH1domain-catalytic)    | TYK2    | 5.3  |
| TYK2(JH2domain-pseudokinase) | TYK2    | 100  |
| TYRO3                        | TYRO3   | 3.7  |
| ULK1                         | ULK1    | 43   |
| ULK2                         | ULK2    | 7.2  |
| ULK3                         | ULK3    | 0.15 |
| VEGFR2                       | KDR     | 0.45 |
| VPS34                        | PIK3C3  | 74   |
| VRK2                         | VRK2    | 82   |
| WEE1                         | WEE1    | 61   |
| WEE2                         | WEE2    | 12   |
| WNK1                         | WNK1    | 20   |
| WNK2                         | WNK2    | 17   |
| WNK3                         | WNK3    | 5.1  |
| WNK4                         | WNK4    | 44   |
| YANK1                        | STK32A  | 100  |
| YANK2                        | STK32B  | 100  |
| YANK3                        | STK32C  | 80   |
| YES                          | YES1    | 0.2  |
| YSK1                         | STK25   | 22   |
| YSK4                         | MAP3K19 | 0.15 |
| ZAK                          | ZAK     | 0.1  |
| ZAP70                        | ZAP70   | 1.8  |

**Compound 12:**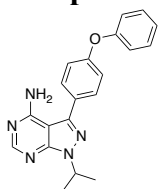

| DiscoverX Gene Symbol         | Entrez Gene Symbol | Percent Control | Compound Concentration (nM) |
|-------------------------------|--------------------|-----------------|-----------------------------|
| AAK1                          | AAK1               | 83              | 500                         |
| ABL1(E255K)-phosphorylated    | ABL1               | 33              | 500                         |
| ABL1(F317I)-nonphosphorylated | ABL1               | 3               | 500                         |
| ABL1(F317I)-phosphorylated    | ABL1               | 41              | 500                         |
| ABL1(F317L)-nonphosphorylated | ABL1               | 7.9             | 500                         |
| ABL1(F317L)-phosphorylated    | ABL1               | 19              | 500                         |
| ABL1(H396P)-nonphosphorylated | ABL1               | 10              | 500                         |
| ABL1(H396P)-phosphorylated    | ABL1               | 39              | 500                         |
| ABL1(M351T)-phosphorylated    | ABL1               | 59              | 500                         |
| ABL1(Q252H)-nonphosphorylated | ABL1               | 5.6             | 500                         |
| ABL1(Q252H)-phosphorylated    | ABL1               | 38              | 500                         |
| ABL1(T315I)-nonphosphorylated | ABL1               | 99              | 500                         |
| ABL1(T315I)-phosphorylated    | ABL1               | 97              | 500                         |
| ABL1(Y253F)-phosphorylated    | ABL1               | 38              | 500                         |
| ABL1-nonphosphorylated        | ABL1               | 1.9             | 500                         |
| ABL1-phosphorylated           | ABL1               | 35              | 500                         |
| ABL2                          | ABL2               | 24              | 500                         |
| ACVR1                         | ACVR1              | 95              | 500                         |
| ACVR1B                        | ACVR1B             | 100             | 500                         |
| ACVR2A                        | ACVR2A             | 100             | 500                         |
| ACVR2B                        | ACVR2B             | 99              | 500                         |
| ACVRL1                        | ACVRL1             | 100             | 500                         |
| ADCK3                         | CABC1              | 95              | 500                         |
| ADCK4                         | ADCK4              | 72              | 500                         |
| AKT1                          | AKT1               | 68              | 500                         |
| AKT2                          | AKT2               | 95              | 500                         |
| AKT3                          | AKT3               | 91              | 500                         |
| ALK                           | ALK                | 86              | 500                         |
| ALK(C1156Y)                   | ALK                | 90              | 500                         |
| ALK(L1196M)                   | ALK                | 96              | 500                         |
| AMPK-alpha1                   | PRKAA1             | 71              | 500                         |
| AMPK-alpha2                   | PRKAA2             | 71              | 500                         |

|             |        |      |     |
|-------------|--------|------|-----|
| ANKK1       | ANKK1  | 76   | 500 |
| ARK5        | NUAK1  | 100  | 500 |
| ASK1        | MAP3K5 | 92   | 500 |
| ASK2        | MAP3K6 | 77   | 500 |
| AURKA       | AURKA  | 81   | 500 |
| AURKB       | AURKB  | 75   | 500 |
| AURKC       | AURKC  | 53   | 500 |
| AXL         | AXL    | 68   | 500 |
| BIKE        | BMP2K  | 78   | 500 |
| BLK         | BLK    | 0.05 | 500 |
| BMPR1A      | BMPR1A | 92   | 500 |
| BMPR1B      | BMPR1B | 100  | 500 |
| BMPR2       | BMPR2  | 97   | 500 |
| BMX         | BMX    | 14   | 500 |
| BRAF        | BRAF   | 88   | 500 |
| BRAF(V600E) | BRAF   | 71   | 500 |
| BRK         | PTK6   | 0.55 | 500 |
| BRSK1       | BRSK1  | 85   | 500 |
| BRSK2       | BRSK2  | 82   | 500 |
| BTK         | BTK    | 0.1  | 500 |
| BUB1        | BUB1   | 99   | 500 |
| CAMK1       | CAMK1  | 70   | 500 |
| CAMK1B      | PNCK   | 83   | 500 |
| CAMK1D      | CAMK1D | 82   | 500 |
| CAMK1G      | CAMK1G | 86   | 500 |
| CAMK2A      | CAMK2A | 95   | 500 |
| CAMK2B      | CAMK2B | 81   | 500 |
| CAMK2D      | CAMK2D | 86   | 500 |
| CAMK2G      | CAMK2G | 85   | 500 |
| CAMK4       | CAMK4  | 70   | 500 |
| CAMKK1      | CAMKK1 | 65   | 500 |
| CAMKK2      | CAMKK2 | 66   | 500 |
| CASK        | CASK   | 85   | 500 |
| CDC2L1      | CDK11B | 68   | 500 |
| CDC2L2      | CDC2L2 | 80   | 500 |
| CDC2L5      | CDK13  | 100  | 500 |
| CDK11       | CDK19  | 73   | 500 |
| CDK2        | CDK2   | 82   | 500 |
| CDK3        | CDK3   | 89   | 500 |
| CDK4        | CDK4   | 70   | 500 |

|                     |          |     |     |
|---------------------|----------|-----|-----|
| CDK4-cyclinD1       | CDK4     | 86  | 500 |
| CDK4-cyclinD3       | CDK4     | 72  | 500 |
| CDK5                | CDK5     | 100 | 500 |
| CDK7                | CDK7     | 73  | 500 |
| CDK8                | CDK8     | 93  | 500 |
| CDK9                | CDK9     | 72  | 500 |
| CDKL1               | CDKL1    | 65  | 500 |
| CDKL2               | CDKL2    | 96  | 500 |
| CDKL3               | CDKL3    | 96  | 500 |
| CDKL5               | CDKL5    | 89  | 500 |
| CHEK1               | CHEK1    | 89  | 500 |
| CHEK2               | CHEK2    | 90  | 500 |
| CIT                 | CIT      | 98  | 500 |
| CLK1                | CLK1     | 78  | 500 |
| CLK2                | CLK2     | 89  | 500 |
| CLK3                | CLK3     | 37  | 500 |
| CLK4                | CLK4     | 97  | 500 |
| CSF1R               | CSF1R    | 61  | 500 |
| CSF1R-autoinhibited | CSF1R    | 99  | 500 |
| CSK                 | CSK      | 2.6 | 500 |
| CSNK1A1             | CSNK1A1  | 57  | 500 |
| CSNK1A1L            | CSNK1A1L | 86  | 500 |
| CSNK1D              | CSNK1D   | 79  | 500 |
| CSNK1E              | CSNK1E   | 8.3 | 500 |
| CSNK1G1             | CSNK1G1  | 81  | 500 |
| CSNK1G2             | CSNK1G2  | 94  | 500 |
| CSNK1G3             | CSNK1G3  | 95  | 500 |
| CSNK2A1             | CSNK2A1  | 78  | 500 |
| CSNK2A2             | CSNK2A2  | 89  | 500 |
| CTK                 | MATK     | 44  | 500 |
| DAPK1               | DAPK1    | 93  | 500 |
| DAPK2               | DAPK2    | 90  | 500 |
| DAPK3               | DAPK3    | 80  | 500 |
| DCAMKL1             | DCLK1    | 68  | 500 |
| DCAMKL2             | DCLK2    | 80  | 500 |
| DCAMKL3             | DCLK3    | 78  | 500 |
| DDR1                | DDR1     | 72  | 500 |
| DDR2                | DDR2     | 82  | 500 |
| DLK                 | MAP3K12  | 79  | 500 |
| DMPK                | DMPK     | 94  | 500 |

|                           |          |     |     |
|---------------------------|----------|-----|-----|
| DMPK2                     | CDC42BPG | 75  | 500 |
| DRAK1                     | STK17A   | 88  | 500 |
| DRAK2                     | STK17B   | 91  | 500 |
| DYRK1A                    | DYRK1A   | 84  | 500 |
| DYRK1B                    | DYRK1B   | 100 | 500 |
| DYRK2                     | DYRK2    | 80  | 500 |
| EGFR                      | EGFR     | 6.2 | 500 |
| EGFR(E746-A750del)        | EGFR     | 81  | 500 |
| EGFR(G719C)               | EGFR     | 12  | 500 |
| EGFR(G719S)               | EGFR     | 8.9 | 500 |
| EGFR(L747-E749del, A750P) | EGFR     | 66  | 500 |
| EGFR(L747-S752del, P753S) | EGFR     | 69  | 500 |
| EGFR(L747-T751del,Sins)   | EGFR     | 51  | 500 |
| EGFR(L858R)               | EGFR     | 66  | 500 |
| EGFR(L858R,T790M)         | EGFR     | 92  | 500 |
| EGFR(L861Q)               | EGFR     | 44  | 500 |
| EGFR(S752-I759del)        | EGFR     | 72  | 500 |
| EGFR(T790M)               | EGFR     | 13  | 500 |
| EIF2AK1                   | EIF2AK1  | 73  | 500 |
| EPHA1                     | EPHA1    | 69  | 500 |
| EPHA2                     | EPHA2    | 83  | 500 |
| EPHA3                     | EPHA3    | 94  | 500 |
| EPHA4                     | EPHA4    | 89  | 500 |
| EPHA5                     | EPHA5    | 93  | 500 |
| EPHA6                     | EPHA6    | 84  | 500 |
| EPHA7                     | EPHA7    | 67  | 500 |
| EPHA8                     | EPHA8    | 72  | 500 |
| EPHB1                     | EPHB1    | 93  | 500 |
| EPHB2                     | EPHB2    | 84  | 500 |
| EPHB3                     | EPHB3    | 96  | 500 |
| EPHB4                     | EPHB4    | 74  | 500 |
| EPHB6                     | EPHB6    | 3   | 500 |
| ERBB2                     | ERBB2    | 0   | 500 |
| ERBB3                     | ERBB3    | 0   | 500 |
| ERBB4                     | ERBB4    | 11  | 500 |
| ERK1                      | MAPK3    | 89  | 500 |
| ERK2                      | MAPK1    | 94  | 500 |
| ERK3                      | MAPK6    | 97  | 500 |
| ERK4                      | MAPK4    | 65  | 500 |
| ERK5                      | MAPK7    | 55  | 500 |

|                       |         |     |     |
|-----------------------|---------|-----|-----|
| ERK8                  | MAPK15  | 79  | 500 |
| ERN1                  | ERN1    | 57  | 500 |
| FAK                   | PTK2    | 76  | 500 |
| FER                   | FER     | 91  | 500 |
| FES                   | FES     | 78  | 500 |
| FGFR1                 | FGFR1   | 57  | 500 |
| FGFR2                 | FGFR2   | 53  | 500 |
| FGFR3                 | FGFR3   | 75  | 500 |
| FGFR3(G697C)          | FGFR3   | 72  | 500 |
| FGFR4                 | FGFR4   | 98  | 500 |
| FGR                   | FGR     | 3.2 | 500 |
| FLT1                  | FLT1    | 53  | 500 |
| FLT3                  | FLT3    | 7   | 500 |
| FLT3(D835H)           | FLT3    | 32  | 500 |
| FLT3(D835V)           | FLT3    | 5.4 | 500 |
| FLT3(D835Y)           | FLT3    | 37  | 500 |
| FLT3(ITD)             | FLT3    | 22  | 500 |
| FLT3(ITD,D835V)       | FLT3    | 61  | 500 |
| FLT3(ITD,F691L)       | FLT3    | 100 | 500 |
| FLT3(K663Q)           | FLT3    | 24  | 500 |
| FLT3(N841I)           | FLT3    | 6.1 | 500 |
| FLT3(R834Q)           | FLT3    | 49  | 500 |
| FLT3-autoinhibited    | FLT3    | 53  | 500 |
| FLT4                  | FLT4    | 69  | 500 |
| FRK                   | FRK     | 2.7 | 500 |
| FYN                   | FYN     | 2.7 | 500 |
| GAK                   | GAK     | 77  | 500 |
| GCN2(Kin.Dom.2,S808G) | EIF2AK4 | 59  | 500 |
| GRK1                  | GRK1    | 86  | 500 |
| GRK2                  | ADRBK1  | 97  | 500 |
| GRK3                  | ADRBK2  | 93  | 500 |
| GRK4                  | GRK4    | 100 | 500 |
| GRK7                  | GRK7    | 63  | 500 |
| GSK3A                 | GSK3A   | 92  | 500 |
| GSK3B                 | GSK3B   | 73  | 500 |
| HASPIN                | GSG2    | 95  | 500 |
| HCK                   | HCK     | 1.8 | 500 |
| HIPK1                 | HIPK1   | 71  | 500 |
| HIPK2                 | HIPK2   | 96  | 500 |
| HIPK3                 | HIPK3   | 98  | 500 |



|                              |        |     |     |
|------------------------------|--------|-----|-----|
| HIPK4                        | HIPK4  | 84  | 500 |
| HPK1                         | MAP4K1 | 100 | 500 |
| HUNK                         | HUNK   | 87  | 500 |
| ICK                          | ICK    | 88  | 500 |
| IGF1R                        | IGF1R  | 96  | 500 |
| IKK-alpha                    | CHUK   | 87  | 500 |
| IKK-beta                     | IKBKB  | 70  | 500 |
| IKK-epsilon                  | IKBKE  | 67  | 500 |
| INSR                         | INSR   | 91  | 500 |
| INSRR                        | INSRR  | 96  | 500 |
| IRAK1                        | IRAK1  | 85  | 500 |
| IRAK3                        | IRAK3  | 80  | 500 |
| IRAK4                        | IRAK4  | 94  | 500 |
| ITK                          | ITK    | 72  | 500 |
| JAK1(JH1domain-catalytic)    | JAK1   | 98  | 500 |
| JAK1(JH2domain-pseudokinase) | JAK1   | 75  | 500 |
| JAK2(JH1domain-catalytic)    | JAK2   | 72  | 500 |
| JAK3(JH1domain-catalytic)    | JAK3   | 100 | 500 |
| JNK1                         | MAPK8  | 79  | 500 |
| JNK2                         | MAPK9  | 89  | 500 |
| JNK3                         | MAPK10 | 91  | 500 |
| KIT                          | KIT    | 9.9 | 500 |
| KIT(A829P)                   | KIT    | 37  | 500 |
| KIT(D816H)                   | KIT    | 77  | 500 |
| KIT(D816V)                   | KIT    | 76  | 500 |
| KIT(L576P)                   | KIT    | 4.5 | 500 |
| KIT(V559D)                   | KIT    | 3.7 | 500 |
| KIT(V559D,T670I)             | KIT    | 91  | 500 |
| KIT(V559D,V654A)             | KIT    | 69  | 500 |
| KIT-autoinhibited            | KIT    | 59  | 500 |
| LATS1                        | LATS1  | 65  | 500 |
| LATS2                        | LATS2  | 46  | 500 |
| LCK                          | LCK    | 1.2 | 500 |
| LIMK1                        | LIMK1  | 29  | 500 |
| LIMK2                        | LIMK2  | 75  | 500 |
| LKB1                         | STK11  | 90  | 500 |
| LOK                          | STK10  | 46  | 500 |
| LRRK2                        | LRRK2  | 100 | 500 |
| LRRK2(G2019S)                | LRRK2  | 69  | 500 |
| LTK                          | LTK    | 58  | 500 |

|             |          |     |     |
|-------------|----------|-----|-----|
| LYN         | LYN      | 6.1 | 500 |
| LZK         | MAP3K13  | 90  | 500 |
| MAK         | MAK      | 100 | 500 |
| MAP3K1      | MAP3K1   | 67  | 500 |
| MAP3K15     | MAP3K15  | 69  | 500 |
| MAP3K2      | MAP3K2   | 12  | 500 |
| MAP3K3      | MAP3K3   | 30  | 500 |
| MAP3K4      | MAP3K4   | 81  | 500 |
| MAP4K2      | MAP4K2   | 95  | 500 |
| MAP4K3      | MAP4K3   | 89  | 500 |
| MAP4K4      | MAP4K4   | 100 | 500 |
| MAP4K5      | MAP4K5   | 88  | 500 |
| MAPKAPK2    | MAPKAPK2 | 100 | 500 |
| MAPKAPK5    | MAPKAPK5 | 99  | 500 |
| MARK1       | MARK1    | 91  | 500 |
| MARK2       | MARK2    | 94  | 500 |
| MARK3       | MARK3    | 88  | 500 |
| MARK4       | MARK4    | 100 | 500 |
| MAST1       | MAST1    | 92  | 500 |
| MEK1        | MAP2K1   | 1   | 500 |
| MEK2        | MAP2K2   | 1.6 | 500 |
| MEK3        | MAP2K3   | 83  | 500 |
| MEK4        | MAP2K4   | 88  | 500 |
| MEK5        | MAP2K5   | 0   | 500 |
| MEK6        | MAP2K6   | 91  | 500 |
| MELK        | MELK     | 75  | 500 |
| MERTK       | MERTK    | 66  | 500 |
| MET         | MET      | 70  | 500 |
| MET(M1250T) | MET      | 100 | 500 |
| MET(Y1235D) | MET      | 83  | 500 |
| MINK        | MINK1    | 77  | 500 |
| MKK7        | MAP2K7   | 95  | 500 |
| MKNK1       | MKNK1    | 87  | 500 |
| MKNK2       | MKNK2    | 67  | 500 |
| MLCK        | MYLK3    | 79  | 500 |
| MLK1        | MAP3K9   | 90  | 500 |
| MLK2        | MAP3K10  | 90  | 500 |
| MLK3        | MAP3K11  | 78  | 500 |
| MRCKA       | CDC42BPA | 73  | 500 |
| MRCKB       | CDC42BPB | 91  | 500 |

|           |          |     |     |
|-----------|----------|-----|-----|
| MST1      | STK4     | 72  | 500 |
| MST1R     | MST1R    | 94  | 500 |
| MST2      | STK3     | 79  | 500 |
| MST3      | STK24    | 97  | 500 |
| MST4      | MST4     | 100 | 500 |
| MTOR      | MTOR     | 51  | 500 |
| MUSK      | MUSK     | 100 | 500 |
| MYLK      | MYLK     | 53  | 500 |
| MYLK2     | MYLK2    | 92  | 500 |
| MYLK4     | MYLK4    | 85  | 500 |
| MYO3A     | MYO3A    | 74  | 500 |
| MYO3B     | MYO3B    | 63  | 500 |
| NDR1      | STK38    | 74  | 500 |
| NDR2      | STK38L   | 77  | 500 |
| NEK1      | NEK1     | 95  | 500 |
| NEK10     | NEK10    | 100 | 500 |
| NEK11     | NEK11    | 97  | 500 |
| NEK2      | NEK2     | 100 | 500 |
| NEK3      | NEK3     | 73  | 500 |
| NEK4      | NEK4     | 98  | 500 |
| NEK5      | NEK5     | 82  | 500 |
| NEK6      | NEK6     | 76  | 500 |
| NEK7      | NEK7     | 82  | 500 |
| NEK9      | NEK9     | 42  | 500 |
| NIK       | MAP3K14  | 96  | 500 |
| NIM1      | MGC42105 | 90  | 500 |
| NLK       | NLK      | 77  | 500 |
| OSR1      | OXS1     | 94  | 500 |
| p38-alpha | MAPK14   | 91  | 500 |
| p38-beta  | MAPK11   | 91  | 500 |
| p38-delta | MAPK13   | 100 | 500 |
| p38-gamma | MAPK12   | 62  | 500 |
| PAK1      | PAK1     | 82  | 500 |
| PAK2      | PAK2     | 75  | 500 |
| PAK3      | PAK3     | 73  | 500 |
| PAK4      | PAK4     | 83  | 500 |
| PAK6      | PAK6     | 79  | 500 |
| PAK7      | PAK7     | 100 | 500 |
| PCTK1     | CDK16    | 100 | 500 |
| PCTK2     | CDK17    | 57  | 500 |

|                       |             |     |     |
|-----------------------|-------------|-----|-----|
| PCTK3                 | CDK18       | 54  | 500 |
| PDGFRA                | PDGFRA      | 20  | 500 |
| PDGFRB                | PDGFRB      | 7.5 | 500 |
| PDPK1                 | PDPK1       | 79  | 500 |
| PFCDPK1(P.falciparum) | CDPK1       | 0   | 500 |
| PFPK5(P.falciparum)   | MAL13P1.279 | 95  | 500 |
| PFTAIRE2              | CDK15       | 98  | 500 |
| PFTK1                 | CDK14       | 71  | 500 |
| PHKG1                 | PHKG1       | 84  | 500 |
| PHKG2                 | PHKG2       | 79  | 500 |
| PIK3C2B               | PIK3C2B     | 99  | 500 |
| PIK3C2G               | PIK3C2G     | 87  | 500 |
| PIK3CA                | PIK3CA      | 100 | 500 |
| PIK3CA(C420R)         | PIK3CA      | 91  | 500 |
| PIK3CA(E542K)         | PIK3CA      | 100 | 500 |
| PIK3CA(E545A)         | PIK3CA      | 85  | 500 |
| PIK3CA(E545K)         | PIK3CA      | 84  | 500 |
| PIK3CA(H1047L)        | PIK3CA      | 96  | 500 |
| PIK3CA(H1047Y)        | PIK3CA      | 63  | 500 |
| PIK3CA(I800L)         | PIK3CA      | 59  | 500 |
| PIK3CA(M1043I)        | PIK3CA      | 79  | 500 |
| PIK3CA(Q546K)         | PIK3CA      | 95  | 500 |
| PIK3CB                | PIK3CB      | 90  | 500 |
| PIK3CD                | PIK3CD      | 83  | 500 |
| PIK3CG                | PIK3CG      | 95  | 500 |
| PIK4CB                | PI4KB       | 100 | 500 |
| PIKFYVE               | PIKFYVE     | 89  | 500 |
| PIM1                  | PIM1        | 74  | 500 |
| PIM2                  | PIM2        | 81  | 500 |
| PIM3                  | PIM3        | 75  | 500 |
| PIP5K1A               | PIP5K1A     | 74  | 500 |
| PIP5K1C               | PIP5K1C     | 93  | 500 |
| PIP5K2B               | PIP4K2B     | 100 | 500 |
| PIP5K2C               | PIP4K2C     | 5.8 | 500 |
| PKAC-alpha            | PRKACA      | 77  | 500 |
| PKAC-beta             | PRKACB      | 88  | 500 |
| PKMYT1                | PKMYT1      | 98  | 500 |
| PKN1                  | PKN1        | 77  | 500 |
| PKN2                  | PKN2        | 100 | 500 |
| PKNB(M.tuberculosis)  | pknB        | 58  | 500 |

|                               |          |     |     |
|-------------------------------|----------|-----|-----|
| PLK1                          | PLK1     | 92  | 500 |
| PLK2                          | PLK2     | 91  | 500 |
| PLK3                          | PLK3     | 87  | 500 |
| PLK4                          | PLK4     | 83  | 500 |
| PRKCD                         | PRKCD    | 89  | 500 |
| PRKCE                         | PRKCE    | 83  | 500 |
| PRKCH                         | PRKCH    | 97  | 500 |
| PRKCI                         | PRKCI    | 53  | 500 |
| PRKCQ                         | PRKCQ    | 88  | 500 |
| PRKD1                         | PRKD1    | 40  | 500 |
| PRKD2                         | PRKD2    | 75  | 500 |
| PRKD3                         | PRKD3    | 76  | 500 |
| PRKG1                         | PRKG1    | 84  | 500 |
| PRKG2                         | PRKG2    | 76  | 500 |
| PRKR                          | EIF2AK2  | 94  | 500 |
| PRKX                          | PRKX     | 100 | 500 |
| PRP4                          | PRPF4B   | 96  | 500 |
| PYK2                          | PTK2B    | 94  | 500 |
| QSK                           | KIAA0999 | 100 | 500 |
| RAF1                          | RAF1     | 85  | 500 |
| RET                           | RET      | 1   | 500 |
| RET(M918T)                    | RET      | 3.6 | 500 |
| RET(V804L)                    | RET      | 70  | 500 |
| RET(V804M)                    | RET      | 63  | 500 |
| RIOK1                         | RIOK1    | 64  | 500 |
| RIOK2                         | RIOK2    | 93  | 500 |
| RIOK3                         | RIOK3    | 91  | 500 |
| RIPK1                         | RIPK1    | 89  | 500 |
| RIPK2                         | RIPK2    | 2.6 | 500 |
| RIPK4                         | RIPK4    | 91  | 500 |
| RIPK5                         | DSTYK    | 48  | 500 |
| ROCK1                         | ROCK1    | 90  | 500 |
| ROCK2                         | ROCK2    | 68  | 500 |
| ROS1                          | ROS1     | 74  | 500 |
| RPS6KA4(Kin.Dom.1-N-terminal) | RPS6KA4  | 81  | 500 |
| RPS6KA4(Kin.Dom.2-C-terminal) | RPS6KA4  | 98  | 500 |
| RPS6KA5(Kin.Dom.1-N-terminal) | RPS6KA5  | 84  | 500 |
| RPS6KA5(Kin.Dom.2-C-terminal) | RPS6KA5  | 74  | 500 |
| RSK1(Kin.Dom.1-N-terminal)    | RPS6KA1  | 83  | 500 |
| RSK1(Kin.Dom.2-C-terminal)    | RPS6KA1  | 96  | 500 |

|                            |         |     |     |
|----------------------------|---------|-----|-----|
| RSK2(Kin.Dom.1-N-terminal) | RPS6KA3 | 77  | 500 |
| RSK2(Kin.Dom.2-C-terminal) | RPS6KA3 | 94  | 500 |
| RSK3(Kin.Dom.1-N-terminal) | RPS6KA2 | 90  | 500 |
| RSK3(Kin.Dom.2-C-terminal) | RPS6KA2 | 62  | 500 |
| RSK4(Kin.Dom.1-N-terminal) | RPS6KA6 | 100 | 500 |
| RSK4(Kin.Dom.2-C-terminal) | RPS6KA6 | 93  | 500 |
| S6K1                       | RPS6KB1 | 89  | 500 |
| SBK1                       | SBK1    | 98  | 500 |
| SGK                        | SGK1    | 94  | 500 |
| SgK110                     | SgK110  | 64  | 500 |
| SGK2                       | SGK2    | 83  | 500 |
| SGK3                       | SGK3    | 100 | 500 |
| SIK                        | SIK1    | 59  | 500 |
| SIK2                       | SIK2    | 91  | 500 |
| SLK                        | SLK     | 72  | 500 |
| SNARK                      | NUAK2   | 68  | 500 |
| SNRK                       | SNRK    | 73  | 500 |
| SRC                        | SRC     | 0.2 | 500 |
| SRMS                       | SRMS    | 0   | 500 |
| SRPK1                      | SRPK1   | 55  | 500 |
| SRPK2                      | SRPK2   | 100 | 500 |
| SRPK3                      | SRPK3   | 100 | 500 |
| STK16                      | STK16   | 93  | 500 |
| STK33                      | STK33   | 80  | 500 |
| STK35                      | STK35   | 23  | 500 |
| STK36                      | STK36   | 71  | 500 |
| STK39                      | STK39   | 93  | 500 |
| SYK                        | SYK     | 99  | 500 |
| TAK1                       | MAP3K7  | 60  | 500 |
| TAOK1                      | TAOK1   | 100 | 500 |
| TAOK2                      | TAOK2   | 69  | 500 |
| TAOK3                      | TAOK3   | 100 | 500 |
| TBK1                       | TBK1    | 60  | 500 |
| TEC                        | TEC     | 9.6 | 500 |
| TESK1                      | TESK1   | 95  | 500 |
| TGFBR1                     | TGFBR1  | 87  | 500 |
| TGFBR2                     | TGFBR2  | 74  | 500 |
| TIE1                       | TIE1    | 74  | 500 |
| TIE2                       | TEK     | 78  | 500 |
| TLK1                       | TLK1    | 100 | 500 |

|                              |         |     |     |
|------------------------------|---------|-----|-----|
| TLK2                         | TLK2    | 82  | 500 |
| TNIK                         | TNIK    | 99  | 500 |
| TNK1                         | TNK1    | 1.6 | 500 |
| TNK2                         | TNK2    | 9.8 | 500 |
| TNNI3K                       | TNNI3K  | 46  | 500 |
| TRKA                         | NTRK1   | 41  | 500 |
| TRKB                         | NTRK2   | 100 | 500 |
| TRKC                         | NTRK3   | 91  | 500 |
| TRPM6                        | TRPM6   | 80  | 500 |
| TSSK1B                       | TSSK1B  | 90  | 500 |
| TSSK3                        | TSSK3   | 89  | 500 |
| TTK                          | TTK     | 44  | 500 |
| TXK                          | TXK     | 18  | 500 |
| TYK2(JH1domain-catalytic)    | TYK2    | 94  | 500 |
| TYK2(JH2domain-pseudokinase) | TYK2    | 90  | 500 |
| TYRO3                        | TYRO3   | 31  | 500 |
| ULK1                         | ULK1    | 80  | 500 |
| ULK2                         | ULK2    | 85  | 500 |
| ULK3                         | ULK3    | 80  | 500 |
| VEGFR2                       | KDR     | 75  | 500 |
| VPS34                        | PIK3C3  | 100 | 500 |
| VRK2                         | VRK2    | 88  | 500 |
| WEE1                         | WEE1    | 92  | 500 |
| WEE2                         | WEE2    | 81  | 500 |
| WNK1                         | WNK1    | 77  | 500 |
| WNK2                         | WNK2    | 100 | 500 |
| WNK3                         | WNK3    | 86  | 500 |
| WNK4                         | WNK4    | 85  | 500 |
| YANK1                        | STK32A  | 57  | 500 |
| YANK2                        | STK32B  | 74  | 500 |
| YANK3                        | STK32C  | 72  | 500 |
| YES                          | YES1    | 1.3 | 500 |
| YSK1                         | STK25   | 100 | 500 |
| YSK4                         | MAP3K19 | 90  | 500 |
| ZAK                          | ZAK     | 39  | 500 |
| ZAP70                        | ZAP70   | 97  | 500 |

**Compound 10:**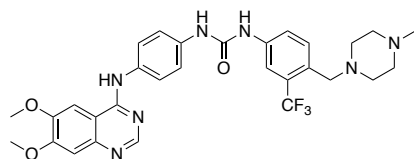

| DiscoverX Gene Symbol         | Entrez Gene Symbol | Percent Control | Compound Concentration (nM) |
|-------------------------------|--------------------|-----------------|-----------------------------|
| AAK1                          | AAK1               | 83              | 500                         |
| ABL1(E255K)-phosphorylated    | ABL1               | 33              | 500                         |
| ABL1(F317I)-nonphosphorylated | ABL1               | 15              | 500                         |
| ABL1(F317I)-phosphorylated    | ABL1               | 42              | 500                         |
| ABL1(F317L)-nonphosphorylated | ABL1               | 56              | 500                         |
| ABL1(F317L)-phosphorylated    | ABL1               | 15              | 500                         |
| ABL1(H396P)-nonphosphorylated | ABL1               | 7.9             | 500                         |
| ABL1(H396P)-phosphorylated    | ABL1               | 43              | 500                         |
| ABL1(M351T)-phosphorylated    | ABL1               | 29              | 500                         |
| ABL1(Q252H)-nonphosphorylated | ABL1               | 6.9             | 500                         |
| ABL1(Q252H)-phosphorylated    | ABL1               | 40              | 500                         |
| ABL1(T315I)-nonphosphorylated | ABL1               | 3.9             | 500                         |
| ABL1(T315I)-phosphorylated    | ABL1               | 2               | 500                         |
| ABL1(Y253F)-phosphorylated    | ABL1               | 16              | 500                         |
| ABL1-nonphosphorylated        | ABL1               | 0.95            | 500                         |
| ABL1-phosphorylated           | ABL1               | 27              | 500                         |
| ABL2                          | ABL2               | 30              | 500                         |
| ACVR1                         | ACVR1              | 100             | 500                         |
| ACVR1B                        | ACVR1B             | 98              | 500                         |
| ACVR2A                        | ACVR2A             | 100             | 500                         |
| ACVR2B                        | ACVR2B             | 100             | 500                         |
| ACVRL1                        | ACVRL1             | 86              | 500                         |
| ADCK3                         | CABC1              | 81              | 500                         |
| ADCK4                         | ADCK4              | 100             | 500                         |
| AKT1                          | AKT1               | 100             | 500                         |
| AKT2                          | AKT2               | 77              | 500                         |
| AKT3                          | AKT3               | 88              | 500                         |
| ALK                           | ALK                | 72              | 500                         |
| ALK(C1156Y)                   | ALK                | 100             | 500                         |
| ALK(L1196M)                   | ALK                | 100             | 500                         |
| AMPK-alpha1                   | PRKAA1             | 97              | 500                         |
| AMPK-alpha2                   | PRKAA2             | 97              | 500                         |



|             |        |     |     |
|-------------|--------|-----|-----|
| ANKK1       | ANKK1  | 8.3 | 500 |
| ARK5        | NUAK1  | 80  | 500 |
| ASK1        | MAP3K5 | 100 | 500 |
| ASK2        | MAP3K6 | 80  | 500 |
| AURKA       | AURKA  | 100 | 500 |
| AURKB       | AURKB  | 84  | 500 |
| AURKC       | AURKC  | 74  | 500 |
| AXL         | AXL    | 17  | 500 |
| BIKE        | BMP2K  | 100 | 500 |
| BLK         | BLK    | 0.5 | 500 |
| BMPR1A      | BMPR1A | 90  | 500 |
| BMPR1B      | BMPR1B | 100 | 500 |
| BMPR2       | BMPR2  | 100 | 500 |
| BMX         | BMX    | 94  | 500 |
| BRAF        | BRAF   | 91  | 500 |
| BRAF(V600E) | BRAF   | 67  | 500 |
| BRK         | PTK6   | 100 | 500 |
| BRSK1       | BRSK1  | 100 | 500 |
| BRSK2       | BRSK2  | 94  | 500 |
| BTK         | BTK    | 86  | 500 |
| BUB1        | BUB1   | 100 | 500 |
| CAMK1       | CAMK1  | 77  | 500 |
| CAMK1B      | PNCK   | 82  | 500 |
| CAMK1D      | CAMK1D | 88  | 500 |
| CAMK1G      | CAMK1G | 86  | 500 |
| CAMK2A      | CAMK2A | 100 | 500 |
| CAMK2B      | CAMK2B | 100 | 500 |
| CAMK2D      | CAMK2D | 89  | 500 |
| CAMK2G      | CAMK2G | 86  | 500 |
| CAMK4       | CAMK4  | 99  | 500 |
| CAMKK1      | CAMKK1 | 33  | 500 |
| CAMKK2      | CAMKK2 | 28  | 500 |
| CASK        | CASK   | 95  | 500 |
| CDC2L1      | CDK11B | 94  | 500 |
| CDC2L2      | CDC2L2 | 94  | 500 |
| CDC2L5      | CDK13  | 27  | 500 |
| CDK11       | CDK19  | 8.3 | 500 |
| CDK2        | CDK2   | 98  | 500 |
| CDK3        | CDK3   | 99  | 500 |
| CDK4        | CDK4   | 100 | 500 |

|                     |          |     |     |
|---------------------|----------|-----|-----|
| CDK4-cyclinD1       | CDK4     | 100 | 500 |
| CDK4-cyclinD3       | CDK4     | 99  | 500 |
| CDK5                | CDK5     | 100 | 500 |
| CDK7                | CDK7     | 11  | 500 |
| CDK8                | CDK8     | 29  | 500 |
| CDK9                | CDK9     | 97  | 500 |
| CDKL1               | CDKL1    | 56  | 500 |
| CDKL2               | CDKL2    | 0   | 500 |
| CDKL3               | CDKL3    | 13  | 500 |
| CDKL5               | CDKL5    | 100 | 500 |
| CHEK1               | CHEK1    | 100 | 500 |
| CHEK2               | CHEK2    | 15  | 500 |
| CIT                 | CIT      | 88  | 500 |
| CLK1                | CLK1     | 26  | 500 |
| CLK2                | CLK2     | 89  | 500 |
| CLK3                | CLK3     | 88  | 500 |
| CLK4                | CLK4     | 16  | 500 |
| CSF1R               | CSF1R    | 0.3 | 500 |
| CSF1R-autoinhibited | CSF1R    | 100 | 500 |
| CSK                 | CSK      | 51  | 500 |
| CSNK1A1             | CSNK1A1  | 74  | 500 |
| CSNK1A1L            | CSNK1A1L | 99  | 500 |
| CSNK1D              | CSNK1D   | 100 | 500 |
| CSNK1E              | CSNK1E   | 75  | 500 |
| CSNK1G1             | CSNK1G1  | 98  | 500 |
| CSNK1G2             | CSNK1G2  | 100 | 500 |
| CSNK1G3             | CSNK1G3  | 91  | 500 |
| CSNK2A1             | CSNK2A1  | 97  | 500 |
| CSNK2A2             | CSNK2A2  | 100 | 500 |
| CTK                 | MATK     | 58  | 500 |
| DAPK1               | DAPK1    | 96  | 500 |
| DAPK2               | DAPK2    | 100 | 500 |
| DAPK3               | DAPK3    | 89  | 500 |
| DCAMKL1             | DCLK1    | 69  | 500 |
| DCAMKL2             | DCLK2    | 94  | 500 |
| DCAMKL3             | DCLK3    | 94  | 500 |
| DDR1                | DDR1     | 0   | 500 |
| DDR2                | DDR2     | 0   | 500 |
| DLK                 | MAP3K12  | 44  | 500 |
| DMPK                | DMPK     | 100 | 500 |

|                           |          |     |     |
|---------------------------|----------|-----|-----|
| DMPK2                     | CDC42BPG | 100 | 500 |
| DRAK1                     | STK17A   | 100 | 500 |
| DRAK2                     | STK17B   | 100 | 500 |
| DYRK1A                    | DYRK1A   | 95  | 500 |
| DYRK1B                    | DYRK1B   | 98  | 500 |
| DYRK2                     | DYRK2    | 83  | 500 |
| EGFR                      | EGFR     | 48  | 500 |
| EGFR(E746-A750del)        | EGFR     | 84  | 500 |
| EGFR(G719C)               | EGFR     | 42  | 500 |
| EGFR(G719S)               | EGFR     | 33  | 500 |
| EGFR(L747-E749del, A750P) | EGFR     | 30  | 500 |
| EGFR(L747-S752del, P753S) | EGFR     | 66  | 500 |
| EGFR(L747-T751del,Sins)   | EGFR     | 62  | 500 |
| EGFR(L858R)               | EGFR     | 21  | 500 |
| EGFR(L858R,T790M)         | EGFR     | 37  | 500 |
| EGFR(L861Q)               | EGFR     | 19  | 500 |
| EGFR(S752-I759del)        | EGFR     | 60  | 500 |
| EGFR(T790M)               | EGFR     | 56  | 500 |
| EIF2AK1                   | EIF2AK1  | 100 | 500 |
| EPHA1                     | EPHA1    | 99  | 500 |
| EPHA2                     | EPHA2    | 62  | 500 |
| EPHA3                     | EPHA3    | 51  | 500 |
| EPHA4                     | EPHA4    | 84  | 500 |
| EPHA5                     | EPHA5    | 97  | 500 |
| EPHA6                     | EPHA6    | 56  | 500 |
| EPHA7                     | EPHA7    | 69  | 500 |
| EPHA8                     | EPHA8    | 6.5 | 500 |
| EPHB1                     | EPHB1    | 100 | 500 |
| EPHB2                     | EPHB2    | 45  | 500 |
| EPHB3                     | EPHB3    | 94  | 500 |
| EPHB4                     | EPHB4    | 100 | 500 |
| EPHB6                     | EPHB6    | 56  | 500 |
| ERBB2                     | ERBB2    | 79  | 500 |
| ERBB3                     | ERBB3    | 100 | 500 |
| ERBB4                     | ERBB4    | 77  | 500 |
| ERK1                      | MAPK3    | 100 | 500 |
| ERK2                      | MAPK1    | 100 | 500 |
| ERK3                      | MAPK6    | 93  | 500 |
| ERK4                      | MAPK4    | 88  | 500 |
| ERK5                      | MAPK7    | 86  | 500 |

|                       |         |     |     |
|-----------------------|---------|-----|-----|
| ERK8                  | MAPK15  | 63  | 500 |
| ERN1                  | ERN1    | 69  | 500 |
| FAK                   | PTK2    | 100 | 500 |
| FER                   | FER     | 61  | 500 |
| FES                   | FES     | 100 | 500 |
| FGFR1                 | FGFR1   | 78  | 500 |
| FGFR2                 | FGFR2   | 80  | 500 |
| FGFR3                 | FGFR3   | 91  | 500 |
| FGFR3(G697C)          | FGFR3   | 92  | 500 |
| FGFR4                 | FGFR4   | 86  | 500 |
| FGR                   | FGR     | 32  | 500 |
| FLT1                  | FLT1    | 13  | 500 |
| FLT3                  | FLT3    | 1.2 | 500 |
| FLT3(D835H)           | FLT3    | 1.3 | 500 |
| FLT3(D835V)           | FLT3    | 0.1 | 500 |
| FLT3(D835Y)           | FLT3    | 35  | 500 |
| FLT3(ITD)             | FLT3    | 3.5 | 500 |
| FLT3(ITD,D835V)       | FLT3    | 43  | 500 |
| FLT3(ITD,F691L)       | FLT3    | 4.7 | 500 |
| FLT3(K663Q)           | FLT3    | 1.8 | 500 |
| FLT3(N841I)           | FLT3    | 0.8 | 500 |
| FLT3(R834Q)           | FLT3    | 3.3 | 500 |
| FLT3-autoinhibited    | FLT3    | 66  | 500 |
| FLT4                  | FLT4    | 1.8 | 500 |
| FRK                   | FRK     | 11  | 500 |
| FYN                   | FYN     | 38  | 500 |
| GAK                   | GAK     | 99  | 500 |
| GCN2(Kin.Dom.2,S808G) | EIF2AK4 | 100 | 500 |
| GRK1                  | GRK1    | 83  | 500 |
| GRK2                  | ADRBK1  | 100 | 500 |
| GRK3                  | ADRBK2  | 95  | 500 |
| GRK4                  | GRK4    | 100 | 500 |
| GRK7                  | GRK7    | 97  | 500 |
| GSK3A                 | GSK3A   | 100 | 500 |
| GSK3B                 | GSK3B   | 99  | 500 |
| HASPIN                | GSG2    | 100 | 500 |
| HCK                   | HCK     | 14  | 500 |
| HIPK1                 | HIPK1   | 33  | 500 |
| HIPK2                 | HIPK2   | 47  | 500 |
| HIPK3                 | HIPK3   | 46  | 500 |

|                              |        |     |     |
|------------------------------|--------|-----|-----|
| HIPK4                        | HIPK4  | 2.5 | 500 |
| HPK1                         | MAP4K1 | 42  | 500 |
| HUNK                         | HUNK   | 99  | 500 |
| ICK                          | ICK    | 89  | 500 |
| IGF1R                        | IGF1R  | 97  | 500 |
| IKK-alpha                    | CHUK   | 84  | 500 |
| IKK-beta                     | IKBKB  | 80  | 500 |
| IKK-epsilon                  | IKBKE  | 99  | 500 |
| INSR                         | INSR   | 97  | 500 |
| INSRR                        | INSRR  | 100 | 500 |
| IRAK1                        | IRAK1  | 100 | 500 |
| IRAK3                        | IRAK3  | 100 | 500 |
| IRAK4                        | IRAK4  | 90  | 500 |
| ITK                          | ITK    | 81  | 500 |
| JAK1(JH1domain-catalytic)    | JAK1   | 55  | 500 |
| JAK1(JH2domain-pseudokinase) | JAK1   | 98  | 500 |
| JAK2(JH1domain-catalytic)    | JAK2   | 64  | 500 |
| JAK3(JH1domain-catalytic)    | JAK3   | 48  | 500 |
| JNK1                         | MAPK8  | 52  | 500 |
| JNK2                         | MAPK9  | 40  | 500 |
| JNK3                         | MAPK10 | 89  | 500 |
| KIT                          | KIT    | 3   | 500 |
| KIT(A829P)                   | KIT    | 6.7 | 500 |
| KIT(D816H)                   | KIT    | 7   | 500 |
| KIT(D816V)                   | KIT    | 16  | 500 |
| KIT(L576P)                   | KIT    | 0.5 | 500 |
| KIT(V559D)                   | KIT    | 0.6 | 500 |
| KIT(V559D,T670I)             | KIT    | 2.7 | 500 |
| KIT(V559D,V654A)             | KIT    | 4   | 500 |
| KIT-autoinhibited            | KIT    | 92  | 500 |
| LATS1                        | LATS1  | 100 | 500 |
| LATS2                        | LATS2  | 100 | 500 |
| LCK                          | LCK    | 2.9 | 500 |
| LIMK1                        | LIMK1  | 93  | 500 |
| LIMK2                        | LIMK2  | 96  | 500 |
| LKB1                         | STK11  | 100 | 500 |
| LOK                          | STK10  | 0   | 500 |
| LRRK2                        | LRRK2  | 100 | 500 |
| LRRK2(G2019S)                | LRRK2  | 100 | 500 |
| LTK                          | LTK    | 43  | 500 |

|             |          |     |     |
|-------------|----------|-----|-----|
| LYN         | LYN      | 6.4 | 500 |
| LZK         | MAP3K13  | 98  | 500 |
| MAK         | MAK      | 89  | 500 |
| MAP3K1      | MAP3K1   | 74  | 500 |
| MAP3K15     | MAP3K15  | 82  | 500 |
| MAP3K2      | MAP3K2   | 83  | 500 |
| MAP3K3      | MAP3K3   | 98  | 500 |
| MAP3K4      | MAP3K4   | 82  | 500 |
| MAP4K2      | MAP4K2   | 73  | 500 |
| MAP4K3      | MAP4K3   | 73  | 500 |
| MAP4K4      | MAP4K4   | 93  | 500 |
| MAP4K5      | MAP4K5   | 35  | 500 |
| MAPKAPK2    | MAPKAPK2 | 100 | 500 |
| MAPKAPK5    | MAPKAPK5 | 99  | 500 |
| MARK1       | MARK1    | 84  | 500 |
| MARK2       | MARK2    | 100 | 500 |
| MARK3       | MARK3    | 95  | 500 |
| MARK4       | MARK4    | 80  | 500 |
| MAST1       | MAST1    | 100 | 500 |
| MEK1        | MAP2K1   | 95  | 500 |
| MEK2        | MAP2K2   | 87  | 500 |
| MEK3        | MAP2K3   | 97  | 500 |
| MEK4        | MAP2K4   | 75  | 500 |
| MEK5        | MAP2K5   | 7.5 | 500 |
| MEK6        | MAP2K6   | 98  | 500 |
| MELK        | MELK     | 87  | 500 |
| MERTK       | MERTK    | 15  | 500 |
| MET         | MET      | 100 | 500 |
| MET(M1250T) | MET      | 87  | 500 |
| MET(Y1235D) | MET      | 99  | 500 |
| MINK        | MINK1    | 60  | 500 |
| MKK7        | MAP2K7   | 100 | 500 |
| MKNK1       | MKNK1    | 22  | 500 |
| MKNK2       | MKNK2    | 1.1 | 500 |
| MLCK        | MYLK3    | 99  | 500 |
| MLK1        | MAP3K9   | 100 | 500 |
| MLK2        | MAP3K10  | 86  | 500 |
| MLK3        | MAP3K11  | 86  | 500 |
| MRCKA       | CDC42BPA | 100 | 500 |
| MRCKB       | CDC42BPB | 100 | 500 |

|           |          |     |     |
|-----------|----------|-----|-----|
| MST1      | STK4     | 79  | 500 |
| MST1R     | MST1R    | 92  | 500 |
| MST2      | STK3     | 94  | 500 |
| MST3      | STK24    | 92  | 500 |
| MST4      | MST4     | 88  | 500 |
| MTOR      | MTOR     | 100 | 500 |
| MUSK      | MUSK     | 13  | 500 |
| MYLK      | MYLK     | 80  | 500 |
| MYLK2     | MYLK2    | 86  | 500 |
| MYLK4     | MYLK4    | 71  | 500 |
| MYO3A     | MYO3A    | 66  | 500 |
| MYO3B     | MYO3B    | 80  | 500 |
| NDR1      | STK38    | 74  | 500 |
| NDR2      | STK38L   | 97  | 500 |
| NEK1      | NEK1     | 79  | 500 |
| NEK10     | NEK10    | 100 | 500 |
| NEK11     | NEK11    | 100 | 500 |
| NEK2      | NEK2     | 95  | 500 |
| NEK3      | NEK3     | 83  | 500 |
| NEK4      | NEK4     | 57  | 500 |
| NEK5      | NEK5     | 100 | 500 |
| NEK6      | NEK6     | 100 | 500 |
| NEK7      | NEK7     | 99  | 500 |
| NEK9      | NEK9     | 95  | 500 |
| NIK       | MAP3K14  | 71  | 500 |
| NIM1      | MGC42105 | 100 | 500 |
| NLK       | NLK      | 87  | 500 |
| OSR1      | OXR1     | 98  | 500 |
| p38-alpha | MAPK14   | 80  | 500 |
| p38-beta  | MAPK11   | 92  | 500 |
| p38-delta | MAPK13   | 99  | 500 |
| p38-gamma | MAPK12   | 29  | 500 |
| PAK1      | PAK1     | 97  | 500 |
| PAK2      | PAK2     | 99  | 500 |
| PAK3      | PAK3     | 100 | 500 |
| PAK4      | PAK4     | 89  | 500 |
| PAK6      | PAK6     | 89  | 500 |
| PAK7      | PAK7     | 100 | 500 |
| PCK1      | CDK16    | 96  | 500 |
| PCK2      | CDK17    | 100 | 500 |

|                       |             |     |     |
|-----------------------|-------------|-----|-----|
| PCTK3                 | CDK18       | 65  | 500 |
| PDGFRA                | PDGFRA      | 1.2 | 500 |
| PDGFRB                | PDGFRB      | 0   | 500 |
| PDPK1                 | PDPK1       | 97  | 500 |
| PFCDPK1(P.falciparum) | CDPK1       | 45  | 500 |
| PFPK5(P.falciparum)   | MAL13P1.279 | 100 | 500 |
| PFTAIRE2              | CDK15       | 83  | 500 |
| PFTK1                 | CDK14       | 58  | 500 |
| PHKG1                 | PHKG1       | 98  | 500 |
| PHKG2                 | PHKG2       | 96  | 500 |
| PIK3C2B               | PIK3C2B     | 100 | 500 |
| PIK3C2G               | PIK3C2G     | 89  | 500 |
| PIK3CA                | PIK3CA      | 100 | 500 |
| PIK3CA(C420R)         | PIK3CA      | 81  | 500 |
| PIK3CA(E542K)         | PIK3CA      | 96  | 500 |
| PIK3CA(E545A)         | PIK3CA      | 83  | 500 |
| PIK3CA(E545K)         | PIK3CA      | 67  | 500 |
| PIK3CA(H1047L)        | PIK3CA      | 100 | 500 |
| PIK3CA(H1047Y)        | PIK3CA      | 90  | 500 |
| PIK3CA(I800L)         | PIK3CA      | 54  | 500 |
| PIK3CA(M1043I)        | PIK3CA      | 98  | 500 |
| PIK3CA(Q546K)         | PIK3CA      | 95  | 500 |
| PIK3CB                | PIK3CB      | 100 | 500 |
| PIK3CD                | PIK3CD      | 91  | 500 |
| PIK3CG                | PIK3CG      | 100 | 500 |
| PIK4CB                | PI4KB       | 89  | 500 |
| PIKFYVE               | PIKFYVE     | 98  | 500 |
| PIM1                  | PIM1        | 85  | 500 |
| PIM2                  | PIM2        | 100 | 500 |
| PIM3                  | PIM3        | 98  | 500 |
| PIP5K1A               | PIP5K1A     | 100 | 500 |
| PIP5K1C               | PIP5K1C     | 98  | 500 |
| PIP5K2B               | PIP4K2B     | 97  | 500 |
| PIP5K2C               | PIP4K2C     | 98  | 500 |
| PKAC-alpha            | PRKACA      | 100 | 500 |
| PKAC-beta             | PRKACB      | 91  | 500 |
| PKMYT1                | PKMYT1      | 99  | 500 |
| PKN1                  | PKN1        | 75  | 500 |
| PKN2                  | PKN2        | 100 | 500 |
| PKNB(M.tuberculosis)  | pknB        | 100 | 500 |



|                               |          |      |     |
|-------------------------------|----------|------|-----|
| PLK1                          | PLK1     | 100  | 500 |
| PLK2                          | PLK2     | 100  | 500 |
| PLK3                          | PLK3     | 92   | 500 |
| PLK4                          | PLK4     | 100  | 500 |
| PRKCD                         | PRKCD    | 88   | 500 |
| PRKCE                         | PRKCE    | 98   | 500 |
| PRKCH                         | PRKCH    | 100  | 500 |
| PRKCI                         | PRKCI    | 98   | 500 |
| PRKCQ                         | PRKCQ    | 94   | 500 |
| PRKD1                         | PRKD1    | 97   | 500 |
| PRKD2                         | PRKD2    | 100  | 500 |
| PRKD3                         | PRKD3    | 100  | 500 |
| PRKG1                         | PRKG1    | 93   | 500 |
| PRKG2                         | PRKG2    | 100  | 500 |
| PRKR                          | EIF2AK2  | 90   | 500 |
| PRKX                          | PRKX     | 97   | 500 |
| PRP4                          | PRPF4B   | 78   | 500 |
| PYK2                          | PTK2B    | 17   | 500 |
| QSK                           | KIAA0999 | 77   | 500 |
| RAF1                          | RAF1     | 93   | 500 |
| RET                           | RET      | 0.1  | 500 |
| RET(M918T)                    | RET      | 0.25 | 500 |
| RET(V804L)                    | RET      | 0.35 | 500 |
| RET(V804M)                    | RET      | 0.15 | 500 |
| RIOK1                         | RIOK1    | 97   | 500 |
| RIOK2                         | RIOK2    | 100  | 500 |
| RIOK3                         | RIOK3    | 86   | 500 |
| RIPK1                         | RIPK1    | 60   | 500 |
| RIPK2                         | RIPK2    | 83   | 500 |
| RIPK4                         | RIPK4    | 45   | 500 |
| RIPK5                         | DSTYK    | 96   | 500 |
| ROCK1                         | ROCK1    | 100  | 500 |
| ROCK2                         | ROCK2    | 27   | 500 |
| ROS1                          | ROS1     | 75   | 500 |
| RPS6KA4(Kin.Dom.1-N-terminal) | RPS6KA4  | 87   | 500 |
| RPS6KA4(Kin.Dom.2-C-terminal) | RPS6KA4  | 100  | 500 |
| RPS6KA5(Kin.Dom.1-N-terminal) | RPS6KA5  | 86   | 500 |
| RPS6KA5(Kin.Dom.2-C-terminal) | RPS6KA5  | 100  | 500 |
| RSK1(Kin.Dom.1-N-terminal)    | RPS6KA1  | 80   | 500 |
| RSK1(Kin.Dom.2-C-terminal)    | RPS6KA1  | 94   | 500 |

|                            |         |     |     |
|----------------------------|---------|-----|-----|
| RSK2(Kin.Dom.1-N-terminal) | RPS6KA3 | 66  | 500 |
| RSK2(Kin.Dom.2-C-terminal) | RPS6KA3 | 100 | 500 |
| RSK3(Kin.Dom.1-N-terminal) | RPS6KA2 | 100 | 500 |
| RSK3(Kin.Dom.2-C-terminal) | RPS6KA2 | 98  | 500 |
| RSK4(Kin.Dom.1-N-terminal) | RPS6KA6 | 73  | 500 |
| RSK4(Kin.Dom.2-C-terminal) | RPS6KA6 | 78  | 500 |
| S6K1                       | RPS6KB1 | 12  | 500 |
| SBK1                       | SBK1    | 91  | 500 |
| SGK                        | SGK1    | 100 | 500 |
| SgK110                     | SgK110  | 97  | 500 |
| SGK2                       | SGK2    | 100 | 500 |
| SGK3                       | SGK3    | 99  | 500 |
| SIK                        | SIK1    | 100 | 500 |
| SIK2                       | SIK2    | 100 | 500 |
| SLK                        | SLK     | 2.5 | 500 |
| SNARK                      | NUAK2   | 100 | 500 |
| SNRK                       | SNRK    | 100 | 500 |
| SRC                        | SRC     | 52  | 500 |
| SRMS                       | SRMS    | 91  | 500 |
| SRPK1                      | SRPK1   | 97  | 500 |
| SRPK2                      | SRPK2   | 78  | 500 |
| SRPK3                      | SRPK3   | 100 | 500 |
| STK16                      | STK16   | 91  | 500 |
| STK33                      | STK33   | 69  | 500 |
| STK35                      | STK35   | 78  | 500 |
| STK36                      | STK36   | 100 | 500 |
| STK39                      | STK39   | 100 | 500 |
| SYK                        | SYK     | 63  | 500 |
| TAK1                       | MAP3K7  | 3   | 500 |
| TAOK1                      | TAOK1   | 98  | 500 |
| TAOK2                      | TAOK2   | 62  | 500 |
| TAOK3                      | TAOK3   | 100 | 500 |
| TBK1                       | TBK1    | 64  | 500 |
| TEC                        | TEC     | 100 | 500 |
| TESK1                      | TESK1   | 80  | 500 |
| TGFBR1                     | TGFBR1  | 99  | 500 |
| TGFBR2                     | TGFBR2  | 100 | 500 |
| TIE1                       | TIE1    | 0   | 500 |
| TIE2                       | TEK     | 1.2 | 500 |
| TLK1                       | TLK1    | 95  | 500 |

|                              |         |      |     |
|------------------------------|---------|------|-----|
| TLK2                         | TLK2    | 100  | 500 |
| TNIK                         | TNIK    | 78   | 500 |
| TNK1                         | TNK1    | 43   | 500 |
| TNK2                         | TNK2    | 82   | 500 |
| TNNI3K                       | TNNI3K  | 42   | 500 |
| TRKA                         | NTRK1   | 0.6  | 500 |
| TRKB                         | NTRK2   | 0.55 | 500 |
| TRKC                         | NTRK3   | 1    | 500 |
| TRPM6                        | TRPM6   | 85   | 500 |
| TSSK1B                       | TSSK1B  | 75   | 500 |
| TSSK3                        | TSSK3   | 100  | 500 |
| TTK                          | TTK     | 66   | 500 |
| TXK                          | TXK     | 100  | 500 |
| TYK2(JH1domain-catalytic)    | TYK2    | 100  | 500 |
| TYK2(JH2domain-pseudokinase) | TYK2    | 100  | 500 |
| TYRO3                        | TYRO3   | 92   | 500 |
| ULK1                         | ULK1    | 100  | 500 |
| ULK2                         | ULK2    | 100  | 500 |
| ULK3                         | ULK3    | 62   | 500 |
| VEGFR2                       | KDR     | 3    | 500 |
| VPS34                        | PIK3C3  | 100  | 500 |
| VRK2                         | VRK2    | 93   | 500 |
| WEE1                         | WEE1    | 100  | 500 |
| WEE2                         | WEE2    | 90   | 500 |
| WNK1                         | WNK1    | 100  | 500 |
| WNK2                         | WNK2    | 100  | 500 |
| WNK3                         | WNK3    | 100  | 500 |
| WNK4                         | WNK4    | 100  | 500 |
| YANK1                        | STK32A  | 100  | 500 |
| YANK2                        | STK32B  | 100  | 500 |
| YANK3                        | STK32C  | 83   | 500 |
| YES                          | YES1    | 83   | 500 |
| YSK1                         | STK25   | 76   | 500 |
| YSK4                         | MAP3K19 | 40   | 500 |
| ZAK                          | ZAK     | 45   | 500 |
| ZAP70                        | ZAP70   | 100  | 500 |
| AAK1                         | AAK1    | 100  | 500 |

**Compound 11:**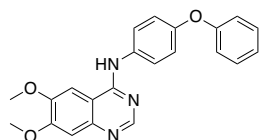

| DiscoverX Gene Symbol         | Entrez Gene Symbol | Percent Control | Compound Concentration (nM) |
|-------------------------------|--------------------|-----------------|-----------------------------|
| AAK1                          | AAK1               | 94              | 500                         |
| ABL1(E255K)-phosphorylated    | ABL1               | 38              | 500                         |
| ABL1(F317I)-nonphosphorylated | ABL1               | 87              | 500                         |
| ABL1(F317I)-phosphorylated    | ABL1               | 42              | 500                         |
| ABL1(F317L)-nonphosphorylated | ABL1               | 57              | 500                         |
| ABL1(F317L)-phosphorylated    | ABL1               | 6.6             | 500                         |
| ABL1(H396P)-nonphosphorylated | ABL1               | 40              | 500                         |
| ABL1(H396P)-phosphorylated    | ABL1               | 46              | 500                         |
| ABL1(M351T)-phosphorylated    | ABL1               | 24              | 500                         |
| ABL1(Q252H)-nonphosphorylated | ABL1               | 37              | 500                         |
| ABL1(Q252H)-phosphorylated    | ABL1               | 45              | 500                         |
| ABL1(T315I)-nonphosphorylated | ABL1               | 100             | 500                         |
| ABL1(T315I)-phosphorylated    | ABL1               | 57              | 500                         |
| ABL1(Y253F)-phosphorylated    | ABL1               | 37              | 500                         |
| ABL1-nonphosphorylated        | ABL1               | 33              | 500                         |
| ABL1-phosphorylated           | ABL1               | 40              | 500                         |
| ABL2                          | ABL2               | 86              | 500                         |
| ACVR1                         | ACVR1              | 100             | 500                         |
| ACVR1B                        | ACVR1B             | 81              | 500                         |
| ACVR2A                        | ACVR2A             | 100             | 500                         |
| ACVR2B                        | ACVR2B             | 90              | 500                         |
| ACVRL1                        | ACVRL1             | 84              | 500                         |
| ADCK3                         | CABC1              | 78              | 500                         |
| ADCK4                         | ADCK4              | 93              | 500                         |
| AKT1                          | AKT1               | 100             | 500                         |
| AKT2                          | AKT2               | 80              | 500                         |
| AKT3                          | AKT3               | 90              | 500                         |
| ALK                           | ALK                | 90              | 500                         |
| ALK(C1156Y)                   | ALK                | 100             | 500                         |
| ALK(L1196M)                   | ALK                | 100             | 500                         |
| AMPK-alpha1                   | PRKAA1             | 100             | 500                         |
| AMPK-alpha2                   | PRKAA2             | 91              | 500                         |

|             |        |      |     |
|-------------|--------|------|-----|
| ANKK1       | ANKK1  | 89   | 500 |
| ARK5        | NUAK1  | 83   | 500 |
| ASK1        | MAP3K5 | 100  | 500 |
| ASK2        | MAP3K6 | 65   | 500 |
| AURKA       | AURKA  | 100  | 500 |
| AURKB       | AURKB  | 75   | 500 |
| AURKC       | AURKC  | 74   | 500 |
| AXL         | AXL    | 71   | 500 |
| BIKE        | BMP2K  | 100  | 500 |
| BLK         | BLK    | 0.65 | 500 |
| BMPR1A      | BMPR1A | 76   | 500 |
| BMPR1B      | BMPR1B | 99   | 500 |
| BMPR2       | BMPR2  | 100  | 500 |
| BMX         | BMX    | 81   | 500 |
| BRAF        | BRAF   | 98   | 500 |
| BRAF(V600E) | BRAF   | 83   | 500 |
| BRK         | PTK6   | 16   | 500 |
| BRSK1       | BRSK1  | 100  | 500 |
| BRSK2       | BRSK2  | 98   | 500 |
| BTK         | BTK    | 13   | 500 |
| BUB1        | BUB1   | 100  | 500 |
| CAMK1       | CAMK1  | 74   | 500 |
| CAMK1B      | PNCK   | 92   | 500 |
| CAMK1D      | CAMK1D | 89   | 500 |
| CAMK1G      | CAMK1G | 95   | 500 |
| CAMK2A      | CAMK2A | 91   | 500 |
| CAMK2B      | CAMK2B | 94   | 500 |
| CAMK2D      | CAMK2D | 95   | 500 |
| CAMK2G      | CAMK2G | 94   | 500 |
| CAMK4       | CAMK4  | 100  | 500 |
| CAMKK1      | CAMKK1 | 91   | 500 |
| CAMKK2      | CAMKK2 | 88   | 500 |
| CASK        | CASK   | 82   | 500 |
| CDC2L1      | CDK11B | 94   | 500 |
| CDC2L2      | CDC2L2 | 100  | 500 |
| CDC2L5      | CDK13  | 100  | 500 |
| CDK11       | CDK19  | 90   | 500 |
| CDK2        | CDK2   | 94   | 500 |
| CDK3        | CDK3   | 97   | 500 |
| CDK4        | CDK4   | 100  | 500 |

|                     |          |     |     |
|---------------------|----------|-----|-----|
| CDK4-cyclinD1       | CDK4     | 99  | 500 |
| CDK4-cyclinD3       | CDK4     | 98  | 500 |
| CDK5                | CDK5     | 100 | 500 |
| CDK7                | CDK7     | 88  | 500 |
| CDK8                | CDK8     | 88  | 500 |
| CDK9                | CDK9     | 95  | 500 |
| CDKL1               | CDKL1    | 77  | 500 |
| CDKL2               | CDKL2    | 100 | 500 |
| CDKL3               | CDKL3    | 84  | 500 |
| CDKL5               | CDKL5    | 90  | 500 |
| CHEK1               | CHEK1    | 92  | 500 |
| CHEK2               | CHEK2    | 8.8 | 500 |
| CIT                 | CIT      | 97  | 500 |
| CLK1                | CLK1     | 100 | 500 |
| CLK2                | CLK2     | 95  | 500 |
| CLK3                | CLK3     | 81  | 500 |
| CLK4                | CLK4     | 90  | 500 |
| CSF1R               | CSF1R    | 72  | 500 |
| CSF1R-autoinhibited | CSF1R    | 100 | 500 |
| CSK                 | CSK      | 2.4 | 500 |
| CSNK1A1             | CSNK1A1  | 73  | 500 |
| CSNK1A1L            | CSNK1A1L | 96  | 500 |
| CSNK1D              | CSNK1D   | 93  | 500 |
| CSNK1E              | CSNK1E   | 74  | 500 |
| CSNK1G1             | CSNK1G1  | 79  | 500 |
| CSNK1G2             | CSNK1G2  | 95  | 500 |
| CSNK1G3             | CSNK1G3  | 100 | 500 |
| CSNK2A1             | CSNK2A1  | 96  | 500 |
| CSNK2A2             | CSNK2A2  | 100 | 500 |
| CTK                 | MATK     | 31  | 500 |
| DAPK1               | DAPK1    | 96  | 500 |
| DAPK2               | DAPK2    | 92  | 500 |
| DAPK3               | DAPK3    | 90  | 500 |
| DCAMKL1             | DCLK1    | 62  | 500 |
| DCAMKL2             | DCLK2    | 100 | 500 |
| DCAMKL3             | DCLK3    | 89  | 500 |
| DDR1                | DDR1     | 58  | 500 |
| DDR2                | DDR2     | 93  | 500 |
| DLK                 | MAP3K12  | 94  | 500 |
| DMPK                | DMPK     | 100 | 500 |

|                           |          |      |     |
|---------------------------|----------|------|-----|
| DMPK2                     | CDC42BPG | 91   | 500 |
| DRAK1                     | STK17A   | 94   | 500 |
| DRAK2                     | STK17B   | 81   | 500 |
| DYRK1A                    | DYRK1A   | 95   | 500 |
| DYRK1B                    | DYRK1B   | 100  | 500 |
| DYRK2                     | DYRK2    | 80   | 500 |
| EGFR                      | EGFR     | 0.6  | 500 |
| EGFR(E746-A750del)        | EGFR     | 79   | 500 |
| EGFR(G719C)               | EGFR     | 0.15 | 500 |
| EGFR(G719S)               | EGFR     | 0    | 500 |
| EGFR(L747-E749del, A750P) | EGFR     | 11   | 500 |
| EGFR(L747-S752del, P753S) | EGFR     | 43   | 500 |
| EGFR(L747-T751del,Sins)   | EGFR     | 14   | 500 |
| EGFR(L858R)               | EGFR     | 3.8  | 500 |
| EGFR(L858R,T790M)         | EGFR     | 55   | 500 |
| EGFR(L861Q)               | EGFR     | 0.55 | 500 |
| EGFR(S752-I759del)        | EGFR     | 0    | 500 |
| EGFR(T790M)               | EGFR     | 57   | 500 |
| EIF2AK1                   | EIF2AK1  | 100  | 500 |
| EPHA1                     | EPHA1    | 84   | 500 |
| EPHA2                     | EPHA2    | 99   | 500 |
| EPHA3                     | EPHA3    | 85   | 500 |
| EPHA4                     | EPHA4    | 100  | 500 |
| EPHA5                     | EPHA5    | 97   | 500 |
| EPHA6                     | EPHA6    | 94   | 500 |
| EPHA7                     | EPHA7    | 90   | 500 |
| EPHA8                     | EPHA8    | 71   | 500 |
| EPHB1                     | EPHB1    | 94   | 500 |
| EPHB2                     | EPHB2    | 71   | 500 |
| EPHB3                     | EPHB3    | 90   | 500 |
| EPHB4                     | EPHB4    | 100  | 500 |
| EPHB6                     | EPHB6    | 8.4  | 500 |
| ERBB2                     | ERBB2    | 0    | 500 |
| ERBB3                     | ERBB3    | 0    | 500 |
| ERBB4                     | ERBB4    | 0.4  | 500 |
| ERK1                      | MAPK3    | 97   | 500 |
| ERK2                      | MAPK1    | 100  | 500 |
| ERK3                      | MAPK6    | 86   | 500 |
| ERK4                      | MAPK4    | 71   | 500 |
| ERK5                      | MAPK7    | 85   | 500 |

|                       |         |     |     |
|-----------------------|---------|-----|-----|
| ERK8                  | MAPK15  | 100 | 500 |
| ERN1                  | ERN1    | 46  | 500 |
| FAK                   | PTK2    | 100 | 500 |
| FER                   | FER     | 76  | 500 |
| FES                   | FES     | 95  | 500 |
| FGFR1                 | FGFR1   | 100 | 500 |
| FGFR2                 | FGFR2   | 96  | 500 |
| FGFR3                 | FGFR3   | 92  | 500 |
| FGFR3(G697C)          | FGFR3   | 89  | 500 |
| FGFR4                 | FGFR4   | 78  | 500 |
| FGR                   | FGR     | 18  | 500 |
| FLT1                  | FLT1    | 82  | 500 |
| FLT3                  | FLT3    | 2.6 | 500 |
| FLT3(D835H)           | FLT3    | 17  | 500 |
| FLT3(D835V)           | FLT3    | 3.2 | 500 |
| FLT3(D835Y)           | FLT3    | 42  | 500 |
| FLT3(ITD)             | FLT3    | 23  | 500 |
| FLT3(ITD,D835V)       | FLT3    | 40  | 500 |
| FLT3(ITD,F691L)       | FLT3    | 100 | 500 |
| FLT3(K663Q)           | FLT3    | 8.2 | 500 |
| FLT3(N841I)           | FLT3    | 0.9 | 500 |
| FLT3(R834Q)           | FLT3    | 45  | 500 |
| FLT3-autoinhibited    | FLT3    | 83  | 500 |
| FLT4                  | FLT4    | 86  | 500 |
| FRK                   | FRK     | 58  | 500 |
| FYN                   | FYN     | 47  | 500 |
| GAK                   | GAK     | 78  | 500 |
| GCN2(Kin.Dom.2,S808G) | EIF2AK4 | 100 | 500 |
| GRK1                  | GRK1    | 100 | 500 |
| GRK2                  | ADRBK1  | 94  | 500 |
| GRK3                  | ADRBK2  | 97  | 500 |
| GRK4                  | GRK4    | 100 | 500 |
| GRK7                  | GRK7    | 90  | 500 |
| GSK3A                 | GSK3A   | 97  | 500 |
| GSK3B                 | GSK3B   | 100 | 500 |
| HASPIN                | GSG2    | 98  | 500 |
| HCK                   | HCK     | 5   | 500 |
| HIPK1                 | HIPK1   | 82  | 500 |
| HIPK2                 | HIPK2   | 100 | 500 |
| HIPK3                 | HIPK3   | 100 | 500 |



|                              |        |     |     |
|------------------------------|--------|-----|-----|
| HIPK4                        | HIPK4  | 59  | 500 |
| HPK1                         | MAP4K1 | 85  | 500 |
| HUNK                         | HUNK   | 100 | 500 |
| ICK                          | ICK    | 98  | 500 |
| IGF1R                        | IGF1R  | 100 | 500 |
| IKK-alpha                    | CHUK   | 100 | 500 |
| IKK-beta                     | IKBKB  | 100 | 500 |
| IKK-epsilon                  | IKBKE  | 98  | 500 |
| INSR                         | INSR   | 100 | 500 |
| INSRR                        | INSRR  | 100 | 500 |
| IRAK1                        | IRAK1  | 100 | 500 |
| IRAK3                        | IRAK3  | 96  | 500 |
| IRAK4                        | IRAK4  | 100 | 500 |
| ITK                          | ITK    | 98  | 500 |
| JAK1(JH1domain-catalytic)    | JAK1   | 100 | 500 |
| JAK1(JH2domain-pseudokinase) | JAK1   | 89  | 500 |
| JAK2(JH1domain-catalytic)    | JAK2   | 100 | 500 |
| JAK3(JH1domain-catalytic)    | JAK3   | 100 | 500 |
| JNK1                         | MAPK8  | 65  | 500 |
| JNK2                         | MAPK9  | 75  | 500 |
| JNK3                         | MAPK10 | 89  | 500 |
| KIT                          | KIT    | 66  | 500 |
| KIT(A829P)                   | KIT    | 66  | 500 |
| KIT(D816H)                   | KIT    | 93  | 500 |
| KIT(D816V)                   | KIT    | 85  | 500 |
| KIT(L576P)                   | KIT    | 84  | 500 |
| KIT(V559D)                   | KIT    | 40  | 500 |
| KIT(V559D,T670I)             | KIT    | 75  | 500 |
| KIT(V559D,V654A)             | KIT    | 20  | 500 |
| KIT-autoinhibited            | KIT    | 93  | 500 |
| LATS1                        | LATS1  | 100 | 500 |
| LATS2                        | LATS2  | 100 | 500 |
| LCK                          | LCK    | 3.7 | 500 |
| LIMK1                        | LIMK1  | 100 | 500 |
| LIMK2                        | LIMK2  | 87  | 500 |
| LKB1                         | STK11  | 89  | 500 |
| LOK                          | STK10  | 45  | 500 |
| LRRK2                        | LRRK2  | 100 | 500 |
| LRRK2(G2019S)                | LRRK2  | 100 | 500 |
| LTK                          | LTK    | 96  | 500 |

|             |          |      |     |
|-------------|----------|------|-----|
| LYN         | LYN      | 29   | 500 |
| LZK         | MAP3K13  | 100  | 500 |
| MAK         | MAK      | 98   | 500 |
| MAP3K1      | MAP3K1   | 75   | 500 |
| MAP3K15     | MAP3K15  | 54   | 500 |
| MAP3K2      | MAP3K2   | 89   | 500 |
| MAP3K3      | MAP3K3   | 97   | 500 |
| MAP3K4      | MAP3K4   | 98   | 500 |
| MAP4K2      | MAP4K2   | 89   | 500 |
| MAP4K3      | MAP4K3   | 95   | 500 |
| MAP4K4      | MAP4K4   | 100  | 500 |
| MAP4K5      | MAP4K5   | 100  | 500 |
| MAPKAPK2    | MAPKAPK2 | 100  | 500 |
| MAPKAPK5    | MAPKAPK5 | 91   | 500 |
| MARK1       | MARK1    | 86   | 500 |
| MARK2       | MARK2    | 92   | 500 |
| MARK3       | MARK3    | 76   | 500 |
| MARK4       | MARK4    | 85   | 500 |
| MAST1       | MAST1    | 100  | 500 |
| MEK1        | MAP2K1   | 8.3  | 500 |
| MEK2        | MAP2K2   | 17   | 500 |
| MEK3        | MAP2K3   | 94   | 500 |
| MEK4        | MAP2K4   | 89   | 500 |
| MEK5        | MAP2K5   | 0.05 | 500 |
| MEK6        | MAP2K6   | 92   | 500 |
| MELK        | MELK     | 95   | 500 |
| MERTK       | MERTK    | 82   | 500 |
| MET         | MET      | 100  | 500 |
| MET(M1250T) | MET      | 87   | 500 |
| MET(Y1235D) | MET      | 100  | 500 |
| MINK        | MINK1    | 81   | 500 |
| MKK7        | MAP2K7   | 100  | 500 |
| MKNK1       | MKNK1    | 100  | 500 |
| MKNK2       | MKNK2    | 29   | 500 |
| MLCK        | MYLK3    | 88   | 500 |
| MLK1        | MAP3K9   | 91   | 500 |
| MLK2        | MAP3K10  | 100  | 500 |
| MLK3        | MAP3K11  | 84   | 500 |
| MRCKA       | CDC42BPA | 99   | 500 |
| MRCKB       | CDC42BPB | 100  | 500 |

|           |          |     |     |
|-----------|----------|-----|-----|
| MST1      | STK4     | 99  | 500 |
| MST1R     | MST1R    | 92  | 500 |
| MST2      | STK3     | 90  | 500 |
| MST3      | STK24    | 98  | 500 |
| MST4      | MST4     | 91  | 500 |
| MTOR      | MTOR     | 100 | 500 |
| MUSK      | MUSK     | 93  | 500 |
| MYLK      | MYLK     | 88  | 500 |
| MYLK2     | MYLK2    | 84  | 500 |
| MYLK4     | MYLK4    | 81  | 500 |
| MYO3A     | MYO3A    | 98  | 500 |
| MYO3B     | MYO3B    | 75  | 500 |
| NDR1      | STK38    | 68  | 500 |
| NDR2      | STK38L   | 75  | 500 |
| NEK1      | NEK1     | 93  | 500 |
| NEK10     | NEK10    | 100 | 500 |
| NEK11     | NEK11    | 99  | 500 |
| NEK2      | NEK2     | 91  | 500 |
| NEK3      | NEK3     | 95  | 500 |
| NEK4      | NEK4     | 84  | 500 |
| NEK5      | NEK5     | 78  | 500 |
| NEK6      | NEK6     | 100 | 500 |
| NEK7      | NEK7     | 96  | 500 |
| NEK9      | NEK9     | 78  | 500 |
| NIK       | MAP3K14  | 54  | 500 |
| NIM1      | MGC42105 | 100 | 500 |
| NLK       | NLK      | 89  | 500 |
| OSR1      | OXR1     | 85  | 500 |
| p38-alpha | MAPK14   | 65  | 500 |
| p38-beta  | MAPK11   | 82  | 500 |
| p38-delta | MAPK13   | 84  | 500 |
| p38-gamma | MAPK12   | 62  | 500 |
| PAK1      | PAK1     | 92  | 500 |
| PAK2      | PAK2     | 90  | 500 |
| PAK3      | PAK3     | 99  | 500 |
| PAK4      | PAK4     | 92  | 500 |
| PAK6      | PAK6     | 90  | 500 |
| PAK7      | PAK7     | 100 | 500 |
| PCK1      | CDK16    | 92  | 500 |
| PCK2      | CDK17    | 93  | 500 |

|                       |             |     |     |
|-----------------------|-------------|-----|-----|
| PCTK3                 | CDK18       | 85  | 500 |
| PDGFRA                | PDGFRA      | 45  | 500 |
| PDGFRB                | PDGFRB      | 32  | 500 |
| PDPK1                 | PDPK1       | 98  | 500 |
| PFCDPK1(P.falciparum) | CDPK1       | 9.2 | 500 |
| PFPK5(P.falciparum)   | MAL13P1.279 | 100 | 500 |
| PFTAIRE2              | CDK15       | 81  | 500 |
| PFTK1                 | CDK14       | 73  | 500 |
| PHKG1                 | PHKG1       | 94  | 500 |
| PHKG2                 | PHKG2       | 82  | 500 |
| PIK3C2B               | PIK3C2B     | 100 | 500 |
| PIK3C2G               | PIK3C2G     | 95  | 500 |
| PIK3CA                | PIK3CA      | 100 | 500 |
| PIK3CA(C420R)         | PIK3CA      | 85  | 500 |
| PIK3CA(E542K)         | PIK3CA      | 100 | 500 |
| PIK3CA(E545A)         | PIK3CA      | 93  | 500 |
| PIK3CA(E545K)         | PIK3CA      | 69  | 500 |
| PIK3CA(H1047L)        | PIK3CA      | 100 | 500 |
| PIK3CA(H1047Y)        | PIK3CA      | 86  | 500 |
| PIK3CA(I800L)         | PIK3CA      | 49  | 500 |
| PIK3CA(M1043I)        | PIK3CA      | 100 | 500 |
| PIK3CA(Q546K)         | PIK3CA      | 91  | 500 |
| PIK3CB                | PIK3CB      | 94  | 500 |
| PIK3CD                | PIK3CD      | 90  | 500 |
| PIK3CG                | PIK3CG      | 100 | 500 |
| PIK4CB                | PI4KB       | 96  | 500 |
| PIKFYVE               | PIKFYVE     | 99  | 500 |
| PIM1                  | PIM1        | 99  | 500 |
| PIM2                  | PIM2        | 100 | 500 |
| PIM3                  | PIM3        | 94  | 500 |
| PIP5K1A               | PIP5K1A     | 95  | 500 |
| PIP5K1C               | PIP5K1C     | 98  | 500 |
| PIP5K2B               | PIP4K2B     | 96  | 500 |
| PIP5K2C               | PIP4K2C     | 67  | 500 |
| PKAC-alpha            | PRKACA      | 100 | 500 |
| PKAC-beta             | PRKACB      | 91  | 500 |
| PKMYT1                | PKMYT1      | 100 | 500 |
| PKN1                  | PKN1        | 73  | 500 |
| PKN2                  | PKN2        | 94  | 500 |
| PKNB(M.tuberculosis)  | pknB        | 100 | 500 |

|                               |          |      |     |
|-------------------------------|----------|------|-----|
| PLK1                          | PLK1     | 100  | 500 |
| PLK2                          | PLK2     | 100  | 500 |
| PLK3                          | PLK3     | 87   | 500 |
| PLK4                          | PLK4     | 100  | 500 |
| PRKCD                         | PRKCD    | 98   | 500 |
| PRKCE                         | PRKCE    | 100  | 500 |
| PRKCH                         | PRKCH    | 87   | 500 |
| PRKCI                         | PRKCI    | 93   | 500 |
| PRKCQ                         | PRKCQ    | 76   | 500 |
| PRKD1                         | PRKD1    | 100  | 500 |
| PRKD2                         | PRKD2    | 98   | 500 |
| PRKD3                         | PRKD3    | 88   | 500 |
| PRKG1                         | PRKG1    | 91   | 500 |
| PRKG2                         | PRKG2    | 100  | 500 |
| PRKR                          | EIF2AK2  | 100  | 500 |
| PRKX                          | PRKX     | 99   | 500 |
| PRP4                          | PRPF4B   | 68   | 500 |
| PYK2                          | PTK2B    | 96   | 500 |
| QSK                           | KIAA0999 | 75   | 500 |
| RAF1                          | RAF1     | 83   | 500 |
| RET                           | RET      | 38   | 500 |
| RET(M918T)                    | RET      | 51   | 500 |
| RET(V804L)                    | RET      | 94   | 500 |
| RET(V804M)                    | RET      | 100  | 500 |
| RIOK1                         | RIOK1    | 80   | 500 |
| RIOK2                         | RIOK2    | 100  | 500 |
| RIOK3                         | RIOK3    | 92   | 500 |
| RIPK1                         | RIPK1    | 73   | 500 |
| RIPK2                         | RIPK2    | 0.25 | 500 |
| RIPK4                         | RIPK4    | 96   | 500 |
| RIPK5                         | DSTYK    | 88   | 500 |
| ROCK1                         | ROCK1    | 80   | 500 |
| ROCK2                         | ROCK2    | 98   | 500 |
| ROS1                          | ROS1     | 72   | 500 |
| RPS6KA4(Kin.Dom.1-N-terminal) | RPS6KA4  | 87   | 500 |
| RPS6KA4(Kin.Dom.2-C-terminal) | RPS6KA4  | 100  | 500 |
| RPS6KA5(Kin.Dom.1-N-terminal) | RPS6KA5  | 89   | 500 |
| RPS6KA5(Kin.Dom.2-C-terminal) | RPS6KA5  | 97   | 500 |
| RSK1(Kin.Dom.1-N-terminal)    | RPS6KA1  | 76   | 500 |
| RSK1(Kin.Dom.2-C-terminal)    | RPS6KA1  | 97   | 500 |

|                            |         |     |     |
|----------------------------|---------|-----|-----|
| RSK2(Kin.Dom.1-N-terminal) | RPS6KA3 | 83  | 500 |
| RSK2(Kin.Dom.2-C-terminal) | RPS6KA3 | 100 | 500 |
| RSK3(Kin.Dom.1-N-terminal) | RPS6KA2 | 92  | 500 |
| RSK3(Kin.Dom.2-C-terminal) | RPS6KA2 | 100 | 500 |
| RSK4(Kin.Dom.1-N-terminal) | RPS6KA6 | 83  | 500 |
| RSK4(Kin.Dom.2-C-terminal) | RPS6KA6 | 78  | 500 |
| S6K1                       | RPS6KB1 | 83  | 500 |
| SBK1                       | SBK1    | 84  | 500 |
| SGK                        | SGK1    | 100 | 500 |
| SgK110                     | SgK110  | 100 | 500 |
| SGK2                       | SGK2    | 100 | 500 |
| SGK3                       | SGK3    | 95  | 500 |
| SIK                        | SIK1    | 75  | 500 |
| SIK2                       | SIK2    | 100 | 500 |
| SLK                        | SLK     | 78  | 500 |
| SNARK                      | NUAK2   | 99  | 500 |
| SNRK                       | SNRK    | 99  | 500 |
| SRC                        | SRC     | 22  | 500 |
| SRMS                       | SRMS    | 1.5 | 500 |
| SRPK1                      | SRPK1   | 94  | 500 |
| SRPK2                      | SRPK2   | 62  | 500 |
| SRPK3                      | SRPK3   | 100 | 500 |
| STK16                      | STK16   | 99  | 500 |
| STK33                      | STK33   | 99  | 500 |
| STK35                      | STK35   | 74  | 500 |
| STK36                      | STK36   | 80  | 500 |
| STK39                      | STK39   | 99  | 500 |
| SYK                        | SYK     | 90  | 500 |
| TAK1                       | MAP3K7  | 89  | 500 |
| TAOK1                      | TAOK1   | 100 | 500 |
| TAOK2                      | TAOK2   | 73  | 500 |
| TAOK3                      | TAOK3   | 100 | 500 |
| TBK1                       | TBK1    | 67  | 500 |
| TEC                        | TEC     | 31  | 500 |
| TESK1                      | TESK1   | 79  | 500 |
| TGFBR1                     | TGFBR1  | 79  | 500 |
| TGFBR2                     | TGFBR2  | 95  | 500 |
| TIE1                       | TIE1    | 100 | 500 |
| TIE2                       | TEK     | 80  | 500 |
| TLK1                       | TLK1    | 96  | 500 |

|                              |         |     |     |
|------------------------------|---------|-----|-----|
| TLK2                         | TLK2    | 100 | 500 |
| TNIK                         | TNIK    | 89  | 500 |
| TNK1                         | TNK1    | 93  | 500 |
| TNK2                         | TNK2    | 99  | 500 |
| TNNI3K                       | TNNI3K  | 84  | 500 |
| TRKA                         | NTRK1   | 100 | 500 |
| TRKB                         | NTRK2   | 100 | 500 |
| TRKC                         | NTRK3   | 100 | 500 |
| TRPM6                        | TRPM6   | 73  | 500 |
| TSSK1B                       | TSSK1B  | 88  | 500 |
| TSSK3                        | TSSK3   | 91  | 500 |
| TTK                          | TTK     | 95  | 500 |
| TXK                          | TXK     | 75  | 500 |
| TYK2(JH1domain-catalytic)    | TYK2    | 100 | 500 |
| TYK2(JH2domain-pseudokinase) | TYK2    | 100 | 500 |
| TYRO3                        | TYRO3   | 51  | 500 |
| ULK1                         | ULK1    | 96  | 500 |
| ULK2                         | ULK2    | 100 | 500 |
| ULK3                         | ULK3    | 81  | 500 |
| VEGFR2                       | KDR     | 82  | 500 |
| VPS34                        | PIK3C3  | 97  | 500 |
| VRK2                         | VRK2    | 92  | 500 |
| WEE1                         | WEE1    | 100 | 500 |
| WEE2                         | WEE2    | 79  | 500 |
| WNK1                         | WNK1    | 97  | 500 |
| WNK2                         | WNK2    | 100 | 500 |
| WNK3                         | WNK3    | 100 | 500 |
| WNK4                         | WNK4    | 100 | 500 |
| YANK1                        | STK32A  | 100 | 500 |
| YANK2                        | STK32B  | 100 | 500 |
| YANK3                        | STK32C  | 84  | 500 |
| YES                          | YES1    | 26  | 500 |
| YSK1                         | STK25   | 100 | 500 |
| YSK4                         | MAP3K19 | 94  | 500 |
| ZAK                          | ZAK     | 58  | 500 |
| ZAP70                        | ZAP70   | 100 | 500 |

**Compound 6:**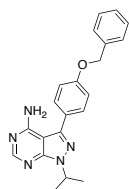

| DiscoverX Gene Symbol         | Entrez Gene Symbol | Percent Control | Compound Concentration (nM) |
|-------------------------------|--------------------|-----------------|-----------------------------|
| ABL1(E255K)-phosphorylated    | ABL1               | 57              | 500                         |
| ABL1(F317I)-nonphosphorylated | ABL1               | 35              | 500                         |
| ABL1(F317I)-phosphorylated    | ABL1               | 76              | 500                         |
| ABL1(F317L)-nonphosphorylated | ABL1               | 27              | 500                         |
| ABL1(F317L)-phosphorylated    | ABL1               | 57              | 500                         |
| ABL1(H396P)-nonphosphorylated | ABL1               | 51              | 500                         |
| ABL1(H396P)-phosphorylated    | ABL1               | 54              | 500                         |
| ABL1(M351T)-phosphorylated    | ABL1               | 78              | 500                         |
| ABL1(Q252H)-nonphosphorylated | ABL1               | 26              | 500                         |
| ABL1(Q252H)-phosphorylated    | ABL1               | 59              | 500                         |
| ABL1(T315I)-nonphosphorylated | ABL1               | 89              | 500                         |
| ABL1(T315I)-phosphorylated    | ABL1               | 88              | 500                         |
| ABL1(Y253F)-phosphorylated    | ABL1               | 64              | 500                         |
| ABL1-nonphosphorylated        | ABL1               | 23              | 500                         |
| ABL1-phosphorylated           | ABL1               | 53              | 500                         |
| ABL2                          | ABL2               | 58              | 500                         |
| ACVR1                         | ACVR1              | 100             | 500                         |
| ACVR1B                        | ACVR1B             | 99              | 500                         |
| ACVR2A                        | ACVR2A             | 100             | 500                         |
| ACVR2B                        | ACVR2B             | 92              | 500                         |
| ACVRL1                        | ACVRL1             | 100             | 500                         |
| ADCK3                         | CABC1              | 66              | 500                         |
| ADCK4                         | ADCK4              | 79              | 500                         |
| AKT1                          | AKT1               | 84              | 500                         |
| AKT2                          | AKT2               | 46              | 500                         |
| AKT3                          | AKT3               | 100             | 500                         |
| ALK                           | ALK                | 77              | 500                         |



|             |        |      |     |
|-------------|--------|------|-----|
| ALK(C1156Y) | ALK    | 89   | 500 |
| ALK(L1196M) | ALK    | 96   | 500 |
| AMPK-alpha1 | PRKAA1 | 76   | 500 |
| AMPK-alpha2 | PRKAA2 | 74   | 500 |
| ANKK1       | ANKK1  | 93   | 500 |
| ARK5        | NUAK1  | 96   | 500 |
| ASK1        | MAP3K5 | 97   | 500 |
| ASK2        | MAP3K6 | 100  | 500 |
| AURKA       | AURKA  | 15   | 500 |
| AURKB       | AURKB  | 24   | 500 |
| AURKC       | AURKC  | 2.5  | 500 |
| AXL         | AXL    | 47   | 500 |
| BIKE        | BMP2K  | 88   | 500 |
| BLK         | BLK    | 0.35 | 500 |
| BMPR1A      | BMPR1A | 92   | 500 |
| BMPR1B      | BMPR1B | 86   | 500 |
| BMPR2       | BMPR2  | 93   | 500 |
| BMX         | BMX    | 20   | 500 |
| BRAF        | BRAF   | 68   | 500 |
| BRAF(V600E) | BRAF   | 38   | 500 |
| BRK         | PTK6   | 1.8  | 500 |
| BRSK1       | BRSK1  | 96   | 500 |
| BRSK2       | BRSK2  | 95   | 500 |
| BTK         | BTK    | 0.35 | 500 |
| BUB1        | BUB1   | 95   | 500 |
| CAMK1       | CAMK1  | 76   | 500 |
| CAMK1B      | PNCK   | 100  | 500 |
| CAMK1D      | CAMK1D | 85   | 500 |
| CAMK1G      | CAMK1G | 100  | 500 |
| CAMK2A      | CAMK2A | 91   | 500 |
| CAMK2B      | CAMK2B | 82   | 500 |
| CAMK2D      | CAMK2D | 95   | 500 |
| CAMK2G      | CAMK2G | 100  | 500 |
| CAMK4       | CAMK4  | 91   | 500 |
| CAMKK1      | CAMKK1 | 94   | 500 |
| CAMKK2      | CAMKK2 | 91   | 500 |
| CASK        | CASK   | 87   | 500 |
| CDC2L1      | CDK11B | 91   | 500 |
| CDC2L2      | CDC2L2 | 85   | 500 |
| CDC2L5      | CDK13  | 100  | 500 |

|                     |          |     |     |
|---------------------|----------|-----|-----|
| CDK11               | CDK19    | 77  | 500 |
| CDK2                | CDK2     | 91  | 500 |
| CDK3                | CDK3     | 87  | 500 |
| CDK4                | CDK4     | 92  | 500 |
| CDK4-cyclinD1       | CDK4     | 96  | 500 |
| CDK4-cyclinD3       | CDK4     | 78  | 500 |
| CDK5                | CDK5     | 100 | 500 |
| CDK7                | CDK7     | 71  | 500 |
| CDK8                | CDK8     | 94  | 500 |
| CDK9                | CDK9     | 97  | 500 |
| CDKL1               | CDKL1    | 67  | 500 |
| CDKL2               | CDKL2    | 100 | 500 |
| CDKL3               | CDKL3    | 88  | 500 |
| CDKL5               | CDKL5    | 93  | 500 |
| CHEK1               | CHEK1    | 83  | 500 |
| CHEK2               | CHEK2    | 95  | 500 |
| CIT                 | CIT      | 100 | 500 |
| CLK1                | CLK1     | 82  | 500 |
| CLK2                | CLK2     | 82  | 500 |
| CLK3                | CLK3     | 88  | 500 |
| CLK4                | CLK4     | 97  | 500 |
| CSF1R               | CSF1R    | 3.5 | 500 |
| CSF1R-autoinhibited | CSF1R    | 100 | 500 |
| CSK                 | CSK      | 3.5 | 500 |
| CSNK1A1             | CSNK1A1  | 66  | 500 |
| CSNK1A1L            | CSNK1A1L | 84  | 500 |
| CSNK1D              | CSNK1D   | 84  | 500 |
| CSNK1E              | CSNK1E   | 11  | 500 |
| CSNK1G1             | CSNK1G1  | 88  | 500 |
| CSNK1G2             | CSNK1G2  | 93  | 500 |
| CSNK1G3             | CSNK1G3  | 94  | 500 |
| CSNK2A1             | CSNK2A1  | 83  | 500 |
| CSNK2A2             | CSNK2A2  | 100 | 500 |
| CTK                 | MATK     | 59  | 500 |
| DAPK1               | DAPK1    | 97  | 500 |
| DAPK2               | DAPK2    | 85  | 500 |
| DAPK3               | DAPK3    | 86  | 500 |
| DCAMKL1             | DCLK1    | 89  | 500 |
| DCAMKL2             | DCLK2    | 87  | 500 |
| DCAMKL3             | DCLK3    | 100 | 500 |

|                           |          |     |     |
|---------------------------|----------|-----|-----|
| DDR1                      | DDR1     | 54  | 500 |
| DDR2                      | DDR2     | 92  | 500 |
| DLK                       | MAP3K12  | 81  | 500 |
| DMPK                      | DMPK     | 100 | 500 |
| DMPK2                     | CDC42BPG | 93  | 500 |
| DRAK1                     | STK17A   | 98  | 500 |
| DRAK2                     | STK17B   | 94  | 500 |
| DYRK1A                    | DYRK1A   | 80  | 500 |
| DYRK1B                    | DYRK1B   | 88  | 500 |
| DYRK2                     | DYRK2    | 88  | 500 |
| EGFR                      | EGFR     | 6.1 | 500 |
| EGFR(E746-A750del)        | EGFR     | 95  | 500 |
| EGFR(G719C)               | EGFR     | 4.9 | 500 |
| EGFR(G719S)               | EGFR     | 4.5 | 500 |
| EGFR(L747-E749del, A750P) | EGFR     | 63  | 500 |
| EGFR(L747-S752del, P753S) | EGFR     | 63  | 500 |
| EGFR(L747-T751del,Sins)   | EGFR     | 49  | 500 |
| EGFR(L858R)               | EGFR     | 52  | 500 |
| EGFR(L858R,T790M)         | EGFR     | 70  | 500 |
| EGFR(L861Q)               | EGFR     | 19  | 500 |
| EGFR(S752-I759del)        | EGFR     | 58  | 500 |
| EGFR(T790M)               | EGFR     | 1.4 | 500 |
| EIF2AK1                   | EIF2AK1  | 92  | 500 |
| EPHA1                     | EPHA1    | 55  | 500 |
| EPHA2                     | EPHA2    | 78  | 500 |
| EPHA3                     | EPHA3    | 96  | 500 |
| EPHA4                     | EPHA4    | 100 | 500 |
| EPHA5                     | EPHA5    | 100 | 500 |
| EPHA6                     | EPHA6    | 90  | 500 |
| EPHA7                     | EPHA7    | 95  | 500 |
| EPHA8                     | EPHA8    | 68  | 500 |
| EPHB1                     | EPHB1    | 100 | 500 |
| EPHB2                     | EPHB2    | 64  | 500 |
| EPHB3                     | EPHB3    | 100 | 500 |
| EPHB4                     | EPHB4    | 92  | 500 |
| EPHB6                     | EPHB6    | 3.4 | 500 |
| ERBB2                     | ERBB2    | 0   | 500 |
| ERBB3                     | ERBB3    | 4.7 | 500 |
| ERBB4                     | ERBB4    | 13  | 500 |
| ERK1                      | MAPK3    | 88  | 500 |

|                       |         |     |     |
|-----------------------|---------|-----|-----|
| ERK2                  | MAPK1   | 99  | 500 |
| ERK3                  | MAPK6   | 93  | 500 |
| ERK4                  | MAPK4   | 87  | 500 |
| ERK5                  | MAPK7   | 76  | 500 |
| ERK8                  | MAPK15  | 86  | 500 |
| ERN1                  | ERN1    | 69  | 500 |
| FAK                   | PTK2    | 86  | 500 |
| FER                   | FER     | 99  | 500 |
| FES                   | FES     | 82  | 500 |
| FGFR1                 | FGFR1   | 92  | 500 |
| FGFR2                 | FGFR2   | 61  | 500 |
| FGFR3                 | FGFR3   | 77  | 500 |
| FGFR3(G697C)          | FGFR3   | 100 | 500 |
| FGFR4                 | FGFR4   | 98  | 500 |
| FGR                   | FGR     | 8.5 | 500 |
| FLT1                  | FLT1    | 42  | 500 |
| FLT3                  | FLT3    | 3.5 | 500 |
| FLT3(D835H)           | FLT3    | 49  | 500 |
| FLT3(D835V)           | FLT3    | 40  | 500 |
| FLT3(D835Y)           | FLT3    | 8.7 | 500 |
| FLT3(ITD)             | FLT3    | 15  | 500 |
| FLT3(ITD,D835V)       | FLT3    | 77  | 500 |
| FLT3(ITD,F691L)       | FLT3    | 96  | 500 |
| FLT3(K663Q)           | FLT3    | 26  | 500 |
| FLT3(N841I)           | FLT3    | 23  | 500 |
| FLT3(R834Q)           | FLT3    | 74  | 500 |
| FLT3-autoinhibited    | FLT3    | 62  | 500 |
| FLT4                  | FLT4    | 61  | 500 |
| FRK                   | FRK     | 25  | 500 |
| FYN                   | FYN     | 12  | 500 |
| GAK                   | GAK     | 51  | 500 |
| GCN2(Kin.Dom.2,S808G) | EIF2AK4 | 63  | 500 |
| GRK1                  | GRK1    | 93  | 500 |
| GRK2                  | ADRBK1  | 100 | 500 |
| GRK3                  | ADRBK2  | 89  | 500 |
| GRK4                  | GRK4    | 87  | 500 |
| GRK7                  | GRK7    | 83  | 500 |
| GSK3A                 | GSK3A   | 89  | 500 |
| GSK3B                 | GSK3B   | 74  | 500 |
| HASPIN                | GSG2    | 96  | 500 |

|                              |        |     |     |
|------------------------------|--------|-----|-----|
| HCK                          | HCK    | 1.4 | 500 |
| HIPK1                        | HIPK1  | 74  | 500 |
| HIPK2                        | HIPK2  | 98  | 500 |
| HIPK3                        | HIPK3  | 100 | 500 |
| HIPK4                        | HIPK4  | 81  | 500 |
| HPK1                         | MAP4K1 | 96  | 500 |
| HUNK                         | HUNK   | 84  | 500 |
| ICK                          | ICK    | 100 | 500 |
| IGF1R                        | IGF1R  | 86  | 500 |
| IKK-alpha                    | CHUK   | 84  | 500 |
| IKK-beta                     | IKBKB  | 69  | 500 |
| IKK-epsilon                  | IKBKE  | 47  | 500 |
| INSR                         | INSR   | 69  | 500 |
| INSRR                        | INSRR  | 81  | 500 |
| IRAK1                        | IRAK1  | 98  | 500 |
| IRAK3                        | IRAK3  | 78  | 500 |
| IRAK4                        | IRAK4  | 86  | 500 |
| ITK                          | ITK    | 83  | 500 |
| JAK1(JH1domain-catalytic)    | JAK1   | 100 | 500 |
| JAK1(JH2domain-pseudokinase) | JAK1   | 100 | 500 |
| JAK2(JH1domain-catalytic)    | JAK2   | 91  | 500 |
| JAK3(JH1domain-catalytic)    | JAK3   | 100 | 500 |
| JNK1                         | MAPK8  | 81  | 500 |
| JNK2                         | MAPK9  | 96  | 500 |
| JNK3                         | MAPK10 | 96  | 500 |
| KIT                          | KIT    | 1.2 | 500 |
| KIT(A829P)                   | KIT    | 59  | 500 |
| KIT(D816H)                   | KIT    | 100 | 500 |
| KIT(D816V)                   | KIT    | 68  | 500 |
| KIT(L576P)                   | KIT    | 1.8 | 500 |
| KIT(V559D)                   | KIT    | 0.7 | 500 |
| KIT(V559D,T670I)             | KIT    | 48  | 500 |
| KIT(V559D,V654A)             | KIT    | 46  | 500 |
| KIT-autoinhibited            | KIT    | 66  | 500 |
| LATS1                        | LATS1  | 56  | 500 |
| LATS2                        | LATS2  | 49  | 500 |
| LCK                          | LCK    | 1.6 | 500 |
| LIMK1                        | LIMK1  | 56  | 500 |
| LIMK2                        | LIMK2  | 86  | 500 |
| LKB1                         | STK11  | 96  | 500 |

|               |          |     |     |
|---------------|----------|-----|-----|
| LOK           | STK10    | 9.2 | 500 |
| LRRK2         | LRRK2    | 100 | 500 |
| LRRK2(G2019S) | LRRK2    | 71  | 500 |
| LTK           | LTK      | 69  | 500 |
| LYN           | LYN      | 15  | 500 |
| LZK           | MAP3K13  | 94  | 500 |
| MAK           | MAK      | 100 | 500 |
| MAP3K1        | MAP3K1   | 84  | 500 |
| MAP3K15       | MAP3K15  | 73  | 500 |
| MAP3K2        | MAP3K2   | 53  | 500 |
| MAP3K3        | MAP3K3   | 57  | 500 |
| MAP3K4        | MAP3K4   | 82  | 500 |
| MAP4K2        | MAP4K2   | 92  | 500 |
| MAP4K3        | MAP4K3   | 0.4 | 500 |
| MAP4K4        | MAP4K4   | 98  | 500 |
| MAP4K5        | MAP4K5   | 78  | 500 |
| MAPKAPK2      | MAPKAPK2 | 100 | 500 |
| MAPKAPK5      | MAPKAPK5 | 95  | 500 |
| MARK1         | MARK1    | 87  | 500 |
| MARK2         | MARK2    | 100 | 500 |
| MARK3         | MARK3    | 91  | 500 |
| MARK4         | MARK4    | 95  | 500 |
| MAST1         | MAST1    | 90  | 500 |
| MEK1          | MAP2K1   | 0   | 500 |
| MEK2          | MAP2K2   | 0.1 | 500 |
| MEK3          | MAP2K3   | 82  | 500 |
| MEK4          | MAP2K4   | 74  | 500 |
| MEK5          | MAP2K5   | 0   | 500 |
| MEK6          | MAP2K6   | 95  | 500 |
| MELK          | MELK     | 70  | 500 |
| MERTK         | MERTK    | 30  | 500 |
| MET           | MET      | 54  | 500 |
| MET(M1250T)   | MET      | 78  | 500 |
| MET(Y1235D)   | MET      | 73  | 500 |
| MINK          | MINK1    | 70  | 500 |
| MKK7          | MAP2K7   | 100 | 500 |
| MKNK1         | MKNK1    | 91  | 500 |
| MKNK2         | MKNK2    | 71  | 500 |
| MLCK          | MYLK3    | 91  | 500 |
| MLK1          | MAP3K9   | 89  | 500 |

|           |          |     |     |
|-----------|----------|-----|-----|
| MLK2      | MAP3K10  | 100 | 500 |
| MLK3      | MAP3K11  | 85  | 500 |
| MRCKA     | CDC42BPA | 79  | 500 |
| MRCKB     | CDC42BPB | 86  | 500 |
| MST1      | STK4     | 45  | 500 |
| MST1R     | MST1R    | 82  | 500 |
| MST2      | STK3     | 100 | 500 |
| MST3      | STK24    | 93  | 500 |
| MST4      | MST4     | 100 | 500 |
| MTOR      | MTOR     | 81  | 500 |
| MUSK      | MUSK     | 93  | 500 |
| MYLK      | MYLK     | 56  | 500 |
| MYLK2     | MYLK2    | 88  | 500 |
| MYLK4     | MYLK4    | 93  | 500 |
| MYO3A     | MYO3A    | 81  | 500 |
| MYO3B     | MYO3B    | 74  | 500 |
| NDR1      | STK38    | 79  | 500 |
| NDR2      | STK38L   | 76  | 500 |
| NEK1      | NEK1     | 100 | 500 |
| NEK10     | NEK10    | 99  | 500 |
| NEK11     | NEK11    | 98  | 500 |
| NEK2      | NEK2     | 95  | 500 |
| NEK3      | NEK3     | 83  | 500 |
| NEK4      | NEK4     | 94  | 500 |
| NEK5      | NEK5     | 87  | 500 |
| NEK6      | NEK6     | 83  | 500 |
| NEK7      | NEK7     | 93  | 500 |
| NEK9      | NEK9     | 98  | 500 |
| NIK       | MAP3K14  | 93  | 500 |
| NIM1      | MGC42105 | 100 | 500 |
| NLK       | NLK      | 49  | 500 |
| OSR1      | OXR1     | 96  | 500 |
| p38-alpha | MAPK14   | 95  | 500 |
| p38-beta  | MAPK11   | 82  | 500 |
| p38-delta | MAPK13   | 100 | 500 |
| p38-gamma | MAPK12   | 73  | 500 |
| PAK1      | PAK1     | 89  | 500 |
| PAK2      | PAK2     | 93  | 500 |
| PAK3      | PAK3     | 87  | 500 |
| PAK4      | PAK4     | 86  | 500 |

|                       |             |     |     |
|-----------------------|-------------|-----|-----|
| PAK6                  | PAK6        | 84  | 500 |
| PAK7                  | PAK7        | 100 | 500 |
| PCKT1                 | CDK16       | 99  | 500 |
| PCKT2                 | CDK17       | 79  | 500 |
| PCKT3                 | CDK18       | 100 | 500 |
| PDGFRA                | PDGFRA      | 30  | 500 |
| PDGFRB                | PDGFRB      | 2.7 | 500 |
| PDPK1                 | PDPK1       | 83  | 500 |
| PFCDPK1(P.falciparum) | CDPK1       | 0   | 500 |
| PFPK5(P.falciparum)   | MAL13P1.279 | 97  | 500 |
| PFTAIRE2              | CDK15       | 97  | 500 |
| PFTK1                 | CDK14       | 72  | 500 |
| PHKG1                 | PHKG1       | 83  | 500 |
| PHKG2                 | PHKG2       | 71  | 500 |
| PIK3C2B               | PIK3C2B     | 86  | 500 |
| PIK3C2G               | PIK3C2G     | 88  | 500 |
| PIK3CA                | PIK3CA      | 100 | 500 |
| PIK3CA(C420R)         | PIK3CA      | 89  | 500 |
| PIK3CA(E542K)         | PIK3CA      | 95  | 500 |
| PIK3CA(E545A)         | PIK3CA      | 86  | 500 |
| PIK3CA(E545K)         | PIK3CA      | 83  | 500 |
| PIK3CA(H1047L)        | PIK3CA      | 100 | 500 |
| PIK3CA(H1047Y)        | PIK3CA      | 72  | 500 |
| PIK3CA(I800L)         | PIK3CA      | 93  | 500 |
| PIK3CA(M1043I)        | PIK3CA      | 93  | 500 |
| PIK3CA(Q546K)         | PIK3CA      | 100 | 500 |
| PIK3CB                | PIK3CB      | 95  | 500 |
| PIK3CD                | PIK3CD      | 73  | 500 |
| PIK3CG                | PIK3CG      | 97  | 500 |
| PIK4CB                | PI4KB       | 100 | 500 |
| PIKFYVE               | PIKFYVE     | 100 | 500 |
| PIM1                  | PIM1        | 91  | 500 |
| PIM2                  | PIM2        | 100 | 500 |
| PIM3                  | PIM3        | 98  | 500 |
| PIP5K1A               | PIP5K1A     | 78  | 500 |
| PIP5K1C               | PIP5K1C     | 91  | 500 |
| PIP5K2B               | PIP4K2B     | 100 | 500 |
| PIP5K2C               | PIP4K2C     | 89  | 500 |
| PKAC-alpha            | PRKACA      | 98  | 500 |
| PKAC-beta             | PRKACB      | 96  | 500 |



|                               |          |     |     |
|-------------------------------|----------|-----|-----|
| PKMYT1                        | PKMYT1   | 65  | 500 |
| PKN1                          | PKN1     | 79  | 500 |
| PKN2                          | PKN2     | 100 | 500 |
| PKNB(M.tuberculosis)          | pknB     | 75  | 500 |
| PLK1                          | PLK1     | 99  | 500 |
| PLK2                          | PLK2     | 100 | 500 |
| PLK3                          | PLK3     | 92  | 500 |
| PLK4                          | PLK4     | 76  | 500 |
| PRKCD                         | PRKCD    | 96  | 500 |
| PRKCE                         | PRKCE    | 100 | 500 |
| PRKCH                         | PRKCH    | 96  | 500 |
| PRKCI                         | PRKCI    | 34  | 500 |
| PRKCQ                         | PRKCQ    | 67  | 500 |
| PRKD1                         | PRKD1    | 95  | 500 |
| PRKD2                         | PRKD2    | 86  | 500 |
| PRKD3                         | PRKD3    | 78  | 500 |
| PRKG1                         | PRKG1    | 100 | 500 |
| PRKG2                         | PRKG2    | 82  | 500 |
| PRKR                          | EIF2AK2  | 99  | 500 |
| PRKX                          | PRKX     | 92  | 500 |
| PRP4                          | PRPF4B   | 100 | 500 |
| PYK2                          | PTK2B    | 100 | 500 |
| QSK                           | KIAA0999 | 97  | 500 |
| RAF1                          | RAF1     | 46  | 500 |
| RET                           | RET      | 3.2 | 500 |
| RET(M918T)                    | RET      | 5.7 | 500 |
| RET(V804L)                    | RET      | 70  | 500 |
| RET(V804M)                    | RET      | 86  | 500 |
| RIOK1                         | RIOK1    | 93  | 500 |
| RIOK2                         | RIOK2    | 100 | 500 |
| RIOK3                         | RIOK3    | 100 | 500 |
| RIPK1                         | RIPK1    | 82  | 500 |
| RIPK2                         | RIPK2    | 2   | 500 |
| RIPK4                         | RIPK4    | 87  | 500 |
| RIPK5                         | DSTYK    | 44  | 500 |
| ROCK1                         | ROCK1    | 85  | 500 |
| ROCK2                         | ROCK2    | 70  | 500 |
| ROS1                          | ROS1     | 84  | 500 |
| RPS6KA4(Kin.Dom.1-N-terminal) | RPS6KA4  | 91  | 500 |
| RPS6KA4(Kin.Dom.2-C-terminal) | RPS6KA4  | 87  | 500 |

|                               |         |     |     |
|-------------------------------|---------|-----|-----|
| RPS6KA5(Kin.Dom.1-N-terminal) | RPS6KA5 | 95  | 500 |
| RPS6KA5(Kin.Dom.2-C-terminal) | RPS6KA5 | 93  | 500 |
| RSK1(Kin.Dom.1-N-terminal)    | RPS6KA1 | 97  | 500 |
| RSK1(Kin.Dom.2-C-terminal)    | RPS6KA1 | 95  | 500 |
| RSK2(Kin.Dom.1-N-terminal)    | RPS6KA3 | 86  | 500 |
| RSK2(Kin.Dom.2-C-terminal)    | RPS6KA3 | 93  | 500 |
| RSK3(Kin.Dom.1-N-terminal)    | RPS6KA2 | 100 | 500 |
| RSK3(Kin.Dom.2-C-terminal)    | RPS6KA2 | 84  | 500 |
| RSK4(Kin.Dom.1-N-terminal)    | RPS6KA6 | 100 | 500 |
| RSK4(Kin.Dom.2-C-terminal)    | RPS6KA6 | 97  | 500 |
| S6K1                          | RPS6KB1 | 87  | 500 |
| SBK1                          | SBK1    | 100 | 500 |
| SGK                           | SGK1    | 91  | 500 |
| SgK110                        | SgK110  | 85  | 500 |
| SGK2                          | SGK2    | 83  | 500 |
| SGK3                          | SGK3    | 96  | 500 |
| SIK                           | SIK1    | 21  | 500 |
| SIK2                          | SIK2    | 74  | 500 |
| SLK                           | SLK     | 55  | 500 |
| SNARK                         | NUAK2   | 70  | 500 |
| SNRK                          | SNRK    | 79  | 500 |
| SRC                           | SRC     | 1.6 | 500 |
| SRMS                          | SRMS    | 1.1 | 500 |
| SRPK1                         | SRPK1   | 65  | 500 |
| SRPK2                         | SRPK2   | 100 | 500 |
| SRPK3                         | SRPK3   | 96  | 500 |
| STK16                         | STK16   | 86  | 500 |
| STK33                         | STK33   | 87  | 500 |
| STK35                         | STK35   | 95  | 500 |
| STK36                         | STK36   | 90  | 500 |
| STK39                         | STK39   | 97  | 500 |
| SYK                           | SYK     | 100 | 500 |
| TAK1                          | MAP3K7  | 73  | 500 |
| TAOK1                         | TAOK1   | 100 | 500 |
| TAOK2                         | TAOK2   | 80  | 500 |
| TAOK3                         | TAOK3   | 99  | 500 |
| TBK1                          | TBK1    | 61  | 500 |
| TEC                           | TEC     | 13  | 500 |
| TESK1                         | TESK1   | 74  | 500 |
| TGFBR1                        | TGFBR1  | 88  | 500 |

|                              |         |     |     |
|------------------------------|---------|-----|-----|
| TGFBR2                       | TGFBR2  | 100 | 500 |
| TIE1                         | TIE1    | 57  | 500 |
| TIE2                         | TEK     | 63  | 500 |
| TLK1                         | TLK1    | 99  | 500 |
| TLK2                         | TLK2    | 93  | 500 |
| TNIK                         | TNIK    | 93  | 500 |
| TNK1                         | TNK1    | 13  | 500 |
| TNK2                         | TNK2    | 43  | 500 |
| TNNI3K                       | TNNI3K  | 52  | 500 |
| TRKA                         | NTRK1   | 59  | 500 |
| TRKB                         | NTRK2   | 100 | 500 |
| TRKC                         | NTRK3   | 77  | 500 |
| TRPM6                        | TRPM6   | 73  | 500 |
| TSSK1B                       | TSSK1B  | 92  | 500 |
| TSSK3                        | TSSK3   | 99  | 500 |
| TTK                          | TTK     | 50  | 500 |
| TXK                          | TXK     | 42  | 500 |
| TYK2(JH1domain-catalytic)    | TYK2    | 98  | 500 |
| TYK2(JH2domain-pseudokinase) | TYK2    | 94  | 500 |
| TYRO3                        | TYRO3   | 42  | 500 |
| ULK1                         | ULK1    | 84  | 500 |
| ULK2                         | ULK2    | 93  | 500 |
| ULK3                         | ULK3    | 87  | 500 |
| VEGFR2                       | KDR     | 56  | 500 |
| VPS34                        | PIK3C3  | 100 | 500 |
| VRK2                         | VRK2    | 86  | 500 |
| WEE1                         | WEE1    | 97  | 500 |
| WEE2                         | WEE2    | 84  | 500 |
| WNK1                         | WNK1    | 95  | 500 |
| WNK2                         | WNK2    | 88  | 500 |
| WNK3                         | WNK3    | 88  | 500 |
| WNK4                         | WNK4    | 79  | 500 |
| YANK1                        | STK32A  | 13  | 500 |
| YANK2                        | STK32B  | 13  | 500 |
| YANK3                        | STK32C  | 68  | 500 |
| YES                          | YES1    | 11  | 500 |
| YSK1                         | STK25   | 100 | 500 |
| YSK4                         | MAP3K19 | 85  | 500 |
| ZAK                          | ZAK     | 81  | 500 |
| ZAP70                        | ZAP70   | 87  | 500 |
